# Supplementary material for: Effect and Process Evaluation of a Cluster Randomized Control Trial on Water Intake and Beverage Consumption in Preschoolers from Six European Countries: The ToyBox-Study
Source: PLoS One. 2016 Apr 11;11(4):e0152928. doi: 10.1371/journal.pone.0152928 (PMC4827861; doi:10.1371/journal.pone.0152928)
Supplement: S1 File — (XLSX) [file pone.0152928.s001.xlsx]

## Sheet: Data Implementation scores_A.Pi
Constante	child_id_number	countrycode	schoolcode	classcode	Preschooler	Time	group	Gender	Age_years	SES_Moth	Total_ImplScore	Water	Tea	Softdrinks	Lightsoftdrinks	Purefruitjuice	Otherfruitjuice	Smoothies	Milk	Othermilk	TotalFluid
1	110060241	1	0	0	1	1	2	1	4.37235	0	1	64.2857	0	107.143	0	21.4286	64.2857	0	196.429	10	420.651
1	110060241	1	0	0	1	2	2	1	4.37235	0	1	353.571	0	250	0	0	107.143	0	50	150	842.579
1	110240761	1	0	0	3	1	2	0	4.564	0	1	550	0	150	0	0	107.143	0	350	0	1093.11
1	110240761	1	0	0	3	2	2	0	4.564	0	1	0	0	0	0	0	0	0	0	0	0
1	120210121	1	0	0	6	1	2	1	3.87406	1	1	350	0	21.4286	21.4286	1.66667	3.33333	0	64.2857	3.33333	455.15
1	120210121	1	0	0	6	2	2	1	3.87406	1	1	550	0	21.4286	35.7143	0	35.7143	0	107.143	107.143	820.907
1	130220731	1	0	0	9	1	2	1	4.79124	1	1	550	0	10	0	0	16.6667	0	0	10	582.103
1	130220731	1	0	0	9	2	2	1	4.79124	1	1	0	0	0	0	0	0	0	0	0	0
1	130230171	1	0	0	10	1	2	1	3.78645	0	1	250	1.66667	1.66667	1.66667	1.66667	21.4286	1.66667	0	1.66667	278.188
1	130230171	1	0	0	10	2	2	1	3.78645	0	1	750	0	1.66667	107.143	1.66667	150	0	64.2857	16.6667	1063.81
1	130280101	1	0	0	11	1	2	0	3.73169	0	1	650	21.4286	21.4286	10	10	0	0	107.143	0	805.197
1	130280101	1	0	0	11	2	2	0	3.73169	0	1	750	16.6667	35.7143	0	10	10	0	117.857	0	921.861
1	120010101	1	1	1	161	1	2	0	3.98084	1	1	250	0	0	0	0	0	0	550	250	948.7
1	120010101	1	1	1	161	2	2	0	3.98084	1	1	250	0	0	0	0	0	0	550	150	865.9
1	120010121	1	1	1	162	1	2	0	3.57563	0	1	750	7.14286	7.14286	0	0	3.33333	0	0	3.33333	769.284
1	120010121	1	1	1	162	2	2	0	3.57563	0	1	650	21.4286	7.14286	3.33333	1.66667	7.14286	0	0	1.66667	690.339
1	120010131	1	1	1	163	1	2	0	3.85216	0	1	64.2857	0	21.4286	21.4286	0	3.33333	0	117.857	7.14286	219.01
1	120010131	1	1	1	163	2	2	0	3.85216	0	1	450	0	10	107.143	10	10	0	107.143	16.6667	692.387
1	120010141	1	1	1	164	1	2	1	3.52361	1	1	850	16.6667	235.714	0	10	16.6667	0	450	50	1545.93
1	120010141	1	1	1	164	2	2	1	3.52361	1	1	350	150	35.7143	1.66667	16.6667	16.6667	1.66667	350	16.6667	891.324
1	120010151	1	1	1	165	1	2	0	4.09035	1	1	950	8.33333	35.7143	0	0	35.7143	0	150	35.7143	1185.89
1	120010151	1	1	1	165	2	2	0	4.09035	1	1	950	21.4286	64.2857	0	0	16.6667	0	150	16.6667	1191.93
1	120010161	1	1	1	166	1	2	1	3.91513	0	1	150	1.66667	35.7143	1.66667	5	150	0	150	3.33333	460.202
1	120010161	1	1	1	166	2	2	1	3.91513	0	1	350	0	23.3333	5	150	150	0	250	5	869.667
1	120010261	1	1	2	125	1	2	0	4.19713	0	1	150	0	0	0	0	250	0	50	21.4286	434.943
1	120010261	1	1	2	125	2	2	0	4.19713	0	1	350	0	0	0	5	250	0	250	107.143	889.134
1	120010271	1	1	2	126	1	2	1	3.9206	1	1	450	21.4286	1.66667	1.66667	21.4286	107.143	0	117.857	107.143	782.934
1	120010271	1	1	2	126	2	2	1	3.9206	1	1	550	0	64.2857	0	0	150	0	107.143	107.143	925.793
1	120010311	1	1	2	127	1	2	0	3.88775	0	1	450	1.66667	1.66667	1.66667	117.857	1.66667	1.66667	117.857	1.66667	668.677
1	120010311	1	1	2	127	2	2	0	3.88775	0	1	450	1.66667	1.66667	1.66667	10	1.66667	3.33333	150	3.33333	604.897
1	120010371	1	1	2	128	1	2	0	3.75633	1	1	550	0	7.14286	0	10	21.4286	0	550	3.33333	1078.79
1	120010371	1	1	2	128	2	2	0	3.75633	1	1	350	0	64.2857	1.66667	0	0	0	250	0	632.943
1	120010391	1	1	2	129	1	2	0	3.62765	0	1	550	0	16.6667	0	64.2857	0	0	250	21.4286	863.055
1	120010391	1	1	2	129	2	2	0	3.62765	0	1	750	0	0	0	7.14286	0	0	117.857	7.14286	867.593
1	120010501	1	1	3	95	1	2	1	3.6386	0	1	450	0	5	0	10	21.4286	0	250	64.2857	759.135
1	120010501	1	1	3	95	2	2	1	3.6386	0	1	650	1.66667	5	1.66667	8.33333	10	1.66667	350	64.2857	1041.66
1	120010521	1	1	3	96	1	2	1	3.87132	0	1	107.143	0	0	0	0	250	0	550	64.2857	874.571
1	120010521	1	1	3	96	2	2	1	3.87132	0	1	550	0	35.7143	0	0	250	0	250	107.143	1116.82
1	120010531	1	1	3	97	1	2	0	4.1807	0	1	450	0	50	0	0	16.6667	0	350	8.33333	829.583
1	120010531	1	1	3	97	2	2	0	4.1807	0	1	196.429	0	107.143	0	0	5	0	150	5	435.44
1	120010601	1	1	3	98	1	2	0	3.52361	1	1	450	0	35.7143	0	35.7143	450	0	0	10	922.459
1	120010601	1	1	3	98	2	2	0	3.52361	1	1	950	64.2857	107.143	0	21.4286	0	0	0	10	1137.77
1	120010611	1	1	3	99	1	2	0	3.6742	0	1	250	0	0	0	0	0	0	250	21.4286	491.243
1	120010611	1	1	3	99	2	2	0	3.6742	0	1	250	1.66667	10	5	5	5	1.66667	250	21.4286	517.168
1	120010631	1	1	3	100	1	2	1	4.08487	0	1	550	0	35.7143	0	0	10	0	450	0	993.307
1	120010631	1	1	3	100	2	2	1	4.08487	0	1	750	0	21.4286	0	0	10	0	250	10	1009.94
1	120010641	1	1	3	101	1	2	0	3.56468	0	1	550	0	0	0	0	0	0	0	0	550
1	120010641	1	1	3	101	2	2	0	3.56468	0	1	550	0	1.66667	7.14286	0	3.33333	0	1.66667	0	563.026
1	120010661	1	1	3	102	1	2	1	3.55921	0	1	550	0	1.66667	1.66667	1.66667	1.66667	0	150	3.33333	692.965
1	120010661	1	1	3	102	2	2	1	3.55921	0	1	550	0	0	0	0	10	0	0	10	567.18
1	120010721	1	1	4	87	1	2	0	4.35866	1	1	150	0	350	1.66667	10	64.2857	10	64.2857	150	722.726
1	120010721	1	1	4	87	2	2	0	4.35866	1	1	350	0	350	0	10	35.7143	10	107.143	64.2857	862.99
1	120010731	1	1	4	88	1	2	0	5.15811	0	1	650	0	0	0	0	0	0	150	0	784.1
1	120010731	1	1	4	88	2	2	0	5.15811	0	1	650	0	0	0	0	0	0	150	0	784.1
1	120010761	1	1	4	89	1	2	1	4.4271	1	1	350	0	150	21.4286	16.6667	0	0	0	10	529.078
1	120010761	1	1	4	89	2	2	1	4.4271	1	1	250	0	150	35.7143	10	21.4286	0	0	0	448.119
1	120010801	1	1	4	90	1	2	1	4.34497	0	1	50	0	1.66667	1.66667	35.7143	35.7143	5	250	1.66667	345.735
1	120010801	1	1	4	90	2	2	1	4.34497	0	1	150	0	3.33333	0	5	5	0	150	0	295.967
1	120010821	1	1	4	91	1	2	0	5.06502	1	1	350	1.66667	350	1.66667	21.4286	117.857	1.66667	64.2857	21.4286	868.465
1	120010821	1	1	4	91	2	2	0	5.06502	1	1	350	0	350	1.66667	1.66667	64.2857	0	64.2857	3.33333	785.219
1	120010831	1	1	4	92	1	2	0	4.45996	1	1	650	0	0	150	0	21.4286	0	0	150	941.771
1	120010831	1	1	4	92	2	2	0	4.45996	1	1	550	0	0	150	0	21.4286	0	150	50	893.071
1	120010881	1	1	4	93	1	2	1	4.47912	0	1	450	0	107.143	0	21.4286	64.2857	0	0	3.33333	625.239
1	120010881	1	1	4	93	2	2	1	4.47912	0	1	150	0	107.143	0	3.33333	39.2857	1.66667	64.2857	64.2857	396.382
1	120010891	1	1	4	94	1	2	0	4.89802	0	1	850	1.66667	23.3333	1.66667	23.3333	23.3333	1.66667	250	1.66667	1142.02
1	120010891	1	1	4	94	2	2	0	4.89802	0	1	1100	1.66667	1.66667	1.66667	1.66667	1.66667	1.66667	250	1.66667	1334.1
1	120010921	1	1	5	79	1	2	1	5.08966	1	1	350	0	5	5	5	10	0	21.4286	5	396.062
1	120010921	1	1	5	79	2	2	1	5.08966	1	1	150	1.66667	5	1.66667	1.66667	117.857	1.66667	10	1.66667	275.946
1	120010931	1	1	5	80	1	2	0	4.63244	0	1	1100	0	0	0	0	0	0	0	0	1100
1	120010931	1	1	5	80	2	2	0	4.63244	0	1	550	0	16.6667	0	16.6667	35.7143	0	250	16.6667	848.802
1	120010961	1	1	5	81	1	2	1	4.98563	1	1	550	1.66667	7.14286	0	1.66667	117.857	1.66667	1.66667	1.66667	668.773
1	120010961	1	1	5	81	2	2	1	4.98563	1	1	450	16.6667	107.143	0	0	16.6667	0	10	0	586.745
1	120010971	1	1	5	82	1	2	0	4.50103	0	1	350	0	250	150	0	350	0	0	150	1158.95
1	120010971	1	1	5	82	2	2	0	4.50103	0	1	150	0	64.2857	117.857	0	250	0	0	250	753.971
1	120010981	1	1	5	83	1	2	1	4.90349	0	1	350	21.4286	50	1.66667	64.2857	64.2857	1.66667	1.66667	10	543.27
1	120010981	1	1	5	83	2	2	1	4.90349	0	1	450	16.6667	35.7143	1.66667	16.6667	35.7143	1.66667	23.3333	1.66667	570.616
1	120010991	1	1	5	84	1	2	0	4.35044	#NULL!	1	550	0	10	0	21.4286	21.4286	0	117.857	0	702.369
1	120010991	1	1	5	84	2	2	0	4.35044	#NULL!	1	550	1.66667	16.6667	1.66667	21.4286	1.66667	1.66667	21.4286	10	617.612
1	120011071	1	1	5	85	1	2	0	5.00205	0	1	250	0	64.2857	0	0	64.2857	0	250	64.2857	641.736
1	120011071	1	1	5	85	2	2	0	5.00205	0	1	150	16.6667	50	0	0	21.4286	0	550	107.143	811.086
1	120011101	1	1	5	86	1	2	1	4.7091	0	1	350	0	21.4286	0	0	7.14286	0	64.2857	10	441.373
1	120011101	1	1	5	86	2	2	1	4.7091	0	1	550	0	21.4286	0	10	21.4286	0	64.2857	0	654.647
1	120011251	1	1	6	78	1	2	0	3.50171	#NULL!	1	450	10	1.66667	1.66667	1.66667	10	1.66667	10	1.66667	485.282
1	120011251	1	1	6	78	2	2	0	3.50171	#NULL!	1	350	5	0	0	10	21.4286	0	250	21.4286	624.149
1	120011391	1	1	7	74	1	2	0	4.4627	0	1	450	0	50	0	3.33333	39.2857	0	250	250	963.361
1	120011391	1	1	7	74	2	2	0	4.4627	0	1	350	0	50	0	0	21.4286	0	10	150	547.161
1	120011451	1	1	7	75	1	2	1	4.39973	0	1	550	1.66667	35.7143	1.66667	16.6667	35.7143	10	250	150	988.341
1	120011451	1	1	7	75	2	2	1	4.39973	0	1	21.4286	21.4286	10	0	10	21.4286	10	350	150	525.537
1	120011481	1	1	7	76	1	2	1	4.8104	0	1	107.143	0	0	0	0	64.2857	0	350	0	477.257
1	120011481	1	1	7	76	2	2	1	4.8104	0	1	350	0	0	0	35.7143	350	0	250	0	916.571
1	120011491	1	1	7	77	1	2	0	4.32307	0	1	450	3.33333	10	0	5	35.7143	0	350	10	819.706
1	120011491	1	1	7	77	2	2	0	4.32307	0	1	750	10	35.7143	0	21.4286	16.6667	10	250	16.6667	1071.87
1	120011511	1	1	8	71	1	2	0	3.57563	#NULL!	1	350	250	21.4286	0	196.429	196.429	64.2857	150	16.6667	1171.31
1	120011511	1	1	8	71	2	2	0	3.57563	#NULL!	1	450	64.2857	35.7143	0	150	64.2857	10	21.4286	16.6667	777.8
1	120011581	1	1	8	72	1	2	1	4.12868	1	1	650	0	5	0	7.14286	150	0	10	7.14286	809.164
1	120011581	1	1	8	72	2	2	1	4.12868	1	1	750	0	3.33333	0	3.33333	3.33333	0	10	3.33333	770.61
1	120011621	1	1	8	73	1	2	0	3.85216	0	1	550	0	10	0	16.6667	275	1.66667	250	35.7143	1072.99
1	120011621	1	1	8	73	2	2	0	3.85216	0	1	550	0	35.7143	0	35.7143	196.429	0	250	35.7143	1041.57
1	120011721	1	1	9	66	1	2	0	5.16632	#NULL!	1	450	16.6667	35.7143	0	0	107.143	0	250	107.143	906.329
1	120011721	1	1	9	66	2	2	0	5.16632	#NULL!	1	450	64.2857	50	1.66667	23.3333	107.143	16.6667	450	196.429	1256.25
1	120011761	1	1	9	67	1	2	1	4.85695	1	1	550	0	5	64.2857	64.2857	64.2857	0	0	10	740.461
1	120011761	1	1	9	67	2	2	1	4.85695	1	1	350	0	0	353.571	0	117.857	0	39.2857	0	840.05
1	120011771	1	1	9	68	1	2	1	4.54757	0	1	550	0	7.14286	3.33333	21.4286	10	0	150	10	729.944
1	120011771	1	1	9	68	2	2	1	4.54757	0	1	650	0	16.6667	16.6667	10	10	0	64.2857	10	764.975
1	120011801	1	1	9	69	1	2	1	5.07598	1	1	64.2857	0	250	0	10	64.2857	0	0	64.2857	408.319
1	120011801	1	1	9	69	2	2	1	5.07598	1	1	250	10	107.143	16.6667	16.6667	107.143	0	39.2857	10	526.303
1	120011851	1	1	9	70	1	2	1	5.08966	#NULL!	1	196.429	1.66667	350	64.2857	1.66667	107.143	1.66667	107.143	21.4286	788.195
1	120011851	1	1	9	70	2	2	1	5.08966	#NULL!	1	150	0	450	1.66667	1.66667	107.143	1.66667	21.4286	21.4286	691.38
1	110020251	1	2	2	200	1	2	0	3.75633	0	1	450	0	21.4286	8.33333	0	64.2857	0	150	350	958.629
1	110020251	1	2	2	200	2	2	0	3.75633	0	1	350	0	7.14286	0	3.33333	3.33333	0	150	50	537.835
1	110020261	1	2	2	201	1	2	0	4.1588	0	1	250	0	64.2857	0	10	250	0	64.2857	250	803.604
1	110020261	1	2	2	201	2	2	0	4.1588	0	1	450	0	50	0	16.6667	196.429	0	350	107.143	1086.12
1	110020271	1	2	2	202	1	2	1	3.80835	1	1	0	107.143	0	275	0	0	1.66667	192.857	150	677.35
1	110020271	1	2	2	202	2	2	1	3.80835	1	1	278.571	21.4286	23.3333	23.3333	278.571	0	1.66667	1100	23.3333	1594.48
1	110020421	1	2	3	185	1	2	1	4.81588	1	1	64.2857	0	450	150	0	0	10	250	196.429	1012.18
1	110020421	1	2	3	185	2	2	1	4.81588	1	1	353.571	0	450	353.571	0	0	3.33333	5	117.857	1213.11
1	110020451	1	2	3	186	1	2	1	4.86516	1	1	432.143	0	364.286	0	21.4286	10	0	107.143	35.7143	912.836
1	110020451	1	2	3	186	2	2	1	4.86516	1	1	350	0	107.143	0	16.6667	16.6667	0	107.143	35.7143	601.245
1	110020461	1	2	3	187	1	2	0	5.22382	1	1	107.143	0	450	250	1.66667	250	0	0	16.6667	996.966
1	110020461	1	2	3	187	2	2	0	5.22382	1	1	350	0	450	250	1.66667	250	0	0	150	1350.22
1	110020521	1	2	3	188	1	2	0	4.98563	1	1	450	3.33333	16.6667	10	16.6667	16.6667	1.66667	117.857	21.4286	632.337
1	110020521	1	2	3	188	2	2	0	4.98563	1	1	450	0	64.2857	1.66667	10	21.4286	0	250	5	764.994
1	110020541	1	2	3	189	1	2	0	4.98289	0	1	64.2857	0	21.4286	3.33333	0	250	0	150	117.857	541.036
1	110020541	1	2	3	189	2	2	0	4.98289	0	1	64.2857	0	35.7143	0	0	350	0	250	250	838.393
1	110020561	1	2	3	190	1	2	0	4.39973	1	1	550	64.2857	1.66667	1.66667	1.66667	39.2857	1.66667	275	107.143	989.822
1	110020561	1	2	3	190	2	2	0	4.39973	1	1	0	196.429	64.2857	0	0	64.2857	0	350	107.143	712.854
1	110020601	1	2	3	191	1	2	0	4.98015	1	1	353.571	0	250	1.66667	1.66667	275	0	107.143	150	1046.18
1	110020601	1	2	3	191	2	2	0	4.98015	1	1	550	0	0	0	3.33333	10	0	250	250	992.347
1	110030011	1	3	1	342	1	1	1	3.78645	0	4	850	7.14286	1.66667	1.66667	21.4286	21.4286	1.66667	64.2857	21.4286	974.963
1	110030011	1	3	1	342	2	1	1	3.78645	0	4	950	21.4286	1.66667	1.66667	1.66667	7.14286	1.66667	64.2857	21.4286	1059.05
1	110030021	1	3	1	343	1	1	0	3.86311	1	4	450	0	21.4286	0	0	64.2857	0	850	150	1410.58
1	110030021	1	3	1	343	2	1	0	3.86311	1	4	450	0	21.4286	1.66667	0	107.143	0	250	0	789.771
1	110030051	1	3	1	344	1	1	0	3.86585	1	2	450	0	150	0	0	35.7143	0	0	35.7143	646.207
1	110030051	1	3	1	344	2	1	0	3.86585	1	2	350	0	350	0	0	5	0	0	117.857	766.686
1	110030061	1	3	1	345	1	1	0	3.6386	1	4	250	0	64.2857	1.66667	1.66667	107.143	0	64.2857	0	463.745
1	110030061	1	3	1	345	2	1	0	3.6386	1	4	350	0	10	7.14286	10	10	0	350	0	696.701
1	110030071	1	3	1	346	1	1	0	3.92608	#NULL!	2	750	0	0	250	0	250	0	450	0	1622.3
1	110030071	1	3	1	346	2	1	0	3.92608	#NULL!	2	650	21.4286	150	0	0	196.429	0	550	450	1845.38
1	110030081	1	3	1	347	1	1	0	3.62765	0	2	250	1.66667	107.143	35.7143	1.66667	10	1.66667	350	196.429	870.71
1	110030081	1	3	1	347	2	1	0	3.62765	0	2	250	0	64.2857	64.2857	0	7.14286	0	150	0	511.893
1	110030101	1	3	1	348	1	1	1	3.83299	#NULL!	4	550	0	0	0	5	10	0	350	117.857	973.806
1	110030101	1	3	1	348	2	1	1	3.83299	#NULL!	4	350	1.66667	1.66667	1.66667	5	21.4286	1.66667	117.857	150	609.319
1	110030141	1	3	1	349	1	1	0	3.54552	#NULL!	4	550	0	0	0	0	64.2857	0	64.2857	64.2857	717.914
1	110030141	1	3	1	349	2	1	0	3.54552	#NULL!	4	550	0	0	0	0	64.2857	0	64.2857	64.2857	717.914
1	110030261	1	3	2	298	1	1	0	4.41889	1	2	550	0	0	0	0	16.6667	0	16.6667	350	869.533
1	110030261	1	3	2	298	2	1	0	4.41889	1	2	150	0	0	0	0	5	0	150	150	412.75
1	110030271	1	3	2	299	1	1	0	4.64339	1	2	550	0	21.4286	0	64.2857	7.14286	0	450	10	1043.03
1	110030271	1	3	2	299	2	1	0	4.64339	1	2	650	0	21.4286	0	23.3333	10	10	250	35.7143	960.562
1	110030291	1	3	2	300	1	1	0	4.30116	0	2	550	0	64.2857	0	0	0	0	0	150	731.993
1	110030291	1	3	2	300	2	1	0	4.30116	0	2	650	0	150	0	107.143	0	0	0	107.143	968.279
1	110030341	1	3	2	301	1	1	0	4.82957	#NULL!	2	250	0	150	0	0	0	0	150	50	560.35
1	110030341	1	3	2	301	2	1	0	4.82957	#NULL!	2	1100	0	0	0	0	0	0	0	0	1100
1	110030381	1	3	2	302	1	1	0	4.70363	1	4	450	0	150	150	0	35.7143	0	450	21.4286	1185.18
1	110030381	1	3	2	302	2	1	0	4.70363	1	4	550	0	250	250	0	16.6667	0	250	150	1384.78
1	110030401	1	3	2	303	1	1	0	4.72827	1	4	0	0	450	0	0	0	0	0	450	777.15
1	110030401	1	3	2	303	2	1	0	4.72827	1	4	50	0	550	0	0	0	0	250	250	974.95
1	110030411	1	3	2	304	1	1	1	4.50376	0	4	250	0	10	0	3.33333	0	0	150	150	520.237
1	110030411	1	3	2	304	2	1	1	4.50376	0	4	750	0	10	0	0	10	0	250	250	1198.39
1	110030421	1	3	2	305	1	1	0	5.2293	0	2	450	0	150	150	0	64.2857	0	150	21.4286	942.407
1	110030421	1	3	2	305	2	1	0	5.2293	0	2	150	0	23.3333	23.3333	0	107.143	0	64.2857	21.4286	364.648
1	110030521	1	3	3	276	1	1	1	5.10062	1	4	250	0	107.143	0	64.2857	250	0	0	3.33333	628.41
1	110030521	1	3	3	276	2	1	1	5.10062	1	4	150	0	21.4286	64.2857	64.2857	64.2857	0	10	21.4286	373.633
1	110030531	1	3	3	277	1	1	0	5.1499	0	4	350	0	10	0	0	5	0	117.857	16.6667	482.604
1	110030531	1	3	3	277	2	1	0	5.1499	0	4	450	0	21.4286	0	3.33333	21.4286	0	250	10	723.062
1	110030551	1	3	3	278	1	1	1	5.11978	0	2	0	0	0	0	21.4286	0	0	64.2857	0	76.4143
1	110030551	1	3	3	278	2	1	1	5.11978	0	2	650	0	21.4286	1.66667	10	5	0	150	0	818.304
1	110030571	1	3	3	279	1	1	1	5.05133	1	2	196.429	1.66667	10	107.143	5	107.143	1.66667	16.6667	250	636.282
1	110030571	1	3	3	279	2	1	1	5.05133	1	2	589.286	1.66667	16.6667	321.429	1.66667	21.4286	1.66667	10	196.429	1117.73
1	110030591	1	3	3	280	1	1	0	4.73374	1	2	350	0	107.143	350	5	0	0	150	150	1055.54
1	110030591	1	3	3	280	2	1	0	4.73374	1	2	150	0	350	350	8.33333	64.2857	0	150	21.4286	1027.57
1	110030601	1	3	3	281	1	1	0	4.63792	#NULL!	2	550	1.66667	1.66667	1.66667	3.33333	21.4286	3.33333	250	21.4286	820.974
1	110030601	1	3	3	281	2	1	0	4.63792	#NULL!	2	350	0	0	0	0	0	0	150	64.2857	537.329
1	110030651	1	3	3	282	1	1	0	4.22998	0	2	450	0	0	0	10	107.143	0	450	117.857	1054.08
1	110030651	1	3	3	282	2	1	0	4.22998	0	2	450	0	3.33333	0	107.143	64.2857	0	550	64.2857	1149.85
1	110030681	1	3	3	283	1	1	1	4.282	0	4	950	0	0	0	0	0	0	350	35.7143	1292.47
1	110030681	1	3	3	283	2	1	1	4.282	0	4	650	0	5	0	0	0	0	0	107.143	743.209
1	120040041	1	4	1	454	1	1	0	3.81656	0	4	150	35.7143	107.143	1.66667	10	35.7143	1.66667	150	250	666.826
1	120040041	1	4	1	454	2	1	0	3.81656	0	4	350	35.7143	16.6667	1.66667	10	16.6667	1.66667	107.143	250	730.221
1	120040051	1	4	1	455	1	1	0	4.08761	0	2	550	21.4286	0	0	10	117.857	0	250	0	908.64
1	120040051	1	4	1	455	2	1	0	4.08761	0	2	550	21.4286	0	10	0	35.7143	0	350	0	925.993
1	120040111	1	4	1	456	1	1	0	4.04107	1	2	350	0	0	0	0	150	0	450	10	894.08
1	120040111	1	4	1	456	2	1	0	4.04107	1	2	250	0	107.143	0	0	107.143	0	250	21.4286	682.921
1	120040121	1	4	1	457	1	1	1	4.17248	0	2	150	21.4286	150	0	3.33333	150	0	150	150	701.004
1	120040121	1	4	1	457	2	1	1	4.17248	0	2	450	10	21.4286	1.66667	1.66667	432.143	1.66667	350	35.7143	1210.91
1	120040141	1	4	1	458	1	1	0	3.90144	1	4	750	0	0	0	64.2857	550	0	196.429	250	1678.94
1	120040141	1	4	1	458	2	1	0	3.90144	1	4	1100	0	35.7143	0	107.143	250	0	64.2857	64.2857	1560.02
1	120040191	1	4	1	459	1	1	1	3.77276	0	2	750	1.66667	3.33333	1.66667	16.6667	107.143	1.66667	550	353.571	1652.31
1	120040191	1	4	1	459	2	1	1	3.77276	0	2	750	1.66667	5	5	5	107.143	5	450	35.7143	1297.11
1	120040241	1	4	2	414	1	1	0	4.04654	1	4	250	64.2857	35.7143	16.6667	8.33333	50	0	650	50	1037.2
1	120040241	1	4	2	414	2	1	0	4.04654	1	4	196.429	35.7143	16.6667	10	1.66667	107.143	1.66667	196.429	10	539.158
1	120040351	1	4	2	415	1	1	1	4.06023	1	4	0	1.66667	0	0	1.66667	8.33333	0	250	10	242.335
1	120040351	1	4	2	415	2	1	1	4.06023	1	4	950	0	0	0	3.33333	3.33333	0	350	35.7143	1298.38
1	120040441	1	4	2	416	1	1	0	4.03559	1	2	650	1.66667	21.4286	10	1.66667	21.4286	1.66667	21.4286	21.4286	739.724
1	120040441	1	4	2	416	2	1	0	4.03559	1	2	550	0	250	0	0	21.4286	0	64.2857	16.6667	865.093
1	120040491	1	4	3	392	1	1	1	4.82409	0	4	450	196.429	1.66667	1.66667	117.857	64.2857	64.2857	64.2857	21.4286	941.923
1	120040491	1	4	3	392	2	1	1	4.82409	0	4	550	150	1.66667	1.66667	117.857	10	117.857	1.66667	21.4286	937.853
1	120040501	1	4	3	393	1	1	0	4.27379	0	2	350	0	0	0	21.4286	150	0	64.2857	150	684.114
1	120040501	1	4	3	393	2	1	0	4.27379	0	2	450	0	107.143	0	21.4286	107.143	0	150	64.2857	847.95
1	120040531	1	4	3	394	1	1	0	4.36961	1	2	550	64.2857	0	0	21.4286	39.2857	0	150	64.2857	855.457
1	120040531	1	4	3	394	2	1	0	4.36961	1	2	650	64.2857	0	0	0	150	0	450	64.2857	1303.25
1	120040541	1	4	3	395	1	1	1	4.79124	1	2	450	0	0	0	0	0	0	250	107.143	762.214
1	120040541	1	4	3	395	2	1	1	4.79124	1	2	450	0	0	0	0	0	0	350	0	762.9
1	120040561	1	4	3	396	1	1	0	4.98836	0	4	450	1.66667	50	50	5	450	1.66667	107.143	35.7143	1077.84
1	120040561	1	4	3	396	2	1	0	4.98836	0	4	1100	0	107.143	107.143	0	350	0	107.143	35.7143	1739.25
1	120040571	1	4	3	397	1	1	0	5.05955	0	4	450	0	7.14286	0	3.33333	150	1.66667	7.14286	1.66667	602.084
1	120040571	1	4	3	397	2	1	0	5.05955	0	4	550	21.4286	107.143	0	10	250	0	21.4286	0	918.226
1	120040591	1	4	3	398	1	1	0	5.07871	0	2	250	1.66667	3.33333	1.66667	7.14286	250	1.66667	196.429	196.429	824.826
1	120040591	1	4	3	398	2	1	0	5.07871	0	2	0	1.66667	3.33333	1.66667	3.33333	196.429	1.66667	117.857	117.857	388.48
1	120040621	1	4	3	399	1	1	0	4.67077	0	2	350	0	21.4286	0	0	107.143	0	350	0	777.521
1	120040621	1	4	3	399	2	1	0	4.67077	0	2	250	0	10	0	0	10	0	250	0	491.39
1	120040641	1	4	3	400	1	1	0	4.64613	0	2	650	21.4286	10	0	3.33333	0	0	150	0	817.444
1	120040641	1	4	3	400	2	1	0	4.64613	0	2	450	107.143	21.4286	1.66667	35.7143	107.143	5	250	21.4286	950.471
1	120040651	1	4	3	401	1	1	0	5.31143	0	2	150	1.66667	5	1.66667	1.66667	650	1.66667	1.66667	1.66667	742.103
1	120040651	1	4	3	401	2	1	0	5.31143	0	2	50	3.33333	0	3.33333	0	3.33333	3.33333	0	0	62.4967
1	120040671	1	4	3	402	1	1	0	5.30869	0	2	450	0	250	0	0	21.4286	0	0	250	900.821
1	120040671	1	4	3	402	2	1	0	5.30869	0	2	450	0	0	0	0	0	0	0	150	574.2
1	120040681	1	4	3	403	1	1	0	4.55305	0	2	350	0	0	0	0	350	0	350	0	974.4
1	120040681	1	4	3	403	2	1	0	4.55305	0	2	0	0	0	0	0	196.429	0	0	0	174.821
1	120040691	1	4	3	404	1	1	1	5.20739	0	2	250	0	21.4286	0	0	117.857	0	0	64.2857	427.386
1	120040691	1	4	3	404	2	1	1	5.20739	0	2	350	10	0	21.4286	0	64.2857	0	0	64.2857	491.647
1	120040751	1	4	4	381	1	1	0	4.55852	0	2	450	0	0	0	21.4286	21.4286	0	7.14286	21.4286	512.143
1	120040751	1	4	4	381	2	1	0	4.55852	0	2	550	0	150	0	5	117.857	0	16.6667	10	817.343
1	120040831	1	4	4	382	1	1	0	4.34771	1	2	150	0	0	0	7.14286	39.2857	0	107.143	7.14286	292.979
1	120040831	1	4	4	382	2	1	0	4.34771	1	2	0	0	0	0	0	0	0	0	0	0
1	120040841	1	4	4	383	1	1	1	4.87064	#NULL!	2	650	107.143	78.5714	0	250	250	10	1.66667	1.66667	1282.74
1	120040841	1	4	4	383	2	1	1	4.87064	#NULL!	2	150	0	3.33333	0	10	50	0	64.2857	0	263.808
1	120040851	1	4	4	384	1	1	0	5.01848	1	2	1100	1.66667	0	0	0	64.2857	0	0	21.4286	1176.62
1	120040851	1	4	4	384	2	1	0	5.01848	1	2	1100	3.33333	21.4286	10	21.4286	0	0	250	64.2857	1428.17
1	120040871	1	4	4	385	1	1	1	4.38877	1	2	350	0	0	0	0	64.2857	0	0	0	407.214
1	120040871	1	4	4	385	2	1	1	4.38877	1	2	550	1.66667	16.6667	1.66667	1.66667	196.429	1.66667	1.66667	1.66667	748.913
1	120040881	1	4	4	386	1	1	1	4.34497	1	2	250	21.4286	50	0	21.4286	39.2857	0	21.4286	21.4286	407.164
1	120040881	1	4	4	386	2	1	1	4.34497	1	2	350	64.2857	150	0	21.4286	192.857	0	7.14286	0	746.043
1	120040931	1	4	4	387	1	1	1	4.75565	0	4	550	1.66667	3.33333	1.66667	1.66667	1.66667	1.66667	3.33333	3.33333	566.458
1	120040931	1	4	4	387	2	1	1	4.75565	0	4	1100	1.66667	3.33333	1.66667	1.66667	1.66667	1.66667	250	250	1541.22
1	120041001	1	4	5	379	1	1	0	4.54757	1	2	250	1.66667	50	50	50	11.6667	1.66667	250	35.7143	655.22
1	120041001	1	4	5	379	2	1	0	4.54757	1	2	450	0	64.2857	21.4286	0	0	0	150	10	671.387
1	130050011	1	5	1	587	1	1	0	3.69336	0	4	250	0	0	0	5	107.143	0	650	21.4286	948.62
1	130050011	1	5	1	587	2	1	0	3.69336	0	4	450	0	0	0	0	150	0	750	64.2857	1307.23
1	130050031	1	5	1	588	1	1	1	4.04654	0	4	750	0	0	0	0	117.857	0	450	0	1257.19
1	130050031	1	5	1	588	2	1	1	4.04654	0	4	0	0	0	0	0	0	0	21.4286	0	19.1571
1	130050051	1	5	1	589	1	1	0	4.21081	1	2	450	0	10	0	3.33333	39.2857	0	7.14286	21.4286	521.03
1	130050051	1	5	1	589	2	1	0	4.21081	1	2	550	0	21.4286	0	0	7.14286	0	196.429	0	751.229
1	130050071	1	5	1	590	1	1	1	4.2026	#NULL!	4	21.4286	0	0	0	16.6667	650	0	350	16.6667	941.362
1	130050071	1	5	1	590	2	1	1	4.2026	#NULL!	4	150	0	10	0	10	250	0	8.33333	0	397.78
1	130050131	1	5	1	591	1	1	0	3.99452	0	4	150	0	0	0	3.33333	107.143	0	35.7143	196.429	442.875
1	130050131	1	5	1	591	2	1	0	3.99452	0	4	250	0	10	0	107.143	150	0	64.2857	150	668.876
1	130050141	1	5	1	592	1	1	0	3.86311	0	4	250	0	250	0	0	0	0	250	0	698.25
1	130050141	1	5	1	592	2	1	0	3.86311	0	4	350	0	35.7143	0	0	35.7143	0	250	0	637.393
1	130050191	1	5	2	549	1	1	1	4.16701	0	4	250	1.66667	1.66667	1.66667	1.66667	117.857	1.66667	650	21.4286	961.472
1	130050191	1	5	2	549	2	1	1	4.16701	0	4	432.143	1.66667	23.3333	0	1.66667	107.143	1.66667	450	10	963.645
1	130050211	1	5	2	550	1	1	1	3.55373	1	4	250	0	1.66667	0	64.2857	64.2857	0	250	107.143	677.755
1	130050211	1	5	2	550	2	1	1	3.55373	1	4	0	0	0	0	21.4286	64.2857	10	250	150	432.557
1	130050221	1	5	2	551	1	1	1	3.90691	#NULL!	4	750	0	3.33333	0	0	107.143	0	192.857	107.143	1109.48
1	130050221	1	5	2	551	2	1	1	3.90691	#NULL!	4	550	0	7.14286	0	3.33333	3.33333	0	64.2857	21.4286	637.549
1	130050231	1	5	2	552	1	1	1	4.24093	0	4	150	0	35.7143	0	7.14286	64.2857	0	150	10	388.016
1	130050231	1	5	2	552	2	1	1	4.24093	0	4	550	1.66667	21.4286	0	1.66667	64.2857	1.66667	150	1.66667	766.547
1	130050241	1	5	2	553	1	1	1	4.30938	0	4	0	1.66667	7.14286	1.66667	3.33333	7.14286	1.66667	0	1.66667	21.8702
1	130050241	1	5	2	553	2	1	1	4.30938	0	4	450	0	10	1.66667	3.33333	3.33333	0	50	3.33333	514.013
1	130050281	1	5	3	508	1	1	1	4.3258	#NULL!	4	250	0	0	0	0	107.143	0	350	107.143	746.971
1	130050281	1	5	3	508	2	1	1	4.3258	#NULL!	4	350	0	5	5	16.6667	107.143	16.6667	250	107.143	796.25
1	130050291	1	5	3	509	1	1	0	4.2026	#NULL!	4	350	1.66667	50	50	1.66667	1.66667	1.66667	650	1.66667	1033
1	130050291	1	5	3	509	2	1	0	4.2026	#NULL!	4	350	0	21.4286	21.4286	21.4286	0	0	450	0	811.721
1	130050301	1	5	3	510	1	1	1	3.69336	0	2	550	0	64.2857	5	7.14286	0	0	0	0	619.057
1	130050301	1	5	3	510	2	1	1	3.69336	0	2	850	0	64.2857	3.33333	10	0	0	0	0	919.933
1	130050311	1	5	3	511	1	1	1	4.10404	0	4	150	1.66667	5	1.66667	1.66667	117.857	1.66667	250	21.4286	506.869
1	130050311	1	5	3	511	2	1	1	4.10404	0	4	550	0	10	0	5	10	0	450	21.4286	992.353
1	130050331	1	5	3	512	1	1	0	3.65777	1	2	450	1.66667	1.66667	1.66667	1.66667	21.4286	1.66667	7.14286	7.14286	489.108
1	130050331	1	5	3	512	2	1	0	3.65777	1	2	550	0	7.14286	0	0	21.4286	0	0	0	575.493
1	130050381	1	5	3	513	1	1	0	4.18891	0	2	275	0	0	64.2857	21.4286	0	0	350	150	794.686
1	130050381	1	5	3	513	2	1	0	4.18891	0	2	250	0	50	39.2857	10	117.857	0	150	350	871.476
1	130050401	1	5	3	514	1	1	1	4.30116	1	2	450	1.66667	1.66667	1.66667	1.66667	117.857	1.66667	250	10	794.41
1	130050401	1	5	3	514	2	1	1	4.30116	1	2	550	0	0	0	0	64.2857	0	350	21.4286	937.857
1	130050411	1	5	3	515	1	1	0	3.85763	0	4	350	0	0	0	0	64.2857	0	250	10	638.994
1	130050411	1	5	3	515	2	1	0	3.85763	0	4	450	1.66667	1.66667	1.66667	1.66667	10	1.66667	450	1.66667	870.317
1	130050431	1	5	4	503	1	1	0	4.59411	1	2	350	0	21.4286	64.2857	36.6667	250	0	192.857	471.429	1250.58
1	130050431	1	5	4	503	2	1	0	4.59411	1	2	0	0	0	0	0	0	0	0	0	0
1	130050461	1	5	4	504	1	1	1	4.8679	0	4	750	0	5	1.66667	35.7143	0	0	250	0	1011.22
1	130050461	1	5	4	504	2	1	1	4.8679	0	4	1100	0	10	1.66667	10	1.66667	0	250	5	1348.6
1	130050471	1	5	4	505	1	1	0	5.04038	0	2	21.4286	0	150	0	21.4286	117.857	0	64.2857	117.857	435.171
1	130050471	1	5	4	505	2	1	0	5.04038	0	2	0	0	0	0	0	0	0	0	0	0
1	130050491	1	5	4	506	1	1	0	4.48734	0	4	350	0	107.143	0	0	0	0	150	10	588.701
1	130050491	1	5	4	506	2	1	0	4.48734	0	4	450	0	150	0	0	35.7143	0	0	16.6667	630.436
1	130050521	1	5	4	507	1	1	0	4.68172	1	2	450	0	21.4286	0	0	21.4286	0	250	21.4286	729.579
1	130050521	1	5	4	507	2	1	0	4.68172	1	2	150	0	64.2857	0	3.33333	0	0	150	150	469.04
1	130050561	1	5	5	497	1	1	1	5.23477	0	4	750	0	0	0	0	0	0	450	0	1152.3
1	130050561	1	5	5	497	2	1	1	5.23477	0	4	1100	0	0	0	0	0	0	21.4286	0	1119.16
1	130050601	1	5	5	498	1	1	1	4.82957	0	4	450	0	21.4286	0	10	64.2857	0	350	21.4286	865.961
1	130050601	1	5	5	498	2	1	1	4.82957	0	4	450	0	21.4286	10	10	64.2857	0	250	10	776.999
1	130050611	1	5	5	499	1	1	1	4.88433	0	4	950	5	5	0	5	35.7143	0	150	5	1133.94
1	130050611	1	5	5	499	2	1	1	4.88433	0	4	850	1.66667	10	1.66667	3.33333	10	1.66667	150	35.7143	1039.27
1	130050641	1	5	5	500	1	1	0	5.16632	0	4	450	1.66667	1.66667	1.66667	1.66667	107.143	1.66667	1.66667	150	678.784
1	130050641	1	5	5	500	2	1	0	5.16632	0	4	0	0	0	0	16.6667	16.6667	0	0	0	29.5667
1	130050651	1	5	5	501	1	1	0	4.56126	0	4	550	1.66667	16.6667	1.66667	1.66667	196.429	1.66667	150	1.66667	881.523
1	130050651	1	5	5	501	2	1	0	4.56126	0	4	650	1.66667	10	1.66667	1.66667	117.857	1.66667	117.857	10	883.765
1	130050661	1	5	5	502	1	1	1	4.56126	#NULL!	4	550	1.66667	16.6667	1.66667	1.66667	196.429	1.66667	150	1.66667	881.523
1	130050661	1	5	5	502	2	1	1	4.56126	#NULL!	4	650	1.66667	10	1.66667	1.66667	117.857	1.66667	117.857	10	883.765
1	130050691	1	5	6	491	1	1	1	4.39151	0	4	450	1.66667	3.33333	1.66667	1.66667	50	1.66667	150	7.14286	643.749
1	130050691	1	5	6	491	2	1	1	4.39151	0	4	450	1.66667	35.7143	8.33333	5	64.2857	1.66667	150	21.4286	706.949
1	130050701	1	5	6	492	1	1	1	4.61602	0	4	350	0	107.143	107.143	150	150	0	150	10	960.873
1	130050701	1	5	6	492	2	1	1	4.61602	0	4	550	0	64.2857	21.4286	10	10	0	250	107.143	958.961
1	130050711	1	5	6	493	1	1	0	4.96646	0	4	350	0	1.66667	0	1.66667	3.33333	0	450	16.6667	772.038
1	130050711	1	5	6	493	2	1	0	4.96646	0	4	550	1.66667	35.7143	1.66667	5	21.4286	1.66667	450	23.3333	1031.98
1	130050721	1	5	6	494	1	1	1	5.28953	0	2	353.571	1.66667	16.6667	21.4286	5	107.143	10	21.4286	117.857	616.654
1	130050721	1	5	6	494	2	1	1	5.28953	0	2	196.429	0	64.2857	3.33333	10	21.4286	0	50	39.2857	362.661
1	130050761	1	5	6	495	1	1	1	4.92813	0	4	150	1.66667	1.66667	1.66667	10	21.4286	5	450	21.4286	607.118
1	130050761	1	5	6	495	2	1	1	4.92813	0	4	250	0	10	10	16.6667	117.857	16.6667	7.14286	107.143	498.116
1	130050771	1	5	6	496	1	1	1	4.74743	0	2	250	1.66667	16.6667	16.6667	5	16.6667	1.66667	150	0	437.952
1	130050771	1	5	6	496	2	1	1	4.74743	0	2	650	0	35.7143	35.7143	1.66667	35.7143	0	150	35.7143	914.395
1	110060011	1	6	1	710	1	2	0	4.10404	0	1	64.2857	0	0	0	0	350	0	0	0	375.786
1	110060011	1	6	1	710	2	2	0	4.10404	0	1	350	0	0	0	0	117.857	0	450	107.143	945.907
1	110060021	1	6	1	711	1	2	1	4.01643	#NULL!	1	350	1.66667	1.66667	1.66667	16.6667	107.143	3.33333	550	16.6667	973.304
1	110060021	1	6	1	711	2	2	1	4.01643	#NULL!	1	117.857	0	0	0	107.143	21.4286	0	450	10	642.223
1	110060041	1	6	1	712	1	2	0	3.83573	#NULL!	1	250	1.66667	3.33333	1.66667	1.66667	3.33333	3.33333	250	10	495.432
1	110060041	1	6	1	712	2	2	0	3.83573	#NULL!	1	350	0	21.4286	0	0	10	0	350	0	691.064
1	110060061	1	6	1	713	1	2	1	3.77823	0	1	750	21.4286	0	0	5	10	0	150	10	927.107
1	110060061	1	6	1	713	2	2	1	3.77823	0	1	650	5	0	0	3.33333	0	0	250	10	889.722
1	110060071	1	6	1	714	1	2	0	3.67967	1	1	196.429	1.66667	1100	1.66667	1.66667	16.6667	1.66667	650	650	2325.7
1	110060071	1	6	1	714	2	2	0	3.67967	1	1	64.2857	0	1100	0	0	196.429	0	150	250	1569.11
1	110060091	1	6	1	715	1	2	1	4.28747	0	1	450	0	10	0	0	35.7143	0	450	21.4286	910.819
1	110060091	1	6	1	715	2	2	1	4.28747	0	1	650	0	0	0	0	64.2857	0	0	650	1245.41
1	110060101	1	6	1	716	1	2	1	3.92882	0	1	550	0	10	0	117.857	0	0	450	8.33333	1072.38
1	110060101	1	6	1	716	2	2	1	3.92882	0	1	550	0	21.4286	0	64.2857	10	0	450	0	1037.29
1	110060111	1	6	1	717	1	2	1	3.82478	1	1	250	10	0	0	0	10	0	107.143	64.2857	417.904
1	110060111	1	6	1	717	2	2	1	3.82478	1	1	250	1.66667	0	0	1.66667	10	0	117.857	64.2857	420.631
1	110060121	1	6	1	718	1	2	1	3.81656	1	1	1100	0	16.6667	0	1.66667	0	0	150	1.66667	1251.94
1	110060121	1	6	1	718	2	2	1	3.81656	1	1	1100	0	23.3333	0	23.3333	23.3333	0	550	23.3333	1673.39
1	110060151	1	6	1	719	1	2	0	4.27105	#NULL!	1	0	1.66667	35.7143	1.66667	10	64.2857	0	350	10	422.656
1	110060151	1	6	1	719	2	2	0	4.27105	#NULL!	1	350	1.66667	107.143	35.7143	1.66667	107.143	1.66667	250	10	813.404
1	110060161	1	6	1	720	1	2	1	4.03012	0	1	250	0	1.66667	8.33333	1.66667	21.4286	0	450	64.2857	735.822
1	110060161	1	6	1	720	2	2	1	4.03012	0	1	0	0	0	8.33333	5	10	0	350	10	342.75
1	110060171	1	6	1	721	1	2	0	3.74812	0	1	1100	0	0	0	50	0	0	250	10	1375.98
1	110060171	1	6	1	721	2	2	0	3.74812	0	1	550	0	10	0	50	0	0	150	10	745.57
1	110060181	1	6	1	722	1	2	1	4.08761	1	1	350	0	250	1.66667	107.143	107.143	1.66667	196.429	1.66667	944.909
1	110060181	1	6	1	722	2	2	1	4.08761	1	1	450	0	150	64.2857	64.2857	64.2857	0	150	10	904.916
1	110060191	1	6	1	723	1	2	1	3.72621	0	1	350	0	21.4286	0	21.4286	21.4286	0	50	0	451.979
1	110060191	1	6	1	723	2	2	1	3.72621	0	1	450	1.66667	1.66667	1.66667	10	64.2857	1.66667	250	1.66667	747.198
1	110060201	1	6	1	724	1	2	1	3.5373	#NULL!	1	650	0	107.143	0	35.7143	35.7143	0	0	107.143	898.393
1	110060201	1	6	1	724	2	2	1	3.5373	#NULL!	1	0	0	0	0	0	0	0	0	0	0
1	110060271	1	6	2	656	1	2	0	4.94456	0	1	150	0	3.33333	0	0	350	10	450	150	999.697
1	110060271	1	6	2	656	2	2	0	4.94456	0	1	150	0	150	0	0	107.143	0	450	21.4286	800.25
1	110060281	1	6	2	657	1	2	0	5.10062	0	1	250	0	0	0	3.33333	0	0	150	21.4286	404.79
1	110060281	1	6	2	657	2	2	0	5.10062	0	1	350	0	10	0	0	10	0	350	0	680.79
1	110060291	1	6	2	658	1	2	1	4.55578	0	1	39.2857	1.66667	1.66667	1.66667	0	0	1.66667	1.66667	1.66667	48.419
1	110060291	1	6	2	658	2	2	1	4.55578	0	1	107.143	1.66667	16.6667	1.66667	5	150	1.66667	1.66667	5	270.441
1	110060301	1	6	2	659	1	2	1	4.62971	0	1	550	0	0	0	1.66667	5	0	350	21.4286	886.566
1	110060301	1	6	2	659	2	2	1	4.62971	0	1	650	0	10	0	10	5	0	450	5	1078.72
1	110060311	1	6	2	660	1	2	1	4.50376	0	1	250	0	0	0	3.33333	64.2857	0	350	7.14286	628.975
1	110060311	1	6	2	660	2	2	1	4.50376	0	1	450	150	1.66667	1.66667	3.33333	21.4286	1.66667	3.33333	1.66667	630.826
1	110060331	1	6	2	661	1	2	0	5.18001	0	1	950	0	10	0	150	0	0	450	0	1493.89
1	110060331	1	6	2	661	2	2	0	5.18001	0	1	750	0	21.4286	0	64.2857	10	0	450	0	1237.29
1	110060391	1	6	2	662	1	2	1	4.67077	1	1	550	0	35.7143	0	64.2857	250	0	450	16.6667	1277.54
1	110060391	1	6	2	662	2	2	1	4.67077	1	1	950	0	0	0	64.2857	0	0	550	0	1498.53
1	110060421	1	6	2	663	1	2	1	4.87885	1	1	550	0	250	0	0	0	0	250	250	1205.25
1	110060421	1	6	2	663	2	2	1	4.87885	1	1	350	0	21.4286	0	3.33333	550	0	150	7.14286	1001.73
1	110060431	1	6	2	664	1	2	0	4.67625	1	1	196.429	0	64.2857	0	0	64.2857	0	250	250	741.936
1	110060431	1	6	2	664	2	2	0	4.67625	1	1	350	0	35.7143	0	0	64.2857	0	350	0	752.221
1	110070041	1	7	1	833	1	2	0	3.93155	1	1	350	1.66667	0	275	21.4286	21.4286	1.66667	64.2857	21.4286	738.594
1	110070041	1	7	1	833	2	2	0	3.93155	1	1	150	1.66667	150	21.4286	10	10	0	150	64.2857	512.798
1	110070051	1	7	1	834	1	2	1	3.81109	0	1	250	0	0	0	0	0	0	350	0	562.9
1	110070051	1	7	1	834	2	2	1	3.81109	0	1	150	0	3.33333	7.14286	3.33333	39.2857	3.33333	150	0	334.979
1	110070071	1	7	1	835	1	2	0	3.57563	0	1	650	0	21.4286	10	5	117.857	0	0	0	788.477
1	110070071	1	7	1	835	2	2	0	3.57563	0	1	150	3.33333	64.2857	0	3.33333	0	0	3.33333	0	217.05
1	110070131	1	7	1	836	1	2	1	3.51814	1	1	450	0	16.6667	0	0	150	0	64.2857	64.2857	709.183
1	110070131	1	7	1	836	2	2	1	3.51814	1	1	450	0	21.4286	10	0	64.2857	0	107.143	107.143	720.879
1	110070141	1	7	1	837	1	2	1	3.58111	0	1	450	0	21.4286	0	7.14286	117.857	21.4286	150	64.2857	786.443
1	110070141	1	7	1	837	2	2	1	3.58111	0	1	250	3.33333	7.14286	0	3.33333	196.429	10	250	35.7143	699.291
1	110070181	1	7	1	838	1	2	1	3.68515	0	1	450	1.66667	1.66667	1.66667	1.66667	21.4286	1.66667	250	64.2857	753.537
1	110070181	1	7	1	838	2	2	1	3.68515	0	1	250	0	10	0	3.33333	21.4286	0	250	64.2857	557.737
1	110070211	1	7	1	839	1	2	1	3.75359	0	1	450	21.4286	7.14286	0	0	21.4286	0	21.4286	64.2857	569.286
1	110070211	1	7	1	839	2	2	1	3.75359	0	1	450	21.4286	21.4286	21.4286	1.66667	10	1.66667	64.2857	10	589.46
1	110070241	1	7	1	840	1	2	0	3.76181	1	1	250	0	0	0	0	21.4286	0	21.4286	350	578.029
1	110070241	1	7	1	840	2	2	0	3.76181	1	1	350	0	150	0	0	10	0	196.429	117.857	766.943
1	110070311	1	7	2	789	1	2	1	4.08487	0	1	450	0	1.66667	3.33333	7.14286	1.66667	0	250	64.2857	739.325
1	110070311	1	7	2	789	2	2	1	4.08487	0	1	750	0	0	0	16.6667	107.143	0	550	107.143	1440.5
1	110070371	1	7	2	790	1	2	1	4.29569	0	1	250	0	21.4286	0	10	21.4286	0	64.2857	275	582.347
1	110070371	1	7	2	790	2	2	1	4.29569	0	1	250	0	21.4286	0	5	35.7143	0	64.2857	250	569.941
1	110070391	1	7	2	791	1	2	1	4.95003	0	1	450	0	0	0	0	3.33333	0	350	117.857	863.452
1	110070391	1	7	2	791	2	2	1	4.95003	0	1	650	0	16.6667	0	16.6667	16.6667	0	250	250	1125.05
1	110070411	1	7	2	792	1	2	1	5.22656	0	1	450	0	3.33333	1.66667	0	21.4286	0	250	64.2857	750.447
1	110070411	1	7	2	792	2	2	1	5.22656	0	1	550	0	64.2857	0	0	64.2857	0	150	3.33333	801.867
1	110070461	1	7	2	793	1	2	1	4.4052	0	1	350	0	21.4286	21.4286	0	0	0	350	21.4286	721.121
1	110070461	1	7	2	793	2	2	1	4.4052	0	1	450	0	7.14286	21.4286	21.4286	10	0	350	7.14286	824.293
1	110070471	1	7	2	794	1	2	0	4.42984	1	1	0	0	0	0	0	0	0	0	0	0
1	110070471	1	7	2	794	2	2	0	4.42984	1	1	0	0	0	0	0	0	0	0	0	0
1	110070491	1	7	3	768	1	2	1	4.87337	0	1	650	0	50	0	0	64.2857	21.4286	450	21.4286	1190.85
1	110070491	1	7	3	768	2	2	1	4.87337	0	1	650	0	21.4286	0	196.429	196.429	0	64.2857	7.14286	1081.11
1	110070511	1	7	3	769	1	2	1	4.99658	#NULL!	1	250	0	250	0	107.143	150	0	450	10	1113.54
1	110070511	1	7	3	769	2	2	1	4.99658	#NULL!	1	0	0	0	0	0	0	0	0	0	0
1	110070521	1	7	3	770	1	2	1	5.2512	#NULL!	1	196.429	0	3.33333	0	0	0	0	0	0	199.425
1	110070521	1	7	3	770	2	2	1	5.2512	#NULL!	1	450	1.66667	150	1.66667	1.66667	1.66667	1.66667	1.66667	1.66667	595.442
1	110070591	1	7	3	771	1	2	1	5.1937	1	1	150	0	64.2857	64.2857	21.4286	64.2857	0	650	196.429	1091.34
1	110070591	1	7	3	771	2	2	1	5.1937	1	1	64.2857	0	21.4286	64.2857	5	21.4286	0	1100	64.2857	1207.31
1	110070601	1	7	3	772	1	2	1	4.77755	1	1	350	0	1.66667	39.2857	0	64.2857	0	350	64.2857	813.734
1	110070601	1	7	3	772	2	2	1	4.77755	1	1	350	0	21.4286	64.2857	0	21.4286	0	250	21.4286	693.221
1	110070631	1	7	3	773	1	2	0	4.62423	#NULL!	1	250	0	64.2857	0	0	21.4286	0	64.2857	64.2857	437.564
1	110070631	1	7	3	773	2	2	0	4.62423	#NULL!	1	550	0	21.4286	10	0	64.2857	0	64.2857	10	702.13
1	110070651	1	7	3	774	1	2	1	4.57769	1	1	250	107.143	21.4286	0	1.66667	250	1.66667	196.429	21.4286	795.073
1	110070651	1	7	3	774	2	2	1	4.57769	1	1	350	21.4286	50	39.2857	39.2857	50	0	21.4286	21.4286	571.379
1	110070671	1	7	3	775	1	2	1	4.43806	1	1	850	1.66667	8.33333	50	3.33333	3.33333	5	117.857	10	1032.56
1	110070671	1	7	3	775	2	2	1	4.43806	1	1	850	0	35.7143	35.7143	21.4286	3.33333	5	107.143	64.2857	1092.74
1	110070681	1	7	3	776	1	2	1	4.65708	0	1	550	21.4286	0	0	35.7143	0	35.7143	450	107.143	1125.06
1	110070681	1	7	3	776	2	2	1	4.65708	0	1	250	0	250	0	150	107.143	0	450	21.4286	1122.75
1	110070711	1	7	3	777	1	2	0	5.22382	0	1	350	350	8.33333	0	0	10	0	16.6667	250	937.942
1	110070711	1	7	3	777	2	2	0	5.22382	0	1	350	250	0	0	0	10	0	21.4286	117.857	725.393
1	110070721	1	7	3	778	1	2	0	4.42984	1	1	0	0	0	0	0	0	0	0	0	0
1	110070721	1	7	3	778	2	2	0	4.42984	1	1	0	0	0	0	0	0	0	0	0	0
1	110080071	1	8	1	955	1	1	1	3.90144	1	2	550	0	0	0	64.2857	107.143	0	350	107.143	1103.8
1	110080071	1	8	1	955	2	1	1	3.90144	1	2	650	0	16.6667	0	192.857	23.3333	0	350	21.4286	1186.88
1	110080091	1	8	1	956	1	1	1	4.20808	0	4	510.714	10	7.14286	0	0	117.857	0	0	350	921.819
1	110080091	1	8	1	956	2	1	1	4.20808	0	4	117.857	21.4286	21.4286	0	0	117.857	0	0	0	263.421
1	110080121	1	8	1	957	1	1	0	4.19439	1	4	450	0	50	1.66667	1.66667	10	0	16.6667	16.6667	535.673
1	110080121	1	8	1	957	2	1	0	4.19439	1	4	350	0	50	3.33333	5	107.143	0	50	250	749.727
1	110080131	1	8	2	908	1	1	1	3.94251	#NULL!	2	750	5	10	0	64.2857	64.2857	0	275	64.2857	1177.11
1	110080131	1	8	2	908	2	1	1	3.94251	#NULL!	2	950	21.4286	10	0	21.4286	21.4286	0	196.429	64.2857	1247.25
1	110080171	1	8	2	909	1	1	0	4.27926	0	4	450	0	35.7143	0	5	16.6667	0	250	35.7143	754.432
1	110080171	1	8	2	909	2	1	0	4.27926	0	4	750	0	107.143	1.66667	1.66667	107.143	0	350	107.143	1346.42
1	110080181	1	8	2	910	1	1	1	4.07666	0	2	350	0	250	16.6667	21.4286	64.2857	0	107.143	64.2857	816.421
1	110080181	1	8	2	910	2	1	1	4.07666	0	2	850	0	35.7143	21.4286	64.2857	64.2857	0	196.429	1.66667	1194.35
1	110080191	1	8	2	911	1	1	1	3.7974	#NULL!	2	350	0	0	0	0	150	0	450	21.4286	903.543
1	110080191	1	8	2	911	2	1	1	3.7974	#NULL!	2	350	0	10	1.66667	0	21.4286	0	150	10	522.091
1	110080201	1	8	2	912	1	1	1	3.89596	0	2	550	0	21.4286	0	0	350	0	64.2857	21.4286	955.979
1	110080201	1	8	2	912	2	1	1	3.89596	0	2	550	1.66667	21.4286	1.66667	1.66667	117.857	1.66667	117.857	21.4286	803.503
1	110080291	1	8	3	906	1	1	0	3.82752	0	2	250	21.4286	250	10	16.6667	64.2857	0	150	0	712.105
1	110080291	1	8	3	906	2	1	0	3.82752	0	2	250	35.7143	64.2857	0	16.6667	150	0	350	0	804.605
1	110080301	1	8	3	907	1	1	0	4.16153	0	4	650	0	0	1.66667	5	107.143	0	0	107.143	840.141
1	110080301	1	8	3	907	2	1	0	4.16153	0	4	450	1.66667	3.33333	1.66667	1.66667	21.4286	1.66667	1.66667	10	488.076
1	110080361	1	8	4	900	1	1	1	3.8412	0	2	450	0	16.6667	0	0	16.6667	0	150	0	613.917
1	110080361	1	8	4	900	2	1	1	3.8412	0	2	450	0	21.4286	0	1.66667	107.143	0	150	0	700.195
1	110080391	1	8	4	902	1	1	1	3.86858	0	4	550	1.66667	3.33333	1.66667	3.33333	321.429	1.66667	1100	196.429	1992.82
1	110080391	1	8	4	902	2	1	1	3.86858	0	4	1100	0	21.4286	0	3.33333	3.33333	0	450	117.857	1625.06
1	110080401	1	8	4	903	1	1	0	3.75086	0	2	550	1.66667	21.4286	21.4286	1.66667	21.4286	1.66667	150	117.857	845.824
1	110080401	1	8	4	903	2	1	0	3.75086	0	2	0	0	3.33333	3.33333	1.66667	3.33333	0	150	117.857	242.422
1	110080421	1	8	4	904	1	1	0	3.83025	0	2	1100	0	35.7143	0	0	150	0	350	0	1578.51
1	110080421	1	8	4	904	2	1	0	3.83025	0	2	550	0	10	0	0	107.143	0	0	21.4286	672.09
1	110080461	1	8	4	905	1	1	1	3.89596	#NULL!	4	250	0	1.66667	0	0	5	0	250	1.66667	480.828
1	110080461	1	8	4	905	2	1	1	3.89596	#NULL!	4	450	0	10	0	0	1.66667	0	450	1.66667	864.153
1	110080541	1	8	5	888	1	1	0	4.73648	0	2	250	1.66667	35.7143	1.66667	10	64.2857	1.66667	10	50	403.266
1	110080541	1	8	5	888	2	1	0	4.73648	0	2	450	0	10	0	5	10	0	21.4286	64.2857	544.696
1	110080551	1	8	5	889	1	1	0	4.54483	1	4	650	0	50	3.33333	5	350	0	0	150	1138.37
1	110080551	1	8	5	889	2	1	0	4.54483	1	4	450	0	64.2857	64.2857	5	150	0	64.2857	0	766.827
1	110080561	1	8	5	890	1	1	1	4.7885	0	4	350	0	150	0	0	350	0	10	0	805.29
1	110080561	1	8	5	890	2	1	1	4.7885	0	4	550	0	0	64.2857	0	64.2857	0	150	10	813.237
1	110080581	1	8	5	891	1	1	0	4.52019	0	4	350	0	10	0	21.4286	250	0	16.6667	150	739.533
1	110080581	1	8	5	891	2	1	0	4.52019	0	4	550	0	107.143	0	196.429	196.429	0	0	107.143	1083.5
1	110080591	1	8	5	892	1	1	0	5.18549	1	2	150	1.66667	1.66667	1.66667	1.66667	39.2857	0	7.14286	117.857	295.222
1	110080591	1	8	5	892	2	1	0	5.18549	1	2	450	0	21.4286	0	3.33333	21.4286	0	0	64.2857	544.511
1	110080601	1	8	5	893	1	1	1	4.67077	#NULL!	2	650	107.143	10	0	64.2857	64.2857	0	0	150	1004.27
1	110080601	1	8	5	893	2	1	1	4.67077	#NULL!	2	450	64.2857	10	0	21.4286	117.857	0	0	150	771.247
1	110080611	1	8	5	894	1	1	0	5.15811	0	2	550	0	0	0	0	0	0	117.857	250	862.364
1	110080611	1	8	5	894	2	1	0	5.15811	0	2	450	0	0	0	0	0	0	150	64.2857	637.329
1	110080631	1	8	5	895	1	1	0	5.21561	1	4	196.429	0	64.2857	50	1.66667	250	0	150	23.3333	681.115
1	110080631	1	8	5	895	2	1	0	5.21561	1	4	350	0	35.7143	0	23.3333	0	0	117.857	16.6667	521.898
1	110080641	1	8	5	896	1	1	0	5.16906	1	2	450	0	21.4286	0	150	21.4286	0	150	21.4286	772.779
1	110080641	1	8	5	896	2	1	0	5.16906	1	2	950	0	21.4286	0	64.2857	21.4286	0	10	21.4286	1071.85
1	110080691	1	8	5	897	1	1	0	4.67625	1	4	350	64.2857	10	0	10	64.2857	0	64.2857	64.2857	599.966
1	110080691	1	8	5	897	2	1	0	4.67625	1	4	250	21.4286	0	0	21.4286	64.2857	0	107.143	21.4286	461.093
1	110080921	1	8	5	898	1	1	1	4.49281	0	2	550	0	0	0	0	16.6667	0	150	64.2857	752.162
1	110080921	1	8	5	898	2	1	1	4.49281	0	2	550	0	64.2857	0	0	150	0	250	150	1088.99
1	110080931	1	8	5	899	1	1	0	5.15537	1	2	350	0	35.7143	0	107.143	107.143	0	350	5	889.219
1	110080931	1	8	5	899	2	1	0	5.15537	1	2	250	0	21.4286	0	16.6667	107.143	0	350	8.33333	699.155
1	110080701	1	8	6	882	1	1	0	5.295	#NULL!	2	350	0	21.4286	10	10	21.4286	0	450	107.143	898.09
1	110080701	1	8	6	882	2	1	0	5.295	#NULL!	2	250	5	21.4286	0	5	10	0	450	21.4286	707.622
1	110080731	1	8	6	883	1	1	1	4.44901	0	4	350	0	0	0	10	107.143	0	64.2857	64.2857	564.897
1	110080731	1	8	6	883	2	1	1	4.44901	0	4	750	0	0	0	0	0	0	0	0	750
1	110080741	1	8	6	884	1	1	0	5.33607	#NULL!	2	350	0	1.66667	1.66667	64.2857	3.33333	0	250	21.4286	654.186
1	110080741	1	8	6	884	2	1	0	5.33607	#NULL!	2	35.7143	0	35.7143	35.7143	21.4286	107.143	1.66667	550	21.4286	728.371
1	110080781	1	8	6	885	1	1	0	5.33607	0	4	350	0	21.4286	0	16.6667	250	0	350	16.6667	933.198
1	110080781	1	8	6	885	2	1	0	5.33607	0	4	650	0	35.7143	0	21.4286	107.143	0	250	0	1019.91
1	110080811	1	8	6	886	1	1	0	5.33607	0	2	850	1.66667	1.66667	1.66667	1.66667	150	0	107.143	1.66667	1086.95
1	110080811	1	8	6	886	2	1	0	5.33607	0	2	550	1.66667	16.6667	0	10	16.6667	1.66667	150	64.2857	779.1
1	110080831	1	8	6	887	1	1	0	5.34976	0	4	1100	0	5	5	64.2857	5	0	450	8.33333	1579.92
1	110080831	1	8	6	887	2	1	0	5.34976	0	4	950	0	16.6667	16.6667	107.143	16.6667	0	250	5	1318.67
1	110090071	1	9	1	1059	1	2	1	3.64134	0	1	850	1.66667	350	0	1.66667	117.857	1.66667	1.66667	64.2857	1328.85
1	110090071	1	9	1	1059	2	2	1	3.64134	0	1	950	1.66667	150	35.7143	1.66667	196.429	1.66667	1.66667	117.857	1398.69
1	110090081	1	9	1	1060	1	2	0	3.70157	0	1	450	0	10	0	10	150	0	250	21.4286	842.573
1	110090081	1	9	1	1060	2	2	0	3.70157	0	1	250	1.66667	1.66667	1.66667	10	21.4286	1.66667	150	150	542.475
1	110090101	1	9	1	1061	1	2	1	3.52088	#NULL!	1	550	0	35.7143	0	5	64.2857	0	10	5	656.821
1	110090101	1	9	1	1061	2	2	1	3.52088	#NULL!	1	750	1.66667	7.14286	1.66667	0	117.857	1.66667	117.857	3.33333	974.204
1	110090111	1	9	1	1062	1	2	0	3.59754	0	1	950	0	21.4286	0	10	650	0	0	250	1763.6
1	110090111	1	9	1	1062	2	2	0	3.59754	0	1	950	0	21.4286	21.4286	16.6667	650	0	0	250	1790.71
1	110090231	1	9	2	1020	1	2	0	3.96988	1	1	750	0	0	0	0	16.6667	0	107.143	150	984.819
1	110090231	1	9	2	1020	2	2	0	3.96988	1	1	650	0	16.6667	0	0	16.6667	0	196.429	0	855.424
1	110090251	1	9	2	1021	1	2	0	3.83847	#NULL!	1	550	1.66667	16.6667	1.66667	5	1.66667	1.66667	350	350	1178.35
1	110090251	1	9	2	1021	2	2	0	3.83847	#NULL!	1	350	0	21.4286	21.4286	0	0	117.857	35.7143	5	529.083
1	110090271	1	9	2	1022	1	2	0	4.11773	0	1	550	0	10	35.7143	0	117.857	0	250	150	1046.94
1	110090271	1	9	2	1022	2	2	0	4.11773	0	1	550	0	21.4286	0	0	0	0	150	150	827.564
1	110090351	1	9	2	1023	1	2	1	4.03012	0	1	150	0	107.143	0	3.33333	150	0	250	196.429	768.911
1	110090351	1	9	2	1023	2	2	1	4.03012	0	1	550	0	107.143	0	21.4286	107.143	0	450	107.143	1251.64
1	110090361	1	9	2	1024	1	2	0	4.31759	1	1	192.857	1.66667	1.66667	1.66667	1.66667	350	10	16.6667	350	824.044
1	110090361	1	9	2	1024	2	2	0	4.31759	1	1	275	0	35.7143	0	0	350	0	450	50	1062.31
1	110090371	1	9	2	1025	1	2	0	3.87406	0	1	350	0	16.6667	0	10	64.2857	0	550	16.6667	936.538
1	110090371	1	9	2	1025	2	2	0	3.87406	0	1	550	0	16.6667	0	5	117.857	0	550	0	1166
1	110090381	1	9	2	1026	1	2	0	3.86311	0	1	550	1.66667	7.14286	1.66667	1.66667	1.66667	1.66667	1.66667	550	1021.03
1	110090381	1	9	2	1026	2	2	0	3.86311	0	1	950	0	39.2857	0	0	0	0	0	0	985.318
1	110090411	1	9	2	1027	1	2	0	4.24093	#NULL!	1	550	1.66667	21.4286	1.66667	10	5	1.66667	1.66667	10	597.089
1	110090411	1	9	2	1027	2	2	0	4.24093	#NULL!	1	1100	0	64.2857	0	16.6667	16.6667	0	35.7143	8.33333	1226.19
1	110090431	1	9	2	1028	1	2	0	4.01916	0	1	250	21.4286	21.4286	0	1.66667	117.857	0	350	0	709.938
1	110090431	1	9	2	1028	2	2	0	4.01916	0	1	550	64.2857	35.7143	0	21.4286	64.2857	0	196.429	64.2857	951.321
1	110090471	1	9	3	1007	1	2	1	4.83231	1	1	50	0	21.4286	7.14286	1.66667	117.857	0	150	21.4286	334.545
1	110090471	1	9	3	1007	2	2	1	4.83231	1	1	250	0	10	1.66667	5	64.2857	0	150	21.4286	474.117
1	110090481	1	9	3	1008	1	2	1	5.28679	#NULL!	1	550	1.66667	35.7143	1.66667	10	235.714	1.66667	192.857	35.7143	1007.48
1	110090481	1	9	3	1008	2	2	1	5.28679	#NULL!	1	650	0	50	0	10	107.143	0	196.429	35.7143	1004.33
1	110090531	1	9	3	1009	1	2	0	5.20739	1	1	117.857	0	350	0	0	0	0	64.2857	196.429	652.621
1	110090531	1	9	3	1009	2	2	0	5.20739	1	1	35.7143	0	8.33333	350	0	64.2857	0	21.4286	10	474.357
1	110090591	1	9	3	1010	1	2	0	4.81588	0	1	550	0	7.14286	0	0	0	0	150	150	814.721
1	110090591	1	9	3	1010	2	2	0	4.81588	0	1	950	0	39.2857	0	0	0	0	150	150	1243.62
1	110090611	1	9	3	1011	1	2	0	4.59959	0	1	750	0	235.714	1.66667	64.2857	21.4286	3.33333	196.429	196.429	1380.61
1	110090611	1	9	3	1011	2	2	0	4.59959	0	1	350	117.857	10	0	0	64.2857	10	64.2857	21.4286	617.858
1	110090641	1	9	3	1012	1	2	0	3.76728	0	1	196.429	0	21.4286	0	7.14286	250	35.7143	0	21.4286	493.321
1	110090641	1	9	3	1012	2	2	0	3.76728	0	1	107.143	0	64.2857	0	107.143	107.143	64.2857	21.4286	64.2857	483.321
1	110090661	1	9	4	1000	1	2	0	4.52293	0	1	250	0	64.2857	21.4286	64.2857	64.2857	0	107.143	196.429	701.479
1	110090661	1	9	4	1000	2	2	0	4.52293	0	1	350	0	21.4286	21.4286	64.2857	64.2857	0	150	150	762.821
1	110090681	1	9	4	1001	1	2	1	5.30048	0	1	950	1.66667	3.33333	1.66667	1.66667	1.66667	1.66667	150	64.2857	1148.05
1	110090681	1	9	4	1001	2	2	1	5.30048	0	1	550	1.66667	1.66667	1.66667	1.66667	1.66667	10	35.7143	250	805.399
1	110090701	1	9	4	1002	1	2	1	4.43532	0	1	250	7.14286	250	35.7143	0	196.429	0	64.2857	64.2857	802.764
1	110090701	1	9	4	1002	2	2	1	4.43532	0	1	650	0	35.7143	35.7143	23.3333	21.4286	0	10	50	807.502
1	110090721	1	9	4	1003	1	2	1	4.51198	0	1	850	1.66667	0	0	3.33333	117.857	0	35.7143	0	991.433
1	110090721	1	9	4	1003	2	2	1	4.51198	0	1	950	0	0	0	10	10	0	10	0	976.68
1	110090741	1	9	4	1004	1	2	1	4.49008	#NULL!	1	850	0	150	0	0	196.429	0	150	16.6667	1307.57
1	110090741	1	9	4	1004	2	2	1	4.49008	#NULL!	1	432.143	0	450	0	0	250	0	107.143	21.4286	1172.72
1	110090781	1	9	4	1005	1	2	1	4.81588	0	1	350	1.66667	3.33333	1.66667	21.4286	150	0	150	21.4286	660.597
1	110090781	1	9	4	1005	2	2	1	4.81588	0	1	450	0	0	0	10	150	0	150	21.4286	744.183
1	110090801	1	9	4	1006	1	2	1	4.3614	0	1	350	0	64.2857	0	0	64.2857	0	50	64.2857	562.936
1	110090801	1	9	4	1006	2	2	1	4.3614	0	1	750	0	10	0	0	0	0	0	50	800.39
1	110090951	1	9	5	998	1	2	1	5.32238	1	1	550	1.66667	150	1.66667	1.66667	250	250	0	250	1336.64
1	110090951	1	9	5	998	2	2	1	5.32238	1	1	350	0	117.857	0	0	250	0	0	250	885.454
1	110090971	1	9	5	999	1	2	0	4.57221	1	1	107.143	0	350	0	117.857	117.857	0	21.4286	196.429	812.671
1	110090971	1	9	5	999	2	2	0	4.57221	1	1	450	0	450	0	0	192.857	0	275	150	1396.24
1	120100061	1	10	1	1168	1	1	1	4.09856	1	2	278.571	1.66667	7.14286	1.66667	1.66667	235.714	235.714	50	107.143	838.053
1	120100061	1	10	1	1168	2	1	1	4.09856	1	2	0	0	0	0	0	0	0	0	0	0
1	120100411	1	10	3	1107	1	1	1	4.6872	0	2	450	0	5	35.7143	16.6667	16.6667	0	0	250	726.419
1	120100411	1	10	3	1107	2	1	1	4.6872	0	2	450	0	16.6667	107.143	35.7143	196.429	0	0	0	777.448
1	120100421	1	10	3	1108	1	1	1	5.02396	0	2	350	64.2857	1.66667	1.66667	8.33333	0	1.66667	117.857	5	535.691
1	120100421	1	10	3	1108	2	1	1	5.02396	0	2	450	64.2857	3.33333	3.33333	8.33333	10	0	64.2857	10	602.536
1	120100581	1	10	3	1109	1	1	0	4.72553	0	2	950	550	235.714	0	471.429	0	0	150	250	2469.2
1	120100581	1	10	3	1109	2	1	0	4.72553	0	2	450	0	192.857	0	0	450	0	250	107.143	1336.09
1	120100601	1	10	4	1098	1	1	0	4.62971	0	2	550	16.6667	150	150	0	10	0	350	0	1171.8
1	120100601	1	10	4	1098	2	1	0	4.62971	0	2	350	16.6667	250	117.857	0	35.7143	0	250	35.7143	992.936
1	120100681	1	10	4	1099	1	1	1	4.34497	#NULL!	2	550	3.33333	150	0	21.4286	39.2857	3.33333	39.2857	117.857	877.694
1	120100681	1	10	4	1099	2	1	1	4.34497	#NULL!	2	350	107.143	150	0	35.7143	150	0	64.2857	196.429	977.071
1	120100711	1	10	4	1100	1	1	1	4.84873	1	4	0	0	0	0	0	0	0	0	0	0
1	120100711	1	10	4	1100	2	1	1	4.84873	1	4	0	0	0	0	21.4286	0	0	117.857	0	124.307
1	120100741	1	10	4	1101	1	1	1	4.60233	#NULL!	2	750	1.66667	16.6667	1.66667	1.66667	1.66667	16.6667	650	64.2857	1420.08
1	120100741	1	10	4	1101	2	1	1	4.60233	#NULL!	2	550	0	8.33333	8.33333	8.33333	64.2857	0	350	10	951.503
1	120100761	1	10	4	1102	1	1	0	4.48734	0	2	150	0	21.4286	0	10	35.7143	0	650	10	799.27
1	120100761	1	10	4	1102	2	1	0	4.48734	0	2	250	0	10	0	10	21.4286	0	350	10	608.081
1	110110041	1	11	1	1275	1	1	0	3.72074	#NULL!	5	450	0	3.33333	0	1.66667	21.4286	0	250	107.143	785.756
1	110110041	1	11	1	1275	2	1	0	3.72074	#NULL!	5	550	0	64.2857	0	0	10	0	250	0	840.193
1	110110061	1	11	2	1223	1	1	0	4.1232	0	3	1.66667	1.66667	107.143	1.66667	16.6667	107.143	1.66667	117.857	196.429	480.851
1	110110061	1	11	2	1223	2	1	0	4.1232	0	3	250	0	107.143	0	16.6667	107.143	0	250	196.429	842.555
1	110110071	1	11	2	1224	1	1	1	3.94798	#NULL!	3	150	7.14286	21.4286	0	0	64.2857	0	250	64.2857	510.343
1	110110071	1	11	2	1224	2	1	1	3.94798	#NULL!	3	450	1.66667	64.2857	1.66667	1.66667	864.286	1.66667	7.14286	192.857	1449.32
1	110110081	1	11	2	1225	1	1	1	3.92334	0	5	550	0	3.33333	0	0	10	0	0	450	934.497
1	110110081	1	11	2	1225	2	1	1	3.92334	0	5	850	0	16.6667	0	0	10	0	64.2857	64.2857	984.583
1	110110091	1	11	2	1226	1	1	1	4.34771	0	5	250	0	0	0	0	350	0	450	64.2857	1017.03
1	110110091	1	11	2	1226	2	1	1	4.34771	0	5	550	0	1.66667	1.66667	10	107.143	0	450	0	1059.65
1	110110121	1	11	2	1227	1	1	0	4.13415	1	3	350	0	150	21.4286	35.7143	150	0	10	250	887.076
1	110110121	1	11	2	1227	2	1	0	4.13415	1	3	250	5	250	8.33333	16.6667	16.6667	5	16.6667	350	826.612
1	110110171	1	11	2	1228	1	1	1	4.22724	0	5	250	1.66667	7.14286	1.66667	8.33333	10	1.66667	196.429	35.7143	482.632
1	110110171	1	11	2	1228	2	1	1	4.22724	0	5	1100	7.14286	7.14286	1.66667	7.14286	1.66667	1.66667	64.2857	21.4286	1199.67
1	110110181	1	11	2	1229	1	1	1	4.06023	1	3	350	0	16.6667	50	1.66667	3.33333	0	3.33333	250	628.903
1	110110181	1	11	2	1229	2	1	1	4.06023	1	3	450	1.66667	1.66667	150	1.66667	10	1.66667	10	250	829.427
1	110110191	1	11	2	1230	1	1	1	4.3833	1	5	150	0	150	0	0	21.4286	0	0	64.2857	357.15
1	110110191	1	11	2	1230	2	1	1	4.3833	1	5	450	0	117.857	0	0	3.33333	0	0	0	558.92
1	110110201	1	11	2	1231	1	1	1	3.92608	#NULL!	5	550	0	0	0	0	0	0	0	0	550
1	110110201	1	11	2	1231	2	1	1	3.92608	#NULL!	5	950	0	0	0	1.66667	10	0	0	0	960.373
1	110110221	1	11	2	1232	1	1	0	3.69884	#NULL!	3	850	0	21.4286	0	0	107.143	0	350	107.143	1366.24
1	110110221	1	11	2	1232	2	1	0	3.69884	#NULL!	3	550	107.143	7.14286	1.66667	1.66667	16.6667	0	350	250	1201.31
1	110110281	1	11	2	1233	1	1	1	3.60849	0	3	250	0	150	0	64.2857	0	0	117.857	107.143	635.757
1	110110281	1	11	2	1233	2	1	1	3.60849	0	3	0	0	0	0	0	0	0	0	0	0
1	110110301	1	11	3	1201	1	1	0	4.98015	0	3	250	0	64.2857	0	10	196.429	0	450	0	893.754
1	110110301	1	11	3	1201	2	1	0	4.98015	0	3	150	1.66667	150	64.2857	1.66667	21.4286	1.66667	550	150	988.053
1	110110311	1	11	3	1202	1	1	0	4.71184	0	3	350	1.66667	50	1.66667	1.66667	64.2857	1.66667	107.143	107.143	642.903
1	110110311	1	11	3	1202	2	1	0	4.71184	0	3	250	1.66667	150	1.66667	5	5	1.66667	117.857	107.143	592.564
1	110110331	1	11	3	1203	1	1	1	4.5065	0	3	350	0	64.2857	0	10	21.4286	0	0	10	443.984
1	110110331	1	11	3	1203	2	1	1	4.5065	0	3	450	0	107.143	0	0	107.143	0	0	21.4286	659.421
1	110110381	1	11	3	1204	1	1	1	4.9473	0	5	450	0	0	0	0	150	0	550	0	1075.2
1	110110381	1	11	3	1204	2	1	1	4.9473	0	5	432.143	0	0	0	16.6667	0	0	250	0	670.376
1	110110411	1	11	3	1205	1	1	0	5.0705	0	3	650	0	0	0	64.2857	5	0	250	350	1224.58
1	110110411	1	11	3	1205	2	1	0	5.0705	0	3	750	0	0	0	107.143	35.7143	0	350	350	1479.2
1	110110421	1	11	3	1206	1	1	1	4.97467	0	5	350	1.66667	1.66667	21.4286	1.66667	3.33333	1.66667	150	64.2857	567.596
1	110110421	1	11	3	1206	2	1	1	4.97467	0	5	450	0	0	107.143	0	35.7143	0	150	150	846.157
1	110110431	1	11	3	1207	1	1	1	4.76386	#NULL!	3	550	1.66667	150	0	1.66667	275	0	117.857	64.2857	1091.33
1	110110431	1	11	3	1207	2	1	1	4.76386	#NULL!	3	850	5	192.857	16.6667	1.66667	746.429	0	1100	235.714	2889.24
1	110110441	1	11	3	1208	1	1	1	4.61875	0	3	450	0	150	0	35.7143	35.7143	0	0	0	648.207
1	110110441	1	11	3	1208	2	1	1	4.61875	0	3	750	0	35.7143	0	192.857	3.33333	0	0	0	955.56
1	110110451	1	11	3	1209	1	1	1	5.26215	0	3	750	5	3.33333	0	5	21.4286	5	150	64.2857	973.162
1	110110451	1	11	3	1209	2	1	1	5.26215	0	3	450	10	10	10	21.4286	107.143	5	107.143	21.4286	711.059
1	110110461	1	11	3	1210	1	1	1	4.57221	1	3	150	1.66667	107.143	0	1.66667	64.2857	1.66667	7.14286	64.2857	367.738
1	110110461	1	11	3	1210	2	1	1	4.57221	1	3	50	1.66667	21.4286	1.66667	1.66667	21.4286	1.66667	39.2857	3.33333	132.455
1	110110471	1	11	3	1211	1	1	1	5.31417	#NULL!	5	0	0	0	0	0	0	0	0	0	0
1	110110471	1	11	3	1211	2	1	1	5.31417	#NULL!	5	0	0	0	0	0	0	0	0	0	0
1	110110481	1	11	3	1212	1	1	1	4.48734	0	5	550	0	0	0	0	64.2857	0	64.2857	64.2857	717.914
1	110110481	1	11	3	1212	2	1	1	4.48734	0	5	550	0	3.33333	0	0	64.2857	0	64.2857	64.2857	720.911
1	110110511	1	11	3	1213	1	1	0	5.03491	0	3	250	0	21.4286	0	0	64.2857	0	150	64.2857	513.807
1	110110511	1	11	3	1213	2	1	0	5.03491	0	3	350	0	21.4286	0	0	64.2857	0	150	64.2857	613.807
1	110110521	1	11	3	1214	1	1	1	5.3525	0	3	450	1.66667	1.66667	196.429	10	16.6667	1.66667	250	117.857	993.837
1	110110521	1	11	3	1214	2	1	1	5.3525	0	3	450	1.66667	1.66667	107.143	1.66667	1.66667	3.33333	250	3.33333	791.351
1	110110601	1	11	4	1199	1	1	1	4.33949	1	3	150	0	64.2857	0	10	150	0	250	64.2857	626.861
1	110110601	1	11	4	1199	2	1	1	4.33949	1	3	350	0	21.4286	0	10	21.4286	0	250	64.2857	673.904
1	110110621	1	11	4	1200	1	1	0	4.65708	0	5	350	0	0	0	0	250	0	0	250	779.5
1	110110621	1	11	4	1200	2	1	0	4.65708	0	5	250	0	0	0	10	117.857	0	0	150	487.933
1	120210021	1	21	1	2179	1	2	0	3.50445	0	1	450	0	0	0	10	16.6667	0	550	0	965.373
1	120210021	1	21	1	2179	2	2	0	3.50445	0	1	450	0	0	0	21.4286	0	0	550	0	960.643
1	120210031	1	21	1	2180	1	2	1	4.01643	0	1	650	0	64.2857	64.2857	0	275	0	23.3333	35.7143	1066.62
1	120210031	1	21	1	2180	2	2	1	4.01643	0	1	1100	0	107.143	107.143	35.7143	196.429	0	0	10	1517.07
1	120210051	1	21	1	2181	1	2	0	3.83299	0	1	50	35.7143	0	64.2857	10	150	0	550	107.143	872.076
1	120210051	1	21	1	2181	2	2	0	3.83299	0	1	150	1.66667	16.6667	64.2857	0	150	0	350	21.4286	694.434
1	120210061	1	21	1	2182	1	2	1	3.76728	0	1	650	1.66667	1.66667	1.66667	1.66667	7.14286	1.66667	3.33333	21.4286	684.817
1	120210061	1	21	1	2182	2	2	1	3.76728	0	1	450	1.66667	1.66667	1.66667	1.66667	16.6667	1.66667	117.857	35.7143	607.506
1	120210071	1	21	1	2183	1	2	0	3.76728	0	1	650	1.66667	1.66667	1.66667	1.66667	7.14286	1.66667	3.33333	21.4286	684.817
1	120210071	1	21	1	2183	2	2	0	3.76728	0	1	450	1.66667	1.66667	1.66667	3.33333	3.33333	1.66667	117.857	35.7143	597.112
1	120210101	1	21	1	2184	1	2	1	3.70705	0	1	350	0	21.4286	7.14286	1.66667	35.7143	0	117.857	107.143	603.673
1	120210101	1	21	1	2184	2	2	1	3.70705	0	1	450	1.66667	10	10	10	10	1.66667	250	117.857	810.831
1	120210161	1	21	1	2185	1	2	0	4.68994	0	1	275	7.14286	450	0	0	21.4286	0	50	10	758.737
1	120210161	1	21	1	2185	2	2	0	4.68994	0	1	250	0	39.2857	0	0	64.2857	0	117.857	35.7143	477.468
1	120210261	1	21	2	2143	1	2	0	4.45722	0	1	250	1.66667	21.4286	1.66667	21.4286	64.2857	1.66667	250	64.2857	626.915
1	120210261	1	21	2	2143	2	2	0	4.45722	0	1	250	10	1.66667	1.66667	10	21.4286	1.66667	350	150	729.6
1	120210271	1	21	2	2144	1	2	0	4.61328	0	1	550	0	0	0	5	5	0	450	117.857	1058.76
1	120210271	1	21	2	2144	2	2	0	4.61328	0	1	550	1.66667	1.66667	1.66667	1.66667	1.66667	1.66667	550	117.857	1148.51
1	120210301	1	21	2	2145	1	2	1	4.82957	1	1	350	0	10	0	0	196.429	0	0	250	740.811
1	120210301	1	21	2	2145	2	2	1	4.82957	1	1	450	0	16.6667	0	0	21.4286	0	150	117.857	715.74
1	120210311	1	21	2	2146	1	2	1	4.4846	1	1	0	0	50	0	64.2857	64.2857	0	0	117.857	256.579
1	120210311	1	21	2	2146	2	2	1	4.4846	1	1	350	0	50	0	150	0	0	150	21.4286	679.393
1	120210321	1	21	2	2147	1	2	0	4.29295	0	1	350	1.66667	5	1.66667	1.66667	35.7143	1.66667	150	21.4286	544.362
1	120210321	1	21	2	2147	2	2	0	4.29295	0	1	450	1.66667	10	1.66667	1.66667	10	1.66667	150	117.857	705.814
1	120210481	1	21	3	2124	1	2	1	4.90349	1	1	550	0	0	150	64.2857	21.4286	0	250	150	1122.1
1	120210481	1	21	3	2124	2	2	1	4.90349	1	1	550	0	0	250	1.66667	64.2857	0	150	64.2857	1043.52
1	120210491	1	21	3	2125	1	2	0	5.1718	1	1	250	21.4286	450	0	64.2857	107.143	0	275	150	1198.19
1	120210491	1	21	3	2125	2	2	0	5.1718	1	1	150	0	150	64.2857	64.2857	550	196.429	250	250	1496.21
1	120210501	1	21	3	2126	1	2	1	4.93908	#NULL!	1	250	0	64.2857	64.2857	0	250	0	250	250	1024.44
1	120210501	1	21	3	2126	2	2	1	4.93908	#NULL!	1	250	0	107.143	64.2857	0	196.429	0	250	35.7143	837.857
1	120210511	1	21	3	2127	1	2	0	4.94456	0	1	150	1.66667	1.66667	1.66667	1.66667	35.7143	1.66667	117.857	117.857	392.472
1	120210511	1	21	3	2127	2	2	0	4.94456	0	1	150	1.66667	5	1.66667	1.66667	21.4286	1.66667	150	64.2857	367.133
1	120210541	1	21	4	2120	1	2	1	5.10062	0	1	550	21.4286	21.4286	0	10	21.4286	0	64.2857	64.2857	729.283
1	120210541	1	21	4	2120	2	2	1	5.10062	0	1	0	0	0	0	0	0	0	0	0	0
1	120210551	1	21	4	2121	1	2	0	5.07598	1	1	150	0	107.143	64.2857	0	10	0	0	250	525.864
1	120210551	1	21	4	2121	2	2	0	5.07598	1	1	150	0	35.7143	107.143	0	150	0	0	107.143	510.393
1	130220261	1	22	2	2241	1	2	1	3.96441	1	1	250	0	64.2857	0	3.33333	3.33333	0	117.857	7.14286	424.985
1	130220261	1	22	2	2241	2	2	1	3.96441	1	1	150	0	117.857	0	21.4286	39.2857	0	250	3.33333	536.121
1	130220431	1	22	3	2220	1	2	0	3.86858	0	1	350	0	64.2857	0	0	107.143	0	107.143	107.143	687.65
1	130220431	1	22	3	2220	2	2	0	3.86858	0	1	350	0	64.2857	0	0	117.857	0	64.2857	64.2857	623.386
1	130220441	1	22	3	2221	1	2	1	3.6386	1	1	350	0	150	50	0	21.4286	0	0	39.2857	585.95
1	130220441	1	22	3	2221	2	2	1	3.6386	1	1	350	0	7.14286	21.4286	21.4286	21.4286	0	0	350	705.45
1	130220481	1	22	3	2222	1	2	0	3.58385	0	1	550	0	0	0	16.6667	64.2857	0	150	107.143	844.762
1	130220481	1	22	3	2222	2	2	0	3.58385	0	1	350	1.66667	16.6667	0	5	64.2857	5	117.857	21.4286	555.74
1	130220491	1	22	3	2223	1	2	0	3.58111	0	1	350	0	64.2857	0	0	64.2857	0	250	1.66667	689.887
1	130220491	1	22	3	2223	2	2	0	3.58111	0	1	650	0	50	0	0	150	10	150	0	971.25
1	130220641	1	22	4	2211	1	2	1	4.15606	1	1	350	16.6667	3.33333	1.66667	16.6667	35.7143	0	650	10	1007.2
1	130220641	1	22	4	2211	2	2	1	4.15606	1	1	350	10	10	0	0	10	10	117.857	10	500.224
1	130220651	1	22	4	2212	1	2	0	4.59411	0	1	450	0	21.4286	0	0	21.4286	0	64.2857	64.2857	599.036
1	130220651	1	22	4	2212	2	2	0	4.59411	0	1	450	0	35.7143	0	16.6667	107.143	0	275	275	1065.75
1	130220661	1	22	4	2213	1	2	1	4.66804	1	1	950	0	0	0	150	150	0	150	150	1474.4
1	130220661	1	22	4	2213	2	2	1	4.66804	1	1	550	0	150	0	0	64.2857	0	350	150	1179.16
1	130220671	1	22	4	2214	1	2	0	5.00205	0	1	450	0	0	0	0	10	0	150	10	601.28
1	130220671	1	22	4	2214	2	2	0	5.00205	0	1	450	0	0	0	0	35.7143	0	150	250	822.886
1	130220681	1	22	4	2215	1	2	0	4.96646	1	1	450	0	150	150	0	0	0	450	50	1177.05
1	130220681	1	22	4	2215	2	2	0	4.96646	1	1	350	0	150	0	0	150	0	350	150	1055.45
1	130220691	1	22	4	2216	1	2	1	4.21629	#NULL!	1	150	0	35.7143	3.33333	3.33333	16.6667	0	21.4286	250	429.344
1	130220691	1	22	4	2216	2	2	1	4.21629	#NULL!	1	350	1.66667	107.143	16.6667	5	64.2857	0	64.2857	64.2857	636.821
1	130220701	1	22	4	2217	1	2	1	3.88501	1	1	0	0	0	250	0	107.143	0	64.2857	150	524.529
1	130220701	1	22	4	2217	2	2	1	3.88501	1	1	64.2857	0	350	0	0	0	0	0	150	503.136
1	130220711	1	22	4	2218	1	2	0	5.05133	0	1	350	0	21.4286	0	0	64.2857	0	350	10	747.659
1	130220711	1	22	4	2218	2	2	0	5.05133	0	1	450	1.66667	64.2857	1.66667	1.66667	35.7143	1.66667	350	50	900.117
1	130220721	1	22	4	2219	1	2	1	4.41068	1	1	50	0	450	0	0	196.429	0	150	0	763.471
1	130220721	1	22	4	2219	2	2	1	4.41068	1	1	150	0	250	0	0	0	0	150	0	508.85
1	130230021	1	23	1	2355	1	2	0	3.61123	1	1	550	0	0	0	0	250	0	35.7143	0	804.429
1	130230021	1	23	1	2355	2	2	0	3.61123	1	1	550	0	16.6667	0	35.7143	250	0	150	16.6667	966.955
1	130230031	1	23	1	2356	1	2	0	3.66598	1	1	450	0	0	0	0	21.4286	0	50	21.4286	531.514
1	130230031	1	23	1	2356	2	2	0	3.66598	1	1	350	0	0	0	0	35.7143	0	50	0	426.486
1	130230041	1	23	1	2357	1	2	1	3.5154	0	1	450	0	35.7143	0	0	0	0	350	150	919.207
1	130230041	1	23	1	2357	2	2	1	3.5154	0	1	250	0	21.4286	0	0	0	0	196.429	0	444.871
1	130230051	1	23	1	2358	1	2	1	3.75359	1	1	550	0	0	0	0	10	0	35.7143	450	963.429
1	130230051	1	23	1	2358	2	2	1	3.75359	1	1	550	0	0	0	0	0	0	350	0	862.9
1	130230071	1	23	1	2359	1	2	0	3.7755	0	1	39.2857	0	150	21.4286	0	21.4286	0	350	64.2857	580.55
1	130230071	1	23	1	2359	2	2	0	3.7755	0	1	150	0	21.4286	64.2857	0	0	0	117.857	117.857	435.857
1	130230081	1	23	1	2360	1	2	1	3.66051	1	1	450	0	0	0	0	0	0	0	250	657
1	130230081	1	23	1	2360	2	2	1	3.66051	1	1	450	0	0	0	0	107.143	0	0	250	752.357
1	130230111	1	23	1	2361	1	2	0	3.77002	1	1	50	0	64.2857	0	0	0	0	196.429	196.429	446.043
1	130230111	1	23	1	2361	2	2	0	3.77002	1	1	250	0	64.2857	0	0	0	0	350	64.2857	673.921
1	130230131	1	23	1	2362	1	2	0	4.2026	1	1	350	0	250	35.7143	21.4286	64.2857	0	64.2857	250	950.736
1	130230131	1	23	1	2362	2	2	0	4.2026	1	1	450	0	50	3.33333	64.2857	0	0	0	250	762.079
1	130230151	1	23	1	2363	1	2	0	4.00821	0	1	350	0	5	0	0	10	0	450	0	765.695
1	130230151	1	23	1	2363	2	2	0	4.00821	0	1	350	0	0	0	0	3.33333	0	250	0	576.467
1	130230161	1	23	1	2364	1	2	0	3.71526	0	1	650	35.7143	0	0	21.4286	117.857	0	0	117.857	907.1
1	130230161	1	23	1	2364	2	2	0	3.71526	0	1	950	21.4286	0	0	10	150	0	21.4286	0	1132.9
1	130230191	1	23	1	2365	1	2	0	4.26557	#NULL!	1	650	1.66667	1.66667	21.4286	0	21.4286	0	250	10	925.229
1	130230191	1	23	1	2365	2	2	0	4.26557	#NULL!	1	550	0	64.2857	21.4286	0	0	0	250	10	860.787
1	130230201	1	23	1	2366	1	2	1	4.2245	#NULL!	1	350	1.66667	1.66667	1.66667	7.14286	7.14286	1.66667	3.33333	1.66667	373.295
1	130230201	1	23	1	2366	2	2	1	4.2245	#NULL!	1	350	0	0	0	5	5	0	0	0	358.87
1	130230301	1	23	2	2321	1	2	0	3.96988	0	1	550	0	107.143	0	0	10	0	250	0	878.721
1	130230301	1	23	2	2321	2	2	0	3.96988	0	1	650	0	16.6667	0	0	64.2857	0	450	0	1124.5
1	130230311	1	23	2	2322	1	2	1	4.91444	#NULL!	1	196.429	0	0	16.6667	0	107.143	0	196.429	117.857	581.479
1	130230311	1	23	2	2322	2	2	1	4.91444	#NULL!	1	432.143	0	35.7143	10	0	107.143	0	275	192.857	975.043
1	130230341	1	23	2	2323	1	2	0	4.76934	0	1	550	0	21.4286	0	10	107.143	0	150	35.7143	837.133
1	130230341	1	23	2	2323	2	2	0	4.76934	0	1	450	0	21.4286	0	16.6667	16.6667	0	250	21.4286	740.074
1	130230351	1	23	2	2324	1	2	0	4.73922	0	1	117.857	0	0	0	16.6667	16.6667	0	150	117.857	379.11
1	130230351	1	23	2	2324	2	2	0	4.73922	0	1	196.429	0	0	0	8.33333	23.3333	0	35.7143	196.429	419.133
1	130230361	1	23	2	2325	1	2	1	4.76112	0	1	650	0	16.6667	0	0	35.7143	0	10	10	713.989
1	130230361	1	23	2	2325	2	2	1	4.76112	0	1	650	0	16.6667	0	0	16.6667	0	35.7143	35.7143	741.317
1	130230381	1	23	2	2326	1	2	1	4.82409	0	1	21.4286	0	0	0	0	107.143	0	250	117.857	437.871
1	130230381	1	23	2	2326	2	2	1	4.82409	0	1	250	0	0	0	8.33333	16.6667	0	0	0	272.2
1	130230401	1	23	2	2327	1	2	0	4.9473	#NULL!	1	1100	0	78.5714	36.6667	0	10	0	7.14286	7.14286	1228.14
1	130230401	1	23	2	2327	2	2	0	4.9473	#NULL!	1	550	0	196.429	0	0	10	0	10	117.857	842.015
1	130230411	1	23	2	2328	1	2	1	4.69815	1	1	1100	0	0	0	0	64.2857	0	350	10	1478.39
1	130230411	1	23	2	2328	2	2	1	4.69815	1	1	650	0	0	0	0	21.4286	0	450	10	1079.65
1	130230421	1	23	2	2329	1	2	1	5.16906	#NULL!	1	850	0	0	0	7.14286	7.14286	0	150	21.4286	1014.51
1	130230421	1	23	2	2329	2	2	1	5.16906	#NULL!	1	250	0	21.4286	7.14286	0	0	0	0	0	276.336
1	130230431	1	23	2	2330	1	2	1	4.564	1	1	350	0	0	1.66667	0	0	0	0	0	351.65
1	130230431	1	23	2	2330	2	2	1	4.564	1	1	550	0	3.33333	0	0	117.857	0	0	16.6667	671.69
1	130230441	1	23	2	2331	1	2	0	4.93087	1	1	950	0	10	0	0	10	0	0	117.857	1065.48
1	130230441	1	23	2	2331	2	2	0	4.93087	1	1	1100	0	23.3333	3.33333	0	35.7143	0	3.33333	196.429	1321.69
1	130230451	1	23	2	2332	1	2	1	4.83504	#NULL!	1	750	0	0	0	7.14286	0	0	150	0	890.414
1	130230451	1	23	2	2332	2	2	1	4.83504	#NULL!	1	950	1.66667	1.66667	1.66667	10	1.66667	1.66667	150	1.66667	1102.07
1	110240021	1	24	1	2437	1	2	0	3.73717	0	1	150	0	35.7143	35.7143	0	450	0	39.2857	275	880.786
1	110240021	1	24	1	2437	2	2	0	3.73717	0	1	250	0	0	21.4286	0	275	0	0	275	743.664
1	110240031	1	24	1	2438	1	2	0	3.69062	1	1	35.7143	0	550	0	1.66667	107.143	0	0	350	916.795
1	110240031	1	24	1	2438	2	2	0	3.69062	1	1	7.14286	0	150	0	0	107.143	0	10	150	370.49
1	110240041	1	24	1	2439	1	2	0	3.6386	0	1	117.857	0	10	0	1.66667	10	0	50	250	388.92
1	110240041	1	24	1	2439	2	2	0	3.6386	0	1	150	0	5	0	0	0	0	150	150	412.795
1	110240061	1	24	1	2440	1	2	0	3.83847	0	1	550	1.66667	8.33333	1.66667	1.66667	107.143	1.66667	250	107.143	971.301
1	110240061	1	24	1	2440	2	2	0	3.83847	0	1	450	0	10	0	0	107.143	0	450	196.429	1119.29
1	110240151	1	24	2	2426	1	2	0	3.86311	0	1	550	10	10	1.66667	10	21.4286	1.66667	350	10	921.171
1	110240151	1	24	2	2426	2	2	0	3.86311	0	1	1100	10	5	1.66667	10	10	1.66667	350	10	1456.51
1	110240181	1	24	2	2427	1	2	1	3.90691	#NULL!	1	275	0	107.143	0	1.66667	250	10	10	450	985.535
1	110240181	1	24	2	2427	2	2	1	3.90691	#NULL!	1	450	0	250	0	0	150	0	64.2857	117.857	963.307
1	110240191	1	24	2	2428	1	2	1	3.92334	0	1	192.857	1.66667	10	450	1.66667	450	1.66667	1.66667	1.66667	1055.31
1	110240191	1	24	2	2428	2	2	1	3.92334	0	1	0	1.66667	23.3333	650	1.66667	353.571	1.66667	1.66667	1.66667	986.614
1	110240201	1	24	2	2429	1	2	1	3.89049	0	1	107.143	1.66667	64.2857	1.66667	1.66667	353.571	1.66667	107.143	107.143	670.353
1	110240201	1	24	2	2429	2	2	1	3.89049	0	1	350	0	107.143	0	10	50	0	35.7143	23.3333	550.91
1	110240241	1	24	3	2422	1	2	0	4.17248	1	1	64.2857	275	350	5	10	107.143	16.6667	350	35.7143	1119.78
1	110240241	1	24	3	2422	2	2	0	4.17248	1	1	450	0	250	0	35.7143	350	0	350	35.7143	1360.29
1	110240251	1	24	3	2423	1	2	1	4.11773	0	1	550	0	35.7143	21.4286	150	64.2857	0	550	21.4286	1302.58
1	110240251	1	24	3	2423	2	2	1	4.11773	0	1	650	0	0	10	250	107.143	0	450	35.7143	1408.13
1	110240261	1	24	3	2424	1	2	1	4.35318	1	1	450	10	350	7.14286	0	107.143	0	107.143	107.143	1061.57
1	110240261	1	24	3	2424	2	2	1	4.35318	1	1	750	16.6667	150	0	0	0	0	0	50	942.9
1	110240291	1	24	4	2414	1	2	1	4.36961	0	1	550	0	0	0	16.6667	107.143	0	107.143	250	962.876
1	110240291	1	24	4	2414	2	2	1	4.36961	0	1	750	0	0	0	0	64.2857	0	350	64.2857	1173.34
1	110240301	1	24	4	2415	1	2	0	4.21903	0	1	196.429	3.33333	0	0	0	350	0	350	196.429	986.801
1	110240301	1	24	4	2415	2	2	0	4.21903	0	1	7.14286	10	0	0	0	450	0	450	64.2857	873.161
1	110240311	1	24	4	2416	1	2	1	4.36413	1	1	64.2857	0	350	10	0	117.857	0	50	117.857	636.014
1	110240311	1	24	4	2416	2	2	1	4.36413	1	1	107.143	1.66667	250	3.33333	1.66667	196.429	1.66667	64.2857	196.429	734.717
1	110240341	1	24	5	2408	1	2	0	4.4627	1	1	750	21.4286	35.7143	107.143	0	250	0	64.2857	107.143	1278.27
1	110240341	1	24	5	2408	2	2	0	4.4627	1	1	450	64.2857	10	0	0	150	0	117.857	150	886.276
1	110240361	1	24	5	2409	1	2	1	5.28953	1	1	350	0	107.143	0	0	150	0	450	150	1106.32
1	110240361	1	24	5	2409	2	2	1	5.28953	1	1	117.857	0	21.4286	0	5	64.2857	0	150	21.4286	350.599
1	110240381	1	24	5	2410	1	2	1	4.60507	1	1	3.33333	64.2857	650	0	3.33333	650	0	7.14286	150	1363.94
1	110240381	1	24	5	2410	2	2	1	4.60507	1	1	7.14286	107.143	650	0	35.7143	21.4286	0	1.66667	150	874.861
1	110240391	1	24	5	2411	1	2	0	5.31143	0	1	0	16.6667	150	150	0	510.714	0	350	107.143	1156.15
1	110240391	1	24	5	2411	2	2	0	5.31143	0	1	150	0	117.857	0	10	196.429	0	196.429	250	822.222
1	110240401	1	24	5	2412	1	2	0	4.48734	0	1	250	0	35.7143	5	10	10	0	39.2857	0	339.919
1	110240401	1	24	5	2412	2	2	0	4.48734	0	1	450	0	21.4286	0	10	64.2857	0	150	0	669.419
1	110240421	1	24	5	2413	1	2	0	4.77207	0	1	450	0	0	0	0	353.571	0	250	0	988.179
1	110240421	1	24	5	2413	2	2	0	4.77207	0	1	350	10	16.6667	0	16.6667	35.7143	0	250	16.6667	658.792
1	110240511	1	24	6	2403	1	2	1	5.09788	0	1	450	0	150	0	0	150	0	196.429	250	1100.96
1	110240511	1	24	6	2403	2	2	1	5.09788	0	1	850	0	150	0	0	250	0	10	150	1340.49
1	110240531	1	24	6	2404	1	2	0	4.92539	0	1	250	0	350	0	0	650	0	35.7143	350	1464.88
1	110240531	1	24	6	2404	2	2	0	4.92539	0	1	550	0	0	0	0	550	0	350	50	1393.8
1	110240541	1	24	6	2405	1	2	1	5.25941	0	1	450	0	350	0	0	0	0	950	0	1613.95
1	110240541	1	24	6	2405	2	2	1	5.25941	0	1	432.143	0	0	64.2857	0	107.143	0	450	0	993.443
1	110240561	1	24	6	2406	1	2	1	5.36071	0	1	150	21.4286	64.2857	5	0	107.143	0	7.14286	64.2857	389.121
1	110240561	1	24	6	2406	2	2	1	5.36071	0	1	196.429	21.4286	64.2857	0	0	64.2857	8.33333	117.857	10	453.737
1	110240571	1	24	6	2407	1	2	1	4.84873	0	1	650	1.66667	10	5	10	64.2857	1.66667	50	1.66667	779.189
1	110240571	1	24	6	2407	2	2	1	4.84873	0	1	750	10	192.857	192.857	8.33333	64.2857	1.66667	64.2857	1.66667	1249.18
1	110240681	1	24	7	2402	1	2	0	3.88227	0	1	350	1.66667	64.2857	5	1.66667	107.143	1.66667	1.66667	64.2857	567.407
1	110240681	1	24	7	2402	2	2	0	3.88227	0	1	350	0	35.7143	0	5	16.6667	0	0	0	401.36
1	110240771	1	24	8	2401	1	2	1	4.55852	#NULL!	1	117.857	0	0	0	0	64.2857	0	250	64.2857	451.8
1	110240771	1	24	8	2401	2	2	1	4.55852	#NULL!	1	350	0	64.2857	0	0	64.2857	0	250	64.2857	741.736
1	110240801	1	24	9	2396	1	2	0	5.08693	1	1	450	1.66667	3.33333	1.66667	1.66667	21.4286	1.66667	450	64.2857	933.835
1	110240801	1	24	9	2396	2	2	0	5.08693	1	1	450	1.66667	7.14286	1.66667	1.66667	64.2857	1.66667	250	21.4286	761.117
1	110240831	1	24	9	2397	1	2	1	4.74743	0	1	250	0	0	0	0	0	0	350	196.429	725.543
1	110240831	1	24	9	2397	2	2	1	4.74743	0	1	250	0	0	0	0	0	0	350	64.2857	616.129
1	110240841	1	24	9	2398	1	2	1	4.67625	#NULL!	1	450	0	250	0	7.14286	64.2857	0	3.33333	250	948.259
1	110240841	1	24	9	2398	2	2	1	4.67625	#NULL!	1	250	0	196.429	0	21.4286	64.2857	0	64.2857	150	684.418
1	110240851	1	24	9	2399	1	2	1	4.83778	0	1	650	0	3.33333	0	0	107.143	0	0	64.2857	801.582
1	110240851	1	24	9	2399	2	2	1	4.83778	0	1	850	0	3.33333	0	0	64.2857	0	0	64.2857	963.44
1	110240861	1	24	9	2400	1	2	0	5.02122	0	1	0	1.66667	0	0	1.66667	107.143	1.66667	1.66667	64.2857	154.664
1	110240861	1	24	9	2400	2	2	0	5.02122	0	1	450	0	35.7143	0	5	16.6667	0	0	0	501.36
1	130250051	1	25	1	2541	1	2	1	3.94798	0	1	450	0	0	0	1.66667	35.7143	0	150	1.66667	618.739
1	130250051	1	25	1	2541	2	2	1	3.94798	0	1	350	1.66667	1.66667	1.66667	1.66667	1.66667	1.66667	39.2857	1.66667	395.721
1	130250061	1	25	1	2542	1	2	0	4.16427	#NULL!	1	196.429	0	16.6667	0	0	550	0	0	3.33333	703.672
1	130250061	1	25	1	2542	2	2	0	4.16427	#NULL!	1	353.571	1.66667	21.4286	1.66667	1.66667	450	1.66667	1.66667	1.66667	782.444
1	130250071	1	25	1	2543	1	2	1	4.27105	0	1	107.143	0	35.7143	0	0	117.857	0	64.2857	35.7143	331.186
1	130250071	1	25	1	2543	2	2	1	4.27105	0	1	250	0	0	0	0	0	0	150	64.2857	437.329
1	130250091	1	25	1	2544	1	2	0	3.70431	#NULL!	1	850	1.66667	1.66667	1.66667	5	150	1.66667	1.66667	350	1285.47
1	130250091	1	25	1	2544	2	2	0	3.70431	#NULL!	1	550	0	150	0	10	107.143	0	0	250	996.047
1	130250111	1	25	1	2545	1	2	1	3.62218	0	1	1100	8.33333	8.33333	8.33333	16.6667	8.33333	0	250	35.7143	1399.29
1	130250111	1	25	1	2545	2	2	1	3.62218	0	1	0	0	0	0	0	0	0	0	0	0
1	130250121	1	25	1	2546	1	2	0	3.62218	0	1	1100	8.33333	8.33333	8.33333	16.6667	8.33333	0	250	35.7143	1399.29
1	130250121	1	25	1	2546	2	2	0	3.62218	0	1	0	0	0	0	0	0	0	0	0	0
1	130250131	1	25	1	2547	1	2	0	3.93429	#NULL!	1	550	1.66667	1.66667	1.66667	1.66667	150	1.66667	350	35.7143	1033.71
1	130250131	1	25	1	2547	2	2	0	3.93429	#NULL!	1	250	0	0	0	1.66667	150	0	150	117.857	616.659
1	130250251	1	25	2	2488	1	2	1	4.59959	0	1	650	0	21.4286	0	3.33333	107.143	0	150	107.143	990.382
1	130250251	1	25	2	2488	2	2	1	4.59959	0	1	250	0	21.4286	0	0	0	0	150	64.2857	456.593
1	130250261	1	25	2	2489	1	2	1	4.63792	0	1	550	1.66667	16.6667	1.66667	3.33333	107.143	1.66667	196.429	16.6667	857.459
1	130250261	1	25	2	2489	2	2	1	4.63792	0	1	550	10	107.143	1.66667	10	150	5	107.143	5	904.577
1	130250271	1	25	2	2490	1	2	0	4.65161	0	1	450	10	10	0	21.4286	10	0	350	21.4286	827.466
1	130250271	1	25	2	2490	2	2	0	4.65161	0	1	750	1.66667	10	0	10	16.6667	0	450	10	1194.91
1	130250281	1	25	2	2491	1	2	1	5.21013	0	1	950	0	7.14286	7.14286	5	7.14286	0	0	3.33333	977.03
1	130250281	1	25	2	2491	2	2	1	5.21013	0	1	450	1.66667	35.7143	35.7143	10	35.7143	1.66667	64.2857	64.2857	671.905
1	130250291	1	25	2	2492	1	2	0	5.26489	0	1	550	1.66667	3.33333	3.33333	21.4286	3.33333	0	150	21.4286	731.714
1	130250291	1	25	2	2492	2	2	0	5.26489	0	1	450	0	21.4286	1.66667	64.2857	21.4286	16.6667	150	1.66667	696.794
1	130250301	1	25	2	2493	1	2	0	4.41889	0	1	650	0	35.7143	0	10	35.7143	0	450	30	1149.87
1	130250301	1	25	2	2493	2	2	0	4.41889	0	1	250	0	107.143	10	0	10	0	150	350	789.021
1	130250311	1	25	2	2494	1	2	1	5.1937	0	1	350	0	450	0	0	150	0	150	21.4286	1039.89
1	130250311	1	25	2	2494	2	2	1	5.1937	0	1	250	0	250	0	0	196.429	0	50	107.143	782.986
1	130250321	1	25	2	2495	1	2	1	5.11704	0	1	550	0	21.4286	0	10	10	0	350	35.7143	929.476
1	130250321	1	25	2	2495	2	2	1	5.11704	0	1	550	0	10	0	10	10	0	350	35.7143	919.201
1	130250331	1	25	2	2496	1	2	0	5.04038	0	1	850	5	16.6667	35.7143	107.143	16.6667	1.66667	150	1.66667	1151.81
1	130250331	1	25	2	2496	2	2	0	5.04038	0	1	1100	1.66667	16.6667	8.33333	107.143	16.6667	1.66667	196.429	8.33333	1418.4
1	130250341	1	25	2	2497	1	2	1	4.47091	0	1	550	0	35.7143	0	16.6667	35.7143	0	250	35.7143	881.698
1	130250341	1	25	2	2497	2	2	1	4.47091	0	1	550	0	7.14286	0	7.14286	7.14286	0	350	21.4286	899.736
1	130250351	1	25	2	2498	1	2	0	5.09788	1	1	950	0	35.7143	35.7143	107.143	107.143	0	350	64.2857	1573.66
1	130250351	1	25	2	2498	2	2	0	5.09788	1	1	950	0	150	150	350	350	0	450	150	2380.75
1	130250371	1	25	2	2499	1	2	1	5.10335	1	1	350	0	250	0	64.2857	0	7.14286	150	0	771.893
1	130250371	1	25	2	2499	2	2	1	5.10335	1	1	550	16.6667	50	11.6667	35.7143	35.7143	5	250	5	918.497
1	130250391	1	25	2	2500	1	2	0	5.15811	0	1	650	0	21.4286	0	21.4286	21.4286	0	250	16.6667	944.579
1	130250391	1	25	2	2500	2	2	0	5.15811	0	1	750	0	1.66667	1.66667	35.7143	16.6667	0	350	10	1120.73
1	130250401	1	25	2	2501	1	2	0	5.05681	0	1	850	1.66667	64.2857	0	250	3.33333	1.66667	250	35.7143	1387.95
1	130250401	1	25	2	2501	2	2	0	5.05681	0	1	750	0	35.7143	0	117.857	0	0	150	10	1028.67
1	130250411	1	25	2	2502	1	2	0	4.87337	0	1	650	0	0	0	0	0	0	150	0	784.1
1	130250411	1	25	2	2502	2	2	0	4.87337	0	1	450	0	21.4286	21.4286	21.4286	21.4286	0	150	0	662.593
1	130250421	1	25	2	2503	1	2	1	4.46817	0	1	650	0	16.6667	0	0	35.7143	0	250	0	920.269
1	130250421	1	25	2	2503	2	2	1	4.46817	0	1	350	0	10	0	1.66667	21.4286	0	350	10	700.715
1	130250431	1	25	2	2504	1	2	0	4.55852	1	1	550	5	10	0	5	16.6667	0	250	10	815.018
1	130250431	1	25	2	2504	2	2	0	4.55852	1	1	750	1.66667	10	1.66667	5	21.4286	1.66667	150	10	929.626
1	130250441	1	25	2	2505	1	2	1	4.42437	0	1	750	0	64.2857	0	0	21.4286	0	150	64.2857	1014.19
1	130250441	1	25	2	2505	2	2	1	4.42437	0	1	550	0	3.33333	1.66667	1.66667	21.4286	0	150	64.2857	762.52
1	130250451	1	25	2	2506	1	2	1	4.88706	0	1	1100	0	0	0	0	0	0	107.143	0	1195.79
1	130250451	1	25	2	2506	2	2	1	4.88706	0	1	250	0	0	0	0	3.33333	0	0	107.143	341.681
1	130250461	1	25	2	2507	1	2	1	4.58316	0	1	550	0	35.7143	0	16.6667	35.7143	0	250	0	852.126
1	130250461	1	25	2	2507	2	2	1	4.58316	0	1	450	0	10	0	10	64.2857	0	21.4286	10	552.481
1	130250471	1	25	2	2508	1	2	0	4.90623	1	1	235.714	0	150	0	0	278.571	0	0	350	908.293
1	130250471	1	25	2	2508	2	2	0	4.90623	1	1	0	0	92.8571	0	35.7143	35.7143	0	16.6667	0	161.736
1	110260031	1	26	1	2623	1	2	1	3.64134	#NULL!	1	150	0	0	0	0	275	0	450	107.143	885.764
1	110260031	1	26	1	2623	2	2	1	3.64134	#NULL!	1	550	10	10	0	10	275	0	117.857	107.143	1016.65
1	110260051	1	26	1	2624	1	2	1	3.7974	1	1	450	0	10	0	1.66667	117.857	0	0	35.7143	594.928
1	110260051	1	26	1	2624	2	2	1	3.7974	1	1	250	0	117.857	0	3.33333	64.2857	0	0	64.2857	469.343
1	110260061	1	26	1	2625	1	2	1	4.0794	1	1	117.857	0	350	0	0	7.14286	0	117.857	21.4286	561.971
1	110260061	1	26	1	2625	2	2	1	4.0794	1	1	150	0	0	0	0	117.857	0	64.2857	21.4286	330.107
1	110260121	1	26	1	2626	1	2	1	3.60301	0	1	350	16.6667	350	0	0	650	0	650	250	2047.9
1	110260121	1	26	1	2626	2	2	1	3.60301	0	1	450	10	1.66667	1.66667	35.7143	450	5	550	150	1515.46
1	110260261	1	26	2	2581	1	2	0	4.36961	0	1	550	0	21.4286	21.4286	5	250	0	8.33333	250	1031.85
1	110260261	1	26	2	2581	2	2	0	4.36961	0	1	550	0	35.7143	8.33333	0	107.143	0	350	0	998.614
1	110260281	1	26	2	2582	1	2	0	4.44079	1	1	550	107.143	1.66667	1.66667	0	1.66667	1.66667	50	1.66667	709.197
1	110260281	1	26	2	2582	2	2	0	4.44079	1	1	350	21.4286	10	10	10	5	0	117.857	0	508.951
1	110260311	1	26	2	2583	1	2	0	4.82409	#NULL!	1	450	0	7.14286	0	0	150	0	250	0	813.421
1	110260311	1	26	2	2583	2	2	0	4.82409	#NULL!	1	192.857	0	0	0	0	117.857	0	250	0	521.25
1	110260331	1	26	2	2584	1	2	1	4.83504	1	1	450	0	1.66667	1.66667	23.3333	35.7143	0	350	5	822.601
1	110260331	1	26	2	2584	2	2	1	4.83504	1	1	450	0	1.66667	1.66667	0	350	10	350	64.2857	1139.48
1	110260361	1	26	2	2585	1	2	0	4.72005	0	1	250	0	250	0	0	550	0	0	350	1254.05
1	110260361	1	26	2	2585	2	2	0	4.72005	0	1	196.429	0	196.429	35.7143	0	350	0	0	350	1009.67
1	110260371	1	26	2	2586	1	2	0	4.48734	#NULL!	1	250	0	0	0	0	50	0	0	0	294.5
1	110260371	1	26	2	2586	2	2	0	4.48734	#NULL!	1	550	0	0	0	3.33333	150	0	150	0	820.547
1	110260521	1	26	3	2571	1	2	0	3.86858	0	1	30	1.66667	1.66667	1.66667	1.66667	850	1.66667	150	850	1632.14
1	110260521	1	26	3	2571	2	2	0	3.86858	0	1	11.6667	0	150	0	16.6667	650	0	350	350	1342.45
1	110260541	1	26	3	2572	1	2	0	5.24025	0	1	350	1.66667	450	0	1.66667	350	0	550	64.2857	1614.12
1	110260541	1	26	3	2572	2	2	0	5.24025	0	1	50	0	0	0	10	117.857	0	350	117.857	574.219
1	110260561	1	26	3	2573	1	2	1	3.63587	1	1	350	0	150	0	7.14286	192.857	0	0	250	869.807
1	110260561	1	26	3	2573	2	2	1	3.63587	1	1	550	1.66667	107.143	1.66667	1.66667	1.66667	1.66667	7.14286	350	950.229
1	110260581	1	26	3	2574	1	2	0	5.2731	0	1	250	0	150	0	10	21.4286	10	50	107.143	554.876
1	110260581	1	26	3	2574	2	2	0	5.2731	0	1	196.429	0	196.429	0	5	150	0	50	35.7143	585.209
1	120270021	1	27	1	2756	1	1	1	3.78371	1	4	250	0	150	0	0	107.143	0	150	64.2857	667.536
1	120270021	1	27	1	2756	2	1	1	3.78371	1	4	275	0	275	0	0	0	0	250	10	754.005
1	120270041	1	27	1	2757	1	1	1	3.84942	0	2	250	0	50	0	0	107.143	0	650	35.7143	1000.98
1	120270041	1	27	1	2757	2	1	1	3.84942	0	2	350	0	35.7143	1.66667	0	0	0	0	0	383.757
1	120270051	1	27	1	2758	1	1	1	4.17522	0	2	1100	0	0	0	0	550	0	275	35.7143	1864.92
1	120270051	1	27	1	2758	2	1	1	4.17522	0	2	650	0	0	0	0	275	0	35.7143	10	934.959
1	120270061	1	27	1	2759	1	1	0	4.23546	0	2	450	0	21.4286	0	0	10	0	250	16.6667	715.464
1	120270061	1	27	1	2759	2	1	0	4.23546	0	2	350	1.66667	7.14286	1.66667	1.66667	0	1.66667	117.857	3.33333	470.784
1	120270071	1	27	1	2760	1	1	0	4.16153	#NULL!	2	275	0	107.143	64.2857	3.33333	21.4286	0	250	0	680.482
1	120270071	1	27	1	2760	2	1	0	4.16153	#NULL!	2	550	0	192.857	192.857	0	107.143	0	350	0	1322.56
1	120270081	1	27	1	2761	1	1	0	4.23819	0	2	250	0	0	0	0	21.4286	0	3.33333	64.2857	325.28
1	120270081	1	27	1	2761	2	1	0	4.23819	0	2	250	1.66667	1.66667	1.66667	1.66667	1.66667	1.66667	21.4286	10	286.657
1	120270131	1	27	2	2729	1	1	0	3.52088	1	4	450	1.66667	21.4286	21.4286	1.66667	16.6667	0	250	35.7143	761.522
1	120270131	1	27	2	2729	2	1	0	3.52088	1	4	350	1.66667	10	10	1.66667	10	1.66667	250	21.4286	623.621
1	120270141	1	27	2	2730	1	1	1	3.50171	#NULL!	4	117.857	1.66667	64.2857	64.2857	5	350	5	1.66667	450	935.318
1	120270141	1	27	2	2730	2	1	1	3.50171	#NULL!	4	117.857	3.33333	64.2857	64.2857	35.7143	64.2857	0	21.4286	150	474.766
1	120270191	1	27	3	2712	1	1	1	4.96372	1	4	450	1.66667	21.4286	21.4286	1.66667	10	1.66667	350	107.143	905.581
1	120270191	1	27	3	2712	2	1	1	4.96372	1	4	350	1.66667	10	10	1.66667	10	1.66667	250	21.4286	623.621
1	120270201	1	27	3	2713	1	1	1	5.02943	0	2	350	0	3.33333	0	0	150	0	150	16.6667	634.397
1	120270201	1	27	3	2713	2	1	1	5.02943	0	2	450	0	3.33333	0	0	64.2857	0	250	10	741.991
1	120270211	1	27	3	2714	1	1	0	5.13895	0	2	275	0	150	21.4286	5	117.857	0	64.2857	10	606.129
1	120270211	1	27	3	2714	2	1	0	5.13895	0	2	350	0	150	150	5	196.429	0	64.2857	10	878.343
1	120270231	1	27	3	2715	1	1	1	4.93908	0	2	350	0	350	10	0	250	0	107.143	0	992.836
1	120270231	1	27	3	2715	2	1	1	4.93908	0	2	350	1.66667	35.7143	107.143	1.66667	250	1.66667	107.143	1.66667	812.433
1	120270241	1	27	3	2716	1	1	1	5.19644	0	2	550	0	21.4286	0	0	0	0	0	0	569.264
1	120270241	1	27	3	2716	2	1	1	5.19644	0	2	650	0	35.7143	35.7143	21.4286	64.2857	0	150	64.2857	980.95
1	120270251	1	27	4	2697	1	1	0	4.64066	0	4	450	50	0	0	21.4286	250	0	250	35.7143	994.464
1	120270251	1	27	4	2697	2	1	0	4.64066	0	4	850	21.4286	50	0	7.14286	107.143	0	0	64.2857	1071.26
1	120270261	1	27	4	2698	1	1	0	4.52567	0	2	0	0	64.2857	0	0	10	0	450	0	468.993
1	120270261	1	27	4	2698	2	1	0	4.52567	0	2	750	0	7.14286	0	0	0	0	350	0	1069.32
1	120270271	1	27	4	2699	1	1	0	4.82409	0	2	350	0	10	0	0	196.429	0	150	3.33333	670.671
1	120270271	1	27	4	2699	2	1	0	4.82409	0	2	650	0	16.6667	1.66667	0	192.857	0	350	150	1275.38
1	120270281	1	27	4	2700	1	1	1	4.69268	0	4	107.143	0	16.6667	0	0	250	0	150	150	602.926
1	120270281	1	27	4	2700	2	1	1	4.69268	0	4	150	0	0	0	0	117.857	0	0	50	296.293
1	120270301	1	27	4	2701	1	1	0	4.54209	0	2	550	1.66667	5	5	10	10	1.66667	196.429	1.66667	757.287
1	120270301	1	27	4	2701	2	1	0	4.54209	0	2	550	0	8.33333	0	5	64.2857	0	16.6667	0	634.026
1	120270311	1	27	4	2702	1	1	1	4.71732	0	2	550	0	0	0	1.66667	64.2857	0	350	3.33333	924.348
1	120270311	1	27	4	2702	2	1	1	4.71732	0	2	450	0	0	0	16.6667	64.2857	0	150	10	664.328
1	120270321	1	27	4	2703	1	1	1	4.75565	1	2	550	0	35.7143	1.66667	16.6667	16.6667	0	1.66667	1.66667	616.194
1	120270321	1	27	4	2703	2	1	1	4.75565	1	2	650	1.66667	10	1.66667	1.66667	3.33333	0	0	1.66667	668.125
1	120270331	1	27	4	2704	1	1	1	4.40794	1	2	250	0	64.2857	0	10	16.6667	0	107.143	16.6667	441.052
1	120270331	1	27	4	2704	2	1	1	4.40794	1	2	450	1.66667	50	1.66667	1.66667	10	1.66667	150	1.66667	645.568
1	120270351	1	27	4	2705	1	1	0	4.30664	#NULL!	2	950	1.66667	5	1.66667	5	5	1.66667	150	5	1106.37
1	120270351	1	27	4	2705	2	1	0	4.30664	#NULL!	2	0	0	0	0	0	0	0	0	0	0
1	120270361	1	27	5	2686	1	1	0	3.90965	#NULL!	2	550	0	35.7143	0	21.4286	0	0	550	0	1092.75
1	120270361	1	27	5	2686	2	1	0	3.90965	#NULL!	2	550	0	0	0	0	0	0	0	0	550
1	120270371	1	27	5	2687	1	1	1	3.98905	0	4	350	0	0	0	0	117.857	0	0	21.4286	472.636
1	120270371	1	27	5	2687	2	1	1	3.98905	0	4	850	0	0	0	0	117.857	0	0	21.4286	972.636
1	120270381	1	27	5	2688	1	1	0	3.95072	1	4	450	0	0	0	0	196.429	0	350	10	946.001
1	120270381	1	27	5	2688	2	1	0	3.95072	1	4	750	1.66667	1.66667	1.66667	1.66667	35.7143	1.66667	350	10	1110.7
1	120270391	1	27	5	2689	1	1	0	3.54552	0	2	150	0	650	5	5	64.2857	0	64.2857	64.2857	911.634
1	120270391	1	27	5	2689	2	1	0	3.54552	0	2	350	0	64.2857	5	64.2857	117.857	0	64.2857	21.4286	649.679
1	120270401	1	27	5	2690	1	1	1	4.11225	0	4	350	0	21.4286	0	0	350	0	350	250	1200.66
1	120270401	1	27	5	2690	2	1	1	4.11225	0	4	64.2857	0	39.2857	0	0	250	0	550	107.143	902.518
1	120270411	1	27	5	2691	1	1	1	3.88775	#NULL!	4	550	0	0	0	16.6667	16.6667	1.66667	250	16.6667	818.317
1	120270411	1	27	5	2691	2	1	1	3.88775	#NULL!	4	650	0	0	0	10	21.4286	0	350	0	990.811
1	120270421	1	27	5	2692	1	1	0	4.14237	#NULL!	4	450	1.66667	7.14286	1.66667	1.66667	1.66667	1.66667	250	3.33333	690.403
1	120270421	1	27	5	2692	2	1	0	4.14237	#NULL!	4	550	0	21.4286	0	0	10	0	150	3.33333	715.024
1	120270431	1	27	5	2693	1	1	0	4.11773	#NULL!	2	550	1.66667	1.66667	1.66667	64.2857	10	1.66667	250	5	849.632
1	120270431	1	27	5	2693	2	1	0	4.11773	#NULL!	2	650	0	0	0	21.4286	10	0	150	0	811.943
1	120270441	1	27	5	2694	1	1	1	3.92882	#NULL!	2	1.66667	64.2857	1.66667	1.66667	1.66667	950	1.66667	150	350	1341.36
1	120270441	1	27	5	2694	2	1	1	3.92882	#NULL!	2	550	1.66667	1.66667	1.66667	1.66667	275	1.66667	1.66667	350	1093.78
1	120270451	1	27	5	2695	1	1	0	4.1232	0	4	150	0	7.14286	0	0	0	0	350	35.7143	498.893
1	120270451	1	27	5	2695	2	1	0	4.1232	0	4	350	0	21.4286	0	0	21.4286	0	550	35.7143	909.607
1	120270471	1	27	5	2696	1	1	0	3.7974	1	2	150	0	350	0	3.33333	64.2857	0	50	150	693.711
1	120270471	1	27	5	2696	2	1	0	3.7974	1	2	550	0	0	0	0	150	0	450	21.4286	1103.54
1	120270611	1	27	6	2678	1	1	0	4.57769	#NULL!	2	750	1.66667	10	1.66667	1.66667	35.7143	1.66667	350	107.143	1198.63
1	120270611	1	27	6	2678	2	1	0	4.57769	#NULL!	2	750	0	64.2857	0	0	35.7143	0	450	35.7143	1271.45
1	120270631	1	27	6	2679	1	1	0	4.3039	0	2	250	0	21.4286	21.4286	0	107.143	0	150	1.66667	521.316
1	120270631	1	27	6	2679	2	1	0	4.3039	0	2	550	0	3.33333	107.143	3.33333	107.143	0	150	10	899.752
1	120270651	1	27	6	2680	1	1	0	4.5859	0	2	350	0	0	0	0	0	0	350	0	662.9
1	120270651	1	27	6	2680	2	1	0	4.5859	0	2	850	0	0	0	0	0	0	450	0	1252.3
1	120270671	1	27	6	2681	1	1	1	4.64066	0	2	550	0	8.33333	0	1.66667	21.4286	21.4286	150	50	772.179
1	120270671	1	27	6	2681	2	1	1	4.64066	0	2	250	1.66667	10	10	1.66667	16.6667	1.66667	250	1.66667	513.192
1	120270681	1	27	6	2682	1	1	1	4.76934	0	2	850	0	35.7143	0	16.6667	16.6667	0	150	21.4286	1063.52
1	120270681	1	27	6	2682	2	1	1	4.76934	0	2	950	1.66667	64.2857	1.66667	5	64.2857	1.66667	64.2857	10	1139.94
1	120270701	1	27	6	2683	1	1	0	5.01574	#NULL!	2	550	0	21.4286	0	0	10	0	350	3.33333	893.824
1	120270701	1	27	6	2683	2	1	0	5.01574	#NULL!	2	550	0	35.7143	35.7143	0	0	0	350	3.33333	933.124
1	120270711	1	27	6	2684	1	1	1	4.37235	0	2	450	0	0	0	21.4286	10	0	350	7.14286	796.657
1	120270711	1	27	6	2684	2	1	1	4.37235	0	2	250	0	1.66667	0	10	10	0	250	3.33333	495.498
1	120270731	1	27	6	2685	1	1	0	4.54209	0	4	750	0	150	0	21.4286	107.143	0	150	21.4286	1150.99
1	120270731	1	27	6	2685	2	1	0	4.54209	0	4	750	0	10	21.4286	1.66667	35.7143	0	150	0	947.563
1	120270851	1	27	7	2677	1	1	1	5.26489	0	2	350	0	3.33333	0	10	117.857	0	0	21.4286	484.472
1	120270851	1	27	7	2677	2	1	1	5.26489	0	2	850	0	0	0	0	117.857	0	0	64.2857	1008.12
1	120270951	1	27	8	2675	1	1	0	4.21629	1	4	350	0	5	0	0	64.2857	0	150	0	545.809
1	120270951	1	27	8	2675	2	1	0	4.21629	1	4	350	0	0	0	0	117.857	0	150	21.4286	606.736
1	120270961	1	27	8	2676	1	1	1	4.22177	0	2	550	0	35.7143	10	10	150	0	250	64.2857	1011.08
1	120270961	1	27	8	2676	2	1	1	4.22177	0	2	550	0	16.6667	35.7143	10	64.2857	0	150	64.2857	853.723
1	120271011	1	27	9	2671	1	1	1	4.14784	1	4	950	0	0	0	0	0	0	550	0	1441.7
1	120271011	1	27	9	2671	2	1	1	4.14784	1	4	850	0	0	0	0	0	0	353.571	107.143	1254.81
1	120271051	1	27	9	2672	1	1	0	3.60301	0	2	550	0	21.4286	64.2857	0	0	0	10	64.2857	695.076
1	120271051	1	27	9	2672	2	1	0	3.60301	0	2	1100	0	35.7143	35.7143	0	107.143	0	250	107.143	1575.04
1	120271061	1	27	9	2673	1	1	1	3.89049	0	4	650	1.66667	7.14286	1.66667	10	7.14286	1.66667	850	107.143	1525
1	120271061	1	27	9	2673	2	1	1	3.89049	0	4	850	0	21.4286	0	10	21.4286	0	350	150	1334.28
1	120271101	1	27	9	2674	1	1	0	3.95346	0	2	250	0	50	50	0	150	0	550	64.2857	1022.88
1	120271101	1	27	9	2674	2	1	0	3.95346	0	2	0	0	0	0	0	0	0	0	0	0
1	120271311	1	27	11	2662	1	1	1	4.3258	0	4	117.857	10	21.4286	0	0	117.857	0	21.4286	64.2857	324.39
1	120271311	1	27	11	2662	2	1	1	4.3258	0	4	650	10	21.4286	21.4286	35.7143	35.7143	7.14286	0	5	774.18
1	120271321	1	27	11	2663	1	1	1	4.85421	0	2	650	1.66667	5	1.66667	1.66667	10	1.66667	150	0	803.733
1	120271321	1	27	11	2663	2	1	1	4.85421	0	2	550	0	16.6667	0	0	16.6667	0	150	10	722.197
1	120271351	1	27	11	2664	1	1	1	4.69815	1	4	450	0	64.2857	0	5	64.2857	0	450	1.66667	973.107
1	120271351	1	27	11	2664	2	1	1	4.69815	1	4	750	0	0	0	0	107.143	0	450	0	1247.66
1	120271361	1	27	11	2665	1	1	0	4.40246	0	4	450	0	50	0	0	21.4286	0	250	0	737.521
1	120271361	1	27	11	2665	2	1	0	4.40246	0	4	350	0	150	0	0	21.4286	0	0	150	628.121
1	120271371	1	27	11	2666	1	1	0	4.40246	#NULL!	4	550	0	150	0	0	21.4286	0	250	0	927.421
1	120271371	1	27	11	2666	2	1	0	4.40246	#NULL!	4	350	0	150	0	0	21.4286	0	0	150	628.121
1	120271381	1	27	11	2667	1	1	0	4.81314	0	2	350	0	16.6667	0	10	107.143	0	250	107.143	781.395
1	120271381	1	27	11	2667	2	1	0	4.81314	0	2	450	0	23.3333	1.66667	16.6667	35.7143	0	450	107.143	1010.16
1	120271411	1	27	11	2668	1	1	0	4.93361	1	2	50	0	150	21.4286	10	50	0	21.4286	250	485.561
1	120271411	1	27	11	2668	2	1	0	4.93361	1	2	350	0	35.7143	21.4286	0	250	1.66667	1.66667	250	835.761
1	120271431	1	27	11	2669	1	1	0	4.37235	0	4	350	0	21.4286	10	5	35.7143	8.33333	350	196.429	898.163
1	120271431	1	27	11	2669	2	1	0	4.37235	0	4	250	0	21.4286	10	0	21.4286	0	250	107.143	610.45
1	120271441	1	27	11	2670	1	1	1	4.84326	#NULL!	2	64.2857	10	50	0	0	550	0	64.2857	64.2857	719.426
1	120271441	1	27	11	2670	2	1	1	4.84326	#NULL!	2	550	16.6667	21.4286	1.66667	35.7143	107.143	1.66667	107.143	107.143	900.443
1	130280021	1	28	1	2846	1	2	0	3.6742	1	1	950	0	21.4286	7.14286	35.7143	117.857	0	7.14286	250	1326.19
1	130280021	1	28	1	2846	2	2	0	3.6742	1	1	350	0	64.2857	21.4286	21.4286	196.429	10	21.4286	250	857.629
1	130280031	1	28	1	2847	1	2	0	3.80561	0	1	250	0	0	0	0	35.7143	0	0	0	281.786
1	130280031	1	28	1	2847	2	2	0	3.80561	0	1	850	0	0	0	1.66667	10	0	150	0	994.473
1	130280041	1	28	1	2848	1	2	1	3.54004	0	1	650	0	0	0	0	107.143	0	250	8.33333	975.757
1	130280041	1	28	1	2848	2	2	1	3.54004	0	1	450	0	0	0	0	35.7143	0	350	35.7143	824.257
1	130280051	1	28	1	2849	1	2	0	3.55373	1	1	550	0	150	0	23.3333	150	0	350	35.7143	1181.45
1	130280051	1	28	1	2849	2	2	0	3.55373	1	1	450	0	107.143	5	16.6667	16.6667	0	350	10	902.018
1	130280061	1	28	1	2850	1	2	1	3.80835	0	1	550	0	0	0	1.66667	39.2857	0	21.4286	0	605.595
1	130280061	1	28	1	2850	2	2	1	3.80835	0	1	650	0	21.4286	0	0	150	0	0	64.2857	855.993
1	130280071	1	28	1	2851	1	2	0	3.58385	1	1	450	1.66667	64.2857	1.66667	1.66667	1.66667	0	0	0	514.065
1	130280071	1	28	1	2851	2	2	0	3.58385	1	1	150	0	1.66667	1.66667	0	0	0	0	250	360.148
1	130280081	1	28	1	2852	1	2	0	3.56194	1	1	250	0	1.66667	1.66667	1.66667	35.7143	0	550	107.143	866.822
1	130280081	1	28	1	2852	2	2	0	3.56194	1	1	450	0	64.2857	0	0	10	0	150	10	659.073
1	130280091	1	28	1	2853	1	2	0	3.52361	0	1	550	1.66667	1.66667	1.66667	150	10	1.66667	450	7.14286	1105.98
1	130280091	1	28	1	2853	2	2	0	3.52361	0	1	750	0	0	0	64.2857	1.66667	0	650	0	1389.41
1	130280111	1	28	1	2854	1	2	0	3.84668	0	1	350	0	7.14286	21.4286	1.66667	21.4286	0	450	64.2857	853.709
1	130280111	1	28	1	2854	2	2	0	3.84668	0	1	450	1.66667	10	10	1.66667	35.7143	1.66667	350	35.7143	847.735
1	130280121	1	28	1	2855	1	2	0	3.90691	0	1	350	0	0	0	64.2857	64.2857	0	450	10	874.623
1	130280121	1	28	1	2855	2	2	0	3.90691	0	1	0	0	0	0	0	0	0	0	0	0
1	130280141	1	28	1	2856	1	2	0	3.54004	#NULL!	1	450	0	16.6667	0	0	107.143	0	250	5	787.98
1	130280141	1	28	1	2856	2	2	0	3.54004	#NULL!	1	750	1.66667	3.33333	1.66667	10	21.4286	1.66667	64.2857	117.857	940.73
1	130280261	1	28	2	2810	1	2	0	4.21355	0	1	450	0	0	0	10	107.143	0	350	64.2857	920.326
1	130280261	1	28	2	2810	2	2	0	4.21355	0	1	350	0	0	0	10	64.2857	0	350	0	728.954
1	130280271	1	28	2	2811	1	2	1	4.37235	0	1	250	1.66667	10	1.66667	10	21.4286	0	150	7.14286	430.231
1	130280271	1	28	2	2811	2	2	1	4.37235	0	1	550	1.66667	35.7143	8.33333	8.33333	35.7143	1.66667	250	150	980.325
1	130280281	1	28	2	2812	1	2	1	3.91786	0	1	150	7.14286	0	0	1.66667	150	3.33333	3.33333	107.143	386.703
1	130280281	1	28	2	2812	2	2	1	3.91786	0	1	250	21.4286	0	0	35.7143	117.857	0	0	0	407.871
1	130280291	1	28	2	2813	1	2	0	3.91513	1	1	150	0	21.4286	0	0	150	0	117.857	107.143	496.843
1	130280291	1	28	2	2813	2	2	0	3.91513	1	1	350	0	64.2857	0	0	150	0	150	64.2857	728.621
1	130280301	1	28	2	2814	1	2	1	4.39151	0	1	350	39.2857	21.4286	0	7.14286	0	0	450	350	1106.92
1	130280301	1	28	2	2814	2	2	1	4.39151	0	1	350	3.33333	107.143	1.66667	3.33333	10	10	1.66667	150	597.538
1	130280311	1	28	2	2815	1	2	0	4.04107	1	1	150	0	1.66667	0	1.66667	21.4286	0	250	10	403.823
1	130280311	1	28	2	2815	2	2	0	4.04107	1	1	250	0	5	10	5	10	0	64.2857	64.2857	388.415
1	130280321	1	28	2	2816	1	2	0	4.22177	0	1	350	0	0	0	10	50	0	450	0	805.64
1	130280321	1	28	2	2816	2	2	0	4.22177	0	1	650	0	0	0	10	150	0	350	0	1105.24
1	130280331	1	28	2	2817	1	2	1	4.08487	0	1	250	1.66667	5	1.66667	8.33333	64.2857	1.66667	250	107.143	636.055
1	130280331	1	28	2	2817	2	2	1	4.08487	0	1	35.7143	0	5	1.66667	1.66667	21.4286	0	250	64.2857	339.133
1	130280351	1	28	2	2818	1	2	0	4.08761	1	1	450	0	21.4286	21.4286	0	235.714	0	450	0	1102.56
1	130280351	1	28	2	2818	2	2	0	4.08761	1	1	150	0	50	0	0	64.2857	0	650	10	841.544
1	130280511	1	28	3	2805	1	2	1	4.87337	#NULL!	1	117.857	1.66667	3.33333	1.66667	150	7.14286	1.66667	450	21.4286	684.619
1	130280511	1	28	3	2805	2	2	1	4.87337	#NULL!	1	650	1.66667	1.66667	1.66667	150	64.2857	1.66667	350	21.4286	1176.72
1	130280581	1	28	4	2795	1	2	0	4.61602	0	1	450	1.66667	1.66667	1.66667	107.143	35.7143	1.66667	350	107.143	984.378
1	130280581	1	28	4	2795	2	2	0	4.61602	0	1	550	0	0	0	10	107.143	0	550	64.2857	1199.13
1	130280591	1	28	4	2796	1	2	0	4.79124	#NULL!	1	450	0	16.6667	0	16.6667	107.143	0	250	5	802.714
1	130280591	1	28	4	2796	2	2	0	4.79124	#NULL!	1	750	1.66667	3.33333	1.66667	10	21.4286	1.66667	64.2857	117.857	940.73
1	130280711	1	28	5	2792	1	2	1	4.52293	0	1	350	0	0	0	16.6667	0	0	250	16.6667	602.033
1	130280711	1	28	5	2792	2	2	1	4.52293	0	1	650	0	1.66667	0	10	10	16.6667	250	5	911.378
1	130280721	1	28	5	2793	1	2	0	5.2293	1	1	750	0	150	23.3333	1.66667	10	0	64.2857	64.2857	1029.02
1	130280721	1	28	5	2793	2	2	0	5.2293	1	1	850	1.66667	50	23.3333	35.7143	11.6667	1.66667	150	5	1101.36
1	130280741	1	28	5	2794	1	2	0	4.52567	0	1	850	0	0	0	1.66667	1.66667	0	0	21.4286	870.7
1	130280741	1	28	5	2794	2	2	0	4.52567	0	1	750	0	10	0	0	35.7143	0	64.2857	0	848.247
1	130280811	1	28	6	2787	1	2	1	4.52293	0	1	350	0	0	0	16.6667	0	0	250	16.6667	602.033
1	130280811	1	28	6	2787	2	2	1	4.52293	0	1	650	0	1.66667	0	10	10	16.6667	250	5	911.378
1	130280831	1	28	6	2788	1	2	0	4.57221	0	1	150	1.66667	1.66667	1.66667	1.66667	150	0	250	1.66667	514.667
1	130280831	1	28	6	2788	2	2	0	4.57221	0	1	250	1.66667	5	5	1.66667	64.2857	1.66667	150	1.66667	456.728
1	130280841	1	28	6	2789	1	2	1	4.74743	0	1	350	0	50	0	10	250	0	150	0	760.39
1	130280841	1	28	6	2789	2	2	1	4.74743	0	1	0	0	0	0	0	0	0	0	0	0
1	130280851	1	28	6	2790	1	2	1	4.81862	#NULL!	1	450	64.2857	5	1.66667	1.66667	107.143	10	64.2857	0	683.368
1	130280851	1	28	6	2790	2	2	1	4.81862	#NULL!	1	250	107.143	16.6667	0	16.6667	64.2857	0	10	10	461.187
1	130280861	1	28	6	2791	1	2	0	4.48734	0	1	750	35.7143	0	0	0	16.6667	0	450	0	1202.81
1	130280861	1	28	6	2791	2	2	0	4.48734	0	1	950	16.6667	8.33333	1.66667	10	5	1.66667	450	1.66667	1394.21
1	120290011	1	29	1	2946	1	1	0	4.31211	1	2	350	1.66667	21.4286	1.66667	1.66667	150	1.66667	350	35.7143	851.474
1	120290011	1	29	1	2946	2	1	0	4.31211	1	2	550	1.66667	150	1.66667	1.66667	107.143	1.66667	550	107.143	1366.86
1	120290021	1	29	1	2947	1	1	0	4.03833	1	4	850	0	150	0	35.7143	35.7143	0	192.857	150	1344.82
1	120290021	1	29	1	2947	2	1	0	4.03833	1	4	950	0	64.2857	0	35.7143	196.429	0	250	64.2857	1490.91
1	120290031	1	29	1	2948	1	1	1	3.91513	1	4	550	0	0	0	0	0	0	0	0	550
1	120290031	1	29	1	2948	2	1	1	3.91513	1	4	750	0	0	0	0	0	0	250	35.7143	1003.07
1	120290041	1	29	1	2949	1	1	1	4.02738	1	2	350	0	21.4286	1.66667	21.4286	64.2857	0	0	0	447.071
1	120290041	1	29	1	2949	2	1	1	4.02738	1	2	450	0	35.7143	0	1.66667	150	0	0	1.66667	618.46
1	120290051	1	29	1	2950	1	1	0	3.54278	0	4	350	0	21.4286	21.4286	0	64.2857	0	150	107.143	670.507
1	120290051	1	29	1	2950	2	1	0	3.54278	0	4	250	1.66667	7.14286	7.14286	1.66667	3.33333	1.66667	50	21.4286	333.491
1	120290061	1	29	1	2951	1	1	0	3.69884	0	4	150	0	64.2857	0	1.66667	107.143	0	450	64.2857	760.152
1	120290061	1	29	1	2951	2	1	0	3.69884	0	4	196.429	1.66667	107.143	10	1.66667	107.143	1.66667	350	107.143	804.21
1	120290091	1	29	1	2952	1	1	1	3.63313	0	2	250	0	0	0	0	107.143	0	250	107.143	657.571
1	120290091	1	29	1	2952	2	1	1	3.63313	0	2	350	0	0	0	5	35.7143	0	150	107.143	609.02
1	120290101	1	29	1	2953	1	1	0	3.85216	1	4	450	0	35.7143	0	650	250	0	64.2857	21.4286	1354.42
1	120290101	1	29	1	2953	2	1	0	3.85216	1	4	550	0	150	0	21.4286	250	0	150	150	1184.59
1	120290141	1	29	2	2906	1	1	1	4.92813	1	2	64.2857	0	250	250	0	64.2857	0	250	64.2857	870.479
1	120290141	1	29	2	2906	2	1	1	4.92813	1	2	450	0	35.7143	150	0	64.2857	0	21.4286	64.2857	760.207
1	120290151	1	29	2	2907	1	1	0	5.1718	1	2	450	0	10	10	1.66667	3.33333	0	21.4286	117.857	590.073
1	120290151	1	29	2	2907	2	1	0	5.1718	1	2	350	0	5	64.2857	8.33333	16.6667	0	250	16.6667	677.638
1	120290201	1	29	2	2909	1	1	1	4.50376	0	4	850	23.3333	50	50	0	107.143	0	196.429	35.7143	1268.3
1	120290201	1	29	2	2909	2	1	1	4.50376	0	4	450	35.7143	107.143	35.7143	0	107.143	0	107.143	0	808.5
1	120290211	1	29	2	2910	1	1	1	5.06776	1	2	450	0	21.4286	0	0	64.2857	0	0	196.429	689.121
1	120290211	1	29	2	2910	2	1	1	5.06776	1	2	950	0	21.4286	0	21.4286	117.857	0	117.857	117.857	1296.05
1	120290221	1	29	2	2911	1	1	1	5.23203	#NULL!	4	350	0	35.7143	0	0	7.14286	0	0	21.4286	406.207
1	120290221	1	29	2	2911	2	1	1	5.23203	#NULL!	4	350	0	11.6667	0	0	0	0	0	64.2857	413.717
1	120290231	1	29	2	2912	1	1	0	4.95551	0	4	450	1.66667	16.6667	1.66667	16.6667	35.7143	1.66667	196.429	450	1064.47
1	120290231	1	29	2	2912	2	1	0	4.95551	0	4	0	1.66667	10	1.66667	10	10	1.66667	5	350	325.765
1	120290241	1	29	2	2913	1	1	1	4.73648	0	2	250	1.66667	7.14286	1.66667	1.66667	1.66667	1.66667	0	450	636.743
1	120290241	1	29	2	2913	2	1	1	4.73648	0	2	450	1.66667	35.7143	1.66667	1.66667	1.66667	1.66667	0	350	779.629
1	110300051	1	30	2	3002	1	1	1	4.13415	0	4	350	0	21.4286	0	0	150	0	350	16.6667	829.464
1	110300051	1	30	2	3002	2	1	1	4.13415	0	4	950	1.66667	10	10	1.66667	64.2857	1.66667	0	1.66667	1032.07
1	110300061	1	30	2	3003	1	1	1	4.1013	1	2	850	35.7143	450	196.429	10	192.857	0	150	150	1923.48
1	110300061	1	30	2	3003	2	1	1	4.1013	1	2	650	150	353.571	150	16.6667	50	0	50	35.7143	1399.72
1	110300081	1	30	2	3004	1	1	1	4.32854	#NULL!	2	450	0	5	64.2857	21.4286	21.4286	0	0	150	680.352
1	110300081	1	30	2	3004	2	1	1	4.32854	#NULL!	2	650	0	192.857	0	35.7143	275	0	0	353.571	1392.46
1	110300111	1	30	2	3005	1	1	1	3.69884	0	4	364.286	0	0	0	35.7143	350	0	21.4286	107.143	815.229
1	110300111	1	30	2	3005	2	1	1	3.69884	0	4	750	0	3.33333	0	35.7143	250	16.6667	107.143	250	1324.35
1	110300121	1	30	2	3006	1	1	1	3.62218	1	4	107.143	0	450	21.4286	21.4286	5	0	64.2857	150	737.971
1	110300121	1	30	2	3006	2	1	1	3.62218	1	4	250	1.66667	64.2857	0	0	21.4286	0	0	21.4286	346.272
1	110300131	1	30	2	3007	1	1	1	3.76454	1	2	450	0	10	0	10	16.6667	0	450	16.6667	898.763
1	110300131	1	30	2	3007	2	1	1	3.76454	1	2	0	0	0	0	0	0	0	0	0	0
1	110300141	1	30	2	3008	1	1	0	3.63587	0	4	250	0	3.33333	0	7.14286	350	0	150	5	709.051
1	110300141	1	30	2	3008	2	1	0	3.63587	0	4	250	0	21.4286	21.4286	21.4286	64.2857	0	150	10	509.016
1	110300151	1	30	2	3009	1	1	1	3.52909	#NULL!	2	450	0	250	0	0	0	0	250	3.33333	901.01
1	110300151	1	30	2	3009	2	1	1	3.52909	#NULL!	2	250	0	10	0	10	64.2857	0	250	117.857	646.13
1	110300161	1	30	2	3010	1	1	1	3.55099	1	2	650	1.66667	0	0	5	64.2857	1.66667	250	21.4286	955.992
1	110300161	1	30	2	3010	2	1	1	3.55099	1	2	550	1.66667	5	0	1.66667	117.857	0	450	64.2857	1118.05
1	110300261	1	30	3	2986	1	1	0	4.67351	0	4	750	0	35.7143	0	64.2857	35.7143	0	550	5	1366.56
1	110300261	1	30	3	2986	2	1	0	4.67351	0	4	1100	0	0	3.33333	7.14286	7.14286	1.66667	1.66667	3.33333	1121.67
1	110300271	1	30	3	2987	1	1	1	4.99384	0	2	510.714	1.66667	50	1.66667	8.33333	35.7143	1.66667	550	150	1215.48
1	110300271	1	30	3	2987	2	1	1	4.99384	0	2	0	0	0	0	0	0	0	0	0	0
1	110300281	1	30	3	2988	1	1	1	4.59959	0	4	550	0	16.6667	16.6667	21.4286	150	0	50	0	778.626
1	110300281	1	30	3	2988	2	1	1	4.59959	0	4	950	0	50	50	5	50	23.3333	0	107.143	1202.38
1	110300291	1	30	3	2989	1	1	1	5.25394	0	4	250	0	192.857	192.857	1.66667	35.7143	0	0	117.857	745.152
1	110300291	1	30	3	2989	2	1	1	5.25394	0	4	235.714	0	35.7143	35.7143	10	64.2857	0	10	117.857	475.759
1	110300301	1	30	3	2990	1	1	0	5.18549	0	2	850	0	10	21.4286	0	64.2857	0	450	21.4286	1357.46
1	110300301	1	30	3	2990	2	1	0	5.18549	0	2	650	1.66667	0	8.33333	1.66667	1.66667	1.66667	350	10	985.502
1	110300311	1	30	3	2991	1	1	0	5.1499	#NULL!	4	21.4286	50	21.4286	21.4286	5	550	107.143	1.66667	64.2857	753.71
1	110300311	1	30	3	2991	2	1	0	5.1499	#NULL!	4	450	150	250	250	16.6667	35.7143	0	0	10	1126.9
1	110300331	1	30	3	2992	1	1	1	4.67077	1	4	450	0	21.4286	64.2857	0	107.143	0	150	64.2857	815.593
1	110300331	1	30	3	2992	2	1	1	4.67077	1	4	550	10	64.2857	21.4286	0	21.4286	0	150	21.4286	809.911
1	110300341	1	30	3	2993	1	1	0	4.46817	0	2	350	0	0	0	21.4286	64.2857	0	107.143	0	521.943
1	110300341	1	30	3	2993	2	1	0	4.46817	0	2	550	0	0	0	35.7143	0	0	107.143	21.4286	695.1
1	110300351	1	30	3	2994	1	1	0	5.3525	0	2	550	10	107.143	107.143	0	64.2857	0	450	21.4286	1239.64
1	110300351	1	30	3	2994	2	1	0	5.3525	0	2	850	64.2857	192.857	192.857	10	21.4286	0	250	21.4286	1547.68
1	110300361	1	30	3	2995	1	1	1	5.18823	0	4	550	0	150	21.4286	35.7143	0	0	150	35.7143	901.307
1	110300361	1	30	3	2995	2	1	1	5.18823	0	4	150	0	50	0	0	196.429	0	3.33333	10	381.031
1	110300411	1	30	3	2996	1	1	1	5.3306	0	2	350	0	350	0	0	3.33333	0	350	0	980.517
1	110300411	1	30	3	2996	2	1	1	5.3306	0	2	450	0	450	0	0	16.6667	0	150	0	1003.48
1	110300471	1	30	4	2979	1	1	1	4.25462	1	2	550	0	0	10	0	1100	0	746.429	10	2214.49
1	110300471	1	30	4	2979	2	1	1	4.25462	1	2	350	0	196.429	0	0	275	0	64.2857	0	828.811
1	110300481	1	30	4	2980	1	1	1	4.03285	1	2	250	0	10	0	3.33333	64.2857	0	150	21.4286	470.994
1	110300481	1	30	4	2980	2	1	1	4.03285	1	2	350	0	5	0	0	35.7143	0	250	0	609.781
1	110300491	1	30	4	2981	1	1	1	4.15332	1	2	450	0	0	107.143	0	150	0	16.6667	35.7143	734.043
1	110300491	1	30	4	2981	2	1	1	4.15332	1	2	250	0	107.143	107.143	5	64.2857	0	0	10	522.307
1	110300511	1	30	4	2982	1	1	1	4.25736	0	2	350	0	150	250	0	107.143	0	250	0	1051.21
1	110300511	1	30	4	2982	2	1	1	4.25736	0	2	117.857	0	64.2857	21.4286	0	10	0	250	10	437.544
1	110300521	1	30	4	2983	1	1	0	4.24641	1	4	350	0	64.2857	0	0	0	0	250	10	639.573
1	110300521	1	30	4	2983	2	1	0	4.24641	1	4	650	0	35.7143	0	16.6667	16.6667	0	250	10	943.454
1	110300541	1	30	4	2984	1	1	0	4.1588	1	2	250	0	21.4286	0	3.33333	5	0	550	150	892.561
1	110300541	1	30	4	2984	2	1	0	4.1588	1	2	350	0	50	0	0	0	0	250	450	991.05
1	110300551	1	30	4	2985	1	1	0	3.93703	0	4	450	35.7143	10	21.4286	0	35.7143	0	450	64.2857	1003.2
1	110300551	1	30	4	2985	2	1	0	3.93703	0	4	250	7.14286	3.33333	21.4286	0	250	0	250	10	735.627
1	110300591	1	30	5	2974	1	1	0	4.65161	1	4	107.143	0	350	275	0	7.14286	0	250	0	923.9
1	110300591	1	30	5	2974	2	1	0	4.65161	1	4	550	1.66667	21.4286	1.66667	1.66667	21.4286	1.66667	150	21.4286	746.417
1	110300631	1	30	5	2975	1	1	1	4.53662	0	2	750	1.66667	1.66667	1.66667	1.66667	35.7143	8.33333	117.857	450	1273.29
1	110300631	1	30	5	2975	2	1	1	4.53662	0	2	1100	1.66667	1.66667	1.66667	0	21.4286	1.66667	196.429	196.429	1463.58
1	110300641	1	30	5	2976	1	1	1	5.32238	#NULL!	2	550	5	50	0	5	5	0	650	0	1189.91
1	110300641	1	30	5	2976	2	1	1	5.32238	#NULL!	2	550	10	150	0	1.66667	1.66667	0	550	0	1189.5
1	110300651	1	30	5	2977	1	1	1	4.79124	0	2	450	0	3.33333	0	0	107.143	0	450	21.4286	968.397
1	110300651	1	30	5	2977	2	1	1	4.79124	0	2	350	1.66667	16.6667	1.66667	1.66667	21.4286	1.66667	350	35.7143	732.765
1	110300661	1	30	5	2978	1	1	1	5.2293	0	4	450	1.66667	3.33333	1.66667	35.7143	1.66667	1.66667	196.429	250	873.424
1	110300661	1	30	5	2978	2	1	1	5.2293	0	4	450	0	21.4286	1.66667	3.33333	3.33333	0	150	50	652.328
1	110310011	1	31	1	3096	1	1	0	3.71526	1	4	275	0	250	10	0	432.143	0	107.143	64.2857	1043.27
1	110310011	1	31	1	3096	2	1	0	3.71526	1	4	250	0	7.14286	0	64.2857	150	0	0	275	674.45
1	110310021	1	31	1	3097	1	1	0	3.49897	0	4	350	0	10	0	0	35.7143	0	107.143	16.6667	500.361
1	110310021	1	31	1	3097	2	1	0	3.49897	0	4	550	0	0	0	0	21.4286	0	196.429	16.6667	758.479
1	110310051	1	31	1	3098	1	1	1	3.51814	0	2	550	0	5	21.4286	0	64.2857	0	550	64.2857	1177.85
1	110310051	1	31	1	3098	2	1	1	3.51814	0	2	650	0	5	10	0	117.857	0	250	0	992.788
1	110310061	1	31	1	3099	1	1	0	3.68241	0	4	0	1.66667	350	1.66667	1.66667	550	1.66667	3.33333	1.66667	814.748
1	110310061	1	31	1	3099	2	1	0	3.68241	0	4	150	1.66667	350	1.66667	1.66667	250	1.66667	64.2857	1.66667	752.24
1	110310091	1	31	2	3068	1	1	0	3.73169	0	2	50	0	7.14286	7.14286	0	10	0	650	21.4286	671.236
1	110310091	1	31	2	3068	2	1	0	3.73169	0	2	250	0	0	16.6667	0	107.143	0	550	0	853.557
1	110310121	1	31	2	3069	1	1	1	3.96715	0	4	21.4286	0	350	0	150	64.2857	0	150	0	659.993
1	110310121	1	31	2	3069	2	1	1	3.96715	0	4	550	0	350	0	150	35.7143	0	350	117.857	1439.52
1	110310131	1	31	2	3070	1	1	0	4.15058	1	4	250	0	0	10	3.33333	107.143	0	350	10	679.384
1	110310131	1	31	2	3070	2	1	0	4.15058	1	4	350	0	10	16.6667	16.6667	16.6667	0	150	16.6667	552.957
1	110310141	1	31	2	3071	1	1	0	4.02738	0	4	550	0	3.33333	0	117.857	117.857	0	250	250	1192.58
1	110310141	1	31	2	3071	2	1	0	4.02738	0	4	750	10	7.14286	1.66667	21.4286	1.66667	10	21.4286	1.66667	817.725
1	110310151	1	31	2	3072	1	1	0	4.02738	#NULL!	2	550	0	3.33333	0	21.4286	10	0	350	0	893.74
1	110310151	1	31	2	3072	2	1	0	4.02738	#NULL!	2	550	0	3.33333	0	0	21.4286	0	250	64.2857	848.797
1	110310161	1	31	2	3073	1	1	0	4.1232	1	2	7.14286	0	250	10	0	275	0	450	64.2857	942.071
1	110310161	1	31	2	3073	2	1	0	4.1232	1	2	450	0	192.857	0	0	10	0	21.4286	10	659.716
1	110310171	1	31	2	3074	1	1	1	4.02738	#NULL!	4	250	10	350	0	0	250	8.33333	250	117.857	1125.48
1	110310171	1	31	2	3074	2	1	1	4.02738	#NULL!	4	950	0	3.33333	0	0	150	0	107.143	250	1389.28
1	110310181	1	31	2	3075	1	1	1	4.02738	#NULL!	2	107.143	1.66667	192.857	192.857	1.66667	35.7143	1.66667	64.2857	192.857	724.981
1	110310181	1	31	2	3075	2	1	1	4.02738	#NULL!	2	0	1.66667	21.4286	21.4286	1.66667	7.14286	1.66667	64.2857	64.2857	162.124
1	110310191	1	31	2	3076	1	1	0	4.02738	#NULL!	2	107.143	1.66667	192.857	192.857	1.66667	35.7143	1.66667	64.2857	235.714	760.467
1	110310191	1	31	2	3076	2	1	0	4.02738	#NULL!	2	0	1.66667	21.4286	21.4286	1.66667	7.14286	1.66667	107.143	64.2857	200.438
1	110310201	1	31	2	3077	1	1	0	4.07118	1	4	150	0	21.4286	0	16.6667	35.7143	0	250	107.143	527.998
1	110310201	1	31	2	3077	2	1	0	4.07118	1	4	150	0	1.66667	1.66667	0	0	0	0	0	153.148
1	110310211	1	31	2	3078	1	1	1	4.14237	1	4	350	0	50	39.2857	1.66667	10	0	3.33333	10	455.476
1	110310211	1	31	2	3078	2	1	1	4.14237	1	4	250	0	250	64.2857	1.66667	21.4286	0	21.4286	3.33333	580.855
1	110310221	1	31	2	3079	1	1	0	4.3258	0	4	350	1.66667	1.66667	21.4286	21.4286	1.66667	1.66667	250	1.66667	621.134
1	110310221	1	31	2	3079	2	1	0	4.3258	0	4	350	1.66667	1.66667	35.7143	35.7143	1.66667	1.66667	150	1.66667	558.505
1	110310231	1	31	2	3080	1	1	0	4.01369	1	4	850	0	35.7143	35.7143	10	350	0	0	150	1362
1	110310231	1	31	2	3080	2	1	0	4.01369	1	4	350	0	64.2857	64.2857	0	21.4286	0	0	64.2857	543.736
1	110310241	1	31	2	3081	1	1	0	3.88227	1	2	196.429	1.66667	21.4286	0	0	450	0	0	10	626.138
1	110310241	1	31	2	3081	2	1	0	3.88227	1	2	750	0	150	0	0	16.6667	0	3.33333	250	1109.66
1	110310251	1	31	2	3082	1	1	1	4.15606	#NULL!	4	450	0	21.4286	1.66667	1.66667	107.143	1.66667	350	196.429	1044.74
1	110310251	1	31	2	3082	2	1	1	4.15606	#NULL!	4	432.143	0	10	0	10	10	0	10	10	476.093
1	110310261	1	31	2	3083	1	1	0	4.10404	0	4	150	21.4286	150	0	5	150	0	150	5	582.417
1	110310261	1	31	2	3083	2	1	0	4.10404	0	4	350	150	350	0	3.33333	10	0	10	3.33333	838.047
1	110310271	1	31	2	3084	1	1	0	4.09856	1	2	321.429	0	750	0	321.429	235.714	30	150	150	1774.01
1	110310271	1	31	2	3084	2	1	0	4.09856	1	2	0	0	0	0	0	0	0	0	0	0
1	110310281	1	31	2	3085	1	1	0	4.10404	0	2	250	0	150	1.66667	16.6667	21.4286	0	250	64.2857	697.033
1	110310281	1	31	2	3085	2	1	0	4.10404	0	2	1100	0	7.14286	0	0	0	0	0	0	1106.42
1	110310301	1	31	3	3046	1	1	1	4.92539	1	2	350	0	150	0	0	250	0	0	64.2857	760.579
1	110310301	1	31	3	3046	2	1	1	4.92539	1	2	550	0	107.143	0	0	150	0	0	150	904.021
1	110310311	1	31	3	3047	1	1	1	5.20739	#NULL!	2	107.143	0	235.714	0	0	353.571	10	150	64.2857	829.757
1	110310311	1	31	3	3047	2	1	1	5.20739	#NULL!	2	550	0	10	0	0	23.3333	0	550	16.6667	1085.26
1	110310331	1	31	3	3048	1	1	1	5.32786	0	2	196.429	0	107.143	0	1.66667	196.429	1.66667	150	64.2857	657.823
1	110310331	1	31	3	3048	2	1	1	5.32786	0	2	550	0	107.143	0	8.33333	107.143	0	150	21.4286	900.888
1	110310351	1	31	3	3049	1	1	1	4.89528	#NULL!	4	21.4286	0	150	0	7.14286	10	0	196.429	250	554.1
1	110310351	1	31	3	3049	2	1	1	4.89528	#NULL!	4	250	0	39.2857	0	35.7143	64.2857	0	250	10	605.884
1	110310361	1	31	3	3050	1	1	0	4.67625	0	2	350	0	50	0	0	117.857	0	107.143	107.143	684.343
1	110310361	1	31	3	3050	2	1	0	4.67625	0	2	550	0	50	0	3.33333	0	0	0	0	597.897
1	110310371	1	31	3	3051	1	1	0	4.97741	0	4	550	0	1.66667	21.4286	0	3.33333	0	39.2857	7.14286	616.715
1	110310371	1	31	3	3051	2	1	0	4.97741	0	4	150	1.66667	5	21.4286	1.66667	21.4286	1.66667	196.429	64.2857	428.205
1	110310381	1	31	3	3052	1	1	0	5.37714	1	4	16.6667	0	21.4286	5	16.6667	35.7143	0	250	35.7143	340.471
1	110310381	1	31	3	3052	2	1	0	5.37714	1	4	0	0	0	0	0	0	0	0	0	0
1	110310391	1	31	3	3053	1	1	1	4.63792	1	4	450	0	35.7143	16.6667	16.6667	35.7143	0	0	150	669.326
1	110310391	1	31	3	3053	2	1	1	4.63792	1	4	550	0	35.7143	35.7143	5	21.4286	0	1.66667	10	650.726
1	110310411	1	31	3	3054	1	1	0	4.70637	0	2	350	0	0	0	3.33333	64.2857	0	350	0	723.061
1	110310411	1	31	3	3054	2	1	0	4.70637	0	2	450	0	0	0	10	107.143	0	350	16.6667	880.897
1	110310451	1	31	3	3055	1	1	1	4.564	#NULL!	2	450	0	1.66667	1.66667	432.143	107.143	0	250	0	1154.02
1	110310451	1	31	3	3055	2	1	1	4.564	#NULL!	2	850	0	21.4286	0	350	350	0	150	0	1624.26
1	110310461	1	31	3	3056	1	1	1	4.68994	#NULL!	2	117.857	0	107.143	21.4286	10	150	10	0	150	510.633
1	110310461	1	31	3	3056	2	1	1	4.68994	#NULL!	2	250	5	107.143	21.4286	16.6667	350	10	10	150	840.604
1	110310471	1	31	3	3057	1	1	0	4.49008	1	4	550	0	21.4286	0	0	150	0	250	35.7143	955.836
1	110310471	1	31	3	3057	2	1	0	4.49008	1	4	350	0	50	0	64.2857	64.2857	0	107.143	0	604.779
1	130320011	1	32	1	3164	1	1	0	4.23546	0	2	350	0	64.2857	10	0	10	0	0	250	633.593
1	130320011	1	32	1	3164	2	1	0	4.23546	0	2	250	0	64.2857	21.4286	0	1.66667	0	64.2857	64.2857	441.19
1	130320021	1	32	1	3165	1	1	0	4.04381	0	4	950	0	107.143	0	0	64.2857	0	3.33333	35.7143	1136.09
1	130320021	1	32	1	3165	2	1	0	4.04381	0	4	275	1.66667	3.33333	1.66667	1.66667	250	1.66667	1.66667	196.429	670.868
1	130320031	1	32	1	3166	1	1	0	3.91513	0	4	250	1.66667	10	1.66667	35.7143	1.66667	1.66667	650	35.7143	907.481
1	130320031	1	32	1	3166	2	1	0	3.91513	0	4	950	1.66667	30	1.66667	35.7143	10	30	450	30	1474
1	130320041	1	32	1	3167	1	1	1	3.91513	0	4	250	1.66667	10	1.66667	21.4286	1.66667	1.66667	650	35.7143	894.853
1	130320041	1	32	1	3167	2	1	1	3.91513	0	4	950	1.66667	30	1.66667	35.7143	16.6667	30	450	30	1479.93
1	130320051	1	32	1	3168	1	1	0	4.14511	0	2	1100	0	0	0	0	117.857	0	0	150	1329.09
1	130320051	1	32	1	3168	2	1	0	4.14511	0	2	250	0	0	0	3.33333	64.2857	0	50	117.857	452.447
1	130320061	1	32	1	3169	1	1	1	4.14784	#NULL!	4	350	0	50	0	16.6667	321.429	0	1100	321.429	1945.3
1	130320061	1	32	1	3169	2	1	1	4.14784	#NULL!	4	1100	0	107.143	0	107.143	150	0	250	35.7143	1677.61
1	130320071	1	32	1	3170	1	1	1	4.26557	0	2	550	0	0	0	0	21.4286	0	350	10	890.251
1	130320071	1	32	1	3170	2	1	1	4.26557	0	2	750	0	0	0	0	3.33333	0	0	0	752.967
1	130320091	1	32	1	3171	1	1	1	3.72895	0	4	250	0	0	0	10	35.7143	0	350	21.4286	621.269
1	130320091	1	32	1	3171	2	1	1	3.72895	0	4	150	0	21.4286	0	5	21.4286	0	250	10	424.536
1	130320101	1	32	1	3172	1	1	0	3.66598	0	2	50	1.66667	21.4286	21.4286	0	5	1.66667	150	192.857	391.829
1	130320101	1	32	1	3172	2	1	0	3.66598	0	2	150	1.66667	7.14286	1.66667	1.66667	21.4286	1.66667	50	10	234.711
1	130320111	1	32	1	3173	1	1	0	4.30664	0	4	350	0	7.14286	0	7.14286	21.4286	0	250	64.2857	658.536
1	130320111	1	32	1	3173	2	1	0	4.30664	0	4	150	0	21.4286	0	7.14286	21.4286	0	250	64.2857	471.379
1	130320121	1	32	1	3174	1	1	1	4.3258	0	4	450	1.66667	3.33333	7.14286	1.66667	1.66667	1.66667	450	64.2857	921.668
1	130320121	1	32	1	3174	2	1	1	4.3258	0	4	250	1.66667	1.66667	7.14286	1.66667	3.33333	1.66667	450	3.33333	671.185
1	130320231	1	32	2	3155	1	1	0	3.78097	0	2	750	0	107.143	1.66667	21.4286	107.143	1.66667	250	35.7143	1216.79
1	130320231	1	32	2	3155	2	1	0	3.78097	0	2	250	0	107.143	0	35.7143	0	0	250	35.7143	630.964
1	130320241	1	32	2	3156	1	1	1	4.10951	0	4	350	1.66667	1.66667	1.66667	1.66667	150	1.66667	1.66667	350	782.527
1	130320241	1	32	2	3156	2	1	1	4.10951	0	4	250	0	0	0	0	117.857	0	7.14286	250	568.279
1	130320261	1	32	2	3157	1	1	0	4.4271	0	2	550	1.66667	1.66667	1.66667	16.6667	350	1.66667	196.429	1.66667	1059.48
1	130320261	1	32	2	3157	2	1	0	4.4271	0	2	450	1.66667	3.33333	1.66667	3.33333	275	1.66667	64.2857	1.66667	764.31
1	130320271	1	32	2	3158	1	1	0	3.69062	0	2	350	21.4286	150	1.66667	1.66667	64.2857	1.66667	64.2857	64.2857	678.745
1	130320271	1	32	2	3158	2	1	0	3.69062	0	2	250	64.2857	150	5	5	350	5	196.429	64.2857	1003.13
1	130320281	1	32	2	3159	1	1	0	3.718	1	2	550	0	0	0	0	0	0	0	64.2857	603.229
1	130320281	1	32	2	3159	2	1	0	3.718	1	2	450	0	21.4286	21.4286	10	117.857	0	0	0	604.211
1	130320291	1	32	2	3160	1	1	0	4.17248	0	2	450	0	0	0	0	0	0	196.429	117.857	723.193
1	130320291	1	32	2	3160	2	1	0	4.17248	0	2	550	0	0	0	0	0	0	39.2857	0	585.121
1	130320301	1	32	2	3161	1	1	1	4.33128	0	2	550	0	16.6667	0	21.4286	117.857	0	450	21.4286	1108.86
1	130320301	1	32	2	3161	2	1	1	4.33128	0	2	0	0	0	0	0	0	0	0	0	0
1	130320321	1	32	2	3162	1	1	0	3.86311	0	4	250	0	0	0	0	0	0	550	117.857	839.286
1	130320321	1	32	2	3162	2	1	0	3.86311	0	4	107.143	0	0	0	0	0	0	0	0	107.143
1	130320331	1	32	2	3163	1	1	0	4.13963	0	2	550	0	21.4286	3.33333	1.66667	64.2857	0	350	64.2857	997.38
1	130320331	1	32	2	3163	2	1	0	4.13963	0	2	750	0	35.7143	0	0	64.2857	0	250	10	1071.1
1	130320401	1	32	3	3148	1	1	1	4.19165	0	2	550	0	0	0	21.4286	0	0	21.4286	117.857	685.686
1	130320401	1	32	3	3148	2	1	1	4.19165	0	2	750	0	0	0	35.7143	35.7143	0	250	35.7143	1066.43
1	130320421	1	32	3	3149	1	1	1	4.05476	0	4	650	0	0	0	0	0	0	350	250	1169.9
1	130320421	1	32	3	3149	2	1	1	4.05476	0	4	350	0	0	0	0	150	0	250	10	715.28
1	130320431	1	32	3	3150	1	1	0	3.73443	0	4	450	0	0	0	0	10	0	350	117.857	869.386
1	130320431	1	32	3	3150	2	1	0	3.73443	0	4	550	0	0	0	0	35.7143	0	250	35.7143	834.857
1	130320441	1	32	3	3151	1	1	0	3.78919	#NULL!	2	750	0	0	0	0	250	0	0	275	1200.2
1	130320441	1	32	3	3151	2	1	0	3.78919	#NULL!	2	850	0	0	0	1.66667	64.2857	0	0	64.2857	961.916
1	130320451	1	32	3	3152	1	1	1	4.00274	0	2	350	0	0	3.33333	0	0	0	0	21.4286	371.043
1	130320451	1	32	3	3152	2	1	1	4.00274	0	2	350	0	3.33333	3.33333	0	10	0	0	350	654.997
1	130320471	1	32	3	3153	1	1	0	3.81656	0	4	350	0	0	0	1.66667	21.4286	0	550	21.4286	879.988
1	130320471	1	32	3	3153	2	1	0	3.81656	0	4	650	0	1.66667	3.33333	1.66667	39.2857	0	21.4286	3.33333	713.153
1	130320481	1	32	3	3154	1	1	0	3.7399	0	4	39.2857	0	7.14286	0	0	7.14286	0	150	39.2857	218.693
1	130320481	1	32	3	3154	2	1	0	3.7399	0	4	150	0	21.4286	0	0	3.33333	0	150	21.4286	324.074
1	130320581	1	32	4	3142	1	1	1	4.92813	0	2	250	0	50	0	0	10	0	350	117.857	714.336
1	130320581	1	32	4	3142	2	1	1	4.92813	0	2	250	0	16.6667	0	0	35.7143	0	250	0	520.269
1	130320601	1	32	4	3143	1	1	0	5.20465	0	2	350	0	21.4286	0	1.66667	7.14286	0	64.2857	3.33333	437.326
1	130320601	1	32	4	3143	2	1	0	5.20465	0	2	250	0	0	0	10	10	0	350	64.2857	633.869
1	130320611	1	32	4	3144	1	1	0	5.25941	0	2	350	0	64.2857	0	0	64.2857	0	117.857	117.857	667.957
1	130320611	1	32	4	3144	2	1	0	5.25941	0	2	250	0	107.143	0	3.33333	7.14286	0	64.2857	21.4286	430.84
1	130320621	1	32	4	3145	1	1	1	4.46817	0	4	150	1.66667	1.66667	1.66667	10	196.429	1.66667	1.66667	117.857	439
1	130320621	1	32	4	3145	2	1	1	4.46817	0	4	350	0	5	5	10	196.429	10	64.2857	21.4286	627.021
1	130320631	1	32	4	3146	1	1	1	5.14168	0	4	250	0	0	7.14286	0	21.4286	0	450	21.4286	696.186
1	130320631	1	32	4	3146	2	1	1	5.14168	0	4	650	0	1.66667	3.33333	0	39.2857	0	21.4286	3.33333	711.68
1	130320641	1	32	4	3147	1	1	1	4.87064	#NULL!	2	550	0	0	3.33333	50	117.857	0	0	0	702.393
1	130320641	1	32	4	3147	2	1	1	4.87064	#NULL!	2	150	0	0	0	0	0	0	0	0	150
1	130320791	1	32	5	3136	1	1	1	4.79398	0	2	350	0	35.7143	0	0	250	0	350	150	1041.71
1	130320791	1	32	5	3136	2	1	1	4.79398	0	2	350	0	107.143	0	0	150	0	150	64.2857	767.15
1	130320801	1	32	5	3137	1	1	1	4.49008	#NULL!	4	350	0	21.4286	0	0	10	0	550	150	994.064
1	130320801	1	32	5	3137	2	1	1	4.49008	#NULL!	4	650	0	35.7143	10	0	0	0	550	35.7143	1213.28
1	130320821	1	32	5	3138	1	1	1	4.86242	0	2	350	3.33333	3.33333	0	7.14286	21.4286	1.66667	850	0	1143.06
1	130320821	1	32	5	3138	2	1	1	4.86242	0	2	150	16.6667	21.4286	0	10	21.4286	0	650	0	794.926
1	130320831	1	32	5	3139	1	1	1	4.86242	0	2	650	0	0	0	10	21.4286	0	450	21.4286	1097.95
1	130320831	1	32	5	3139	2	1	1	4.86242	0	2	550	0	35.7143	0	0	21.4286	0	450	35.7143	1033.05
1	130320841	1	32	5	3140	1	1	0	5.00753	#NULL!	4	250	0	0	0	0	0	0	450	117.857	749.886
1	130320841	1	32	5	3140	2	1	0	5.00753	#NULL!	4	107.143	0	0	0	0	0	0	550	196.429	761.486
1	130320861	1	32	5	3141	1	1	0	4.97467	0	2	1100	0	16.6667	0	5	0	0	450	117.857	1619.29
1	130320861	1	32	5	3141	2	1	0	4.97467	0	2	0	1.66667	3.33333	1.66667	64.2857	1.66667	1.66667	250	5	293.714
1	130320991	1	32	6	3128	1	1	0	5.11431	0	4	450	1.66667	64.2857	64.2857	1.66667	10	1.66667	21.4286	350	893.881
1	130320991	1	32	6	3128	2	1	0	5.11431	0	4	550	0	107.143	16.6667	10	10	0	0	350	970.361
1	130321011	1	32	6	3129	1	1	1	4.74743	1	4	21.4286	1.66667	1.66667	50	1.66667	150	1.66667	250	196.429	596.658
1	130321011	1	32	6	3129	2	1	1	4.74743	1	4	150	0	0	64.2857	0	107.143	0	117.857	64.2857	467.593
1	130321021	1	32	6	3130	1	1	0	5.43463	0	2	150	0	21.4286	0	10	107.143	0	250	21.4286	514.704
1	130321021	1	32	6	3130	2	1	0	5.43463	0	2	350	0	35.7143	0	0	107.143	0	250	0	700.964
1	130321031	1	32	6	3131	1	1	1	5.44285	0	2	550	0	7.14286	0	64.2857	7.14286	0	350	21.4286	950.25
1	130321031	1	32	6	3131	2	1	1	5.44285	0	2	750	0	7.14286	0	7.14286	7.14286	0	150	64.2857	956.421
1	130321041	1	32	6	3132	1	1	1	4.9692	0	2	64.2857	0	0	0	5	64.2857	0	64.2857	250	390.391
1	130321041	1	32	6	3132	2	1	1	4.9692	0	2	21.4286	0	0	0	5	64.2857	0	64.2857	450	513.134
1	130321051	1	32	6	3133	1	1	1	5.36893	0	2	150	0	1.66667	0	1.66667	450	0	50	10	606.452
1	130321051	1	32	6	3133	2	1	1	5.36893	0	2	150	0	0	0	1.66667	50	0	50	117.857	338.259
1	130321071	1	32	6	3134	1	1	0	5.17728	#NULL!	4	650	0	21.4286	0	3.33333	7.14286	0	64.2857	10	744.32
1	130321071	1	32	6	3134	2	1	0	5.17728	#NULL!	4	650	0	16.6667	0	10	35.7143	0	64.2857	107.143	851.795
1	130321081	1	32	6	3135	1	1	0	4.75565	#NULL!	2	250	0	10	0	0	64.2857	0	150	21.4286	468.047
1	130321081	1	32	6	3135	2	1	0	4.75565	#NULL!	2	350	1.66667	1.66667	1.66667	1.66667	7.14286	1.66667	150	1.66667	499.574
1	130321211	1	32	7	3122	1	1	0	4.24914	0	4	3.33333	0	0	0	0	0	0	250	196.429	389.476
1	130321211	1	32	7	3122	2	1	0	4.24914	0	4	0	0	21.4286	0	350	35.7143	0	0	250	567.45
1	130321221	1	32	7	3123	1	1	0	3.90144	0	2	550	0	0	0	0	0	0	250	107.143	862.214
1	130321221	1	32	7	3123	2	1	0	3.90144	0	2	650	0	0	0	3.33333	0	0	250	150	1000.65
1	130321231	1	32	7	3124	1	1	0	4.2601	0	2	350	0	0	0	0	150	0	0	150	607.7
1	130321231	1	32	7	3124	2	1	0	4.2601	0	2	350	1.66667	1.66667	1.66667	1.66667	150	1.66667	1.66667	1.66667	494.107
1	130321241	1	32	7	3125	1	1	1	3.87406	0	2	250	1.66667	3.33333	1.66667	10	21.4286	1.66667	250	1.66667	510.553
1	130321241	1	32	7	3125	2	1	1	3.87406	0	2	450	1.66667	3.33333	1.66667	1.66667	64.2857	1.66667	250	3.33333	742.709
1	130321251	1	32	7	3126	1	1	1	4.36413	#NULL!	2	0	1.66667	7.14286	1.66667	8.33333	21.4286	1.66667	0	64.2857	90.8531
1	130321251	1	32	7	3126	2	1	1	4.36413	#NULL!	2	150	1.66667	21.4286	1.66667	3.33333	3.33333	1.66667	150	3.33333	316.803
1	130321281	1	32	7	3127	1	1	1	3.91513	0	4	450	0	1.66667	1.66667	0	21.4286	0	3.33333	64.2857	528.428
1	130321281	1	32	7	3127	2	1	1	3.91513	0	4	550	1.66667	1.66667	1.66667	10	35.7143	1.66667	21.4286	21.4286	633.789
1	130321381	1	32	8	3119	1	1	0	5.22382	0	4	850	0	35.7143	35.7143	0	16.6667	0	350	64.2857	1298.43
1	130321381	1	32	8	3119	2	1	0	5.22382	0	4	650	0	35.7143	35.7143	5	10	0	350	10	1051.96
1	130321391	1	32	8	3120	1	1	0	4.90349	0	2	550	0	0	0	21.4286	21.4286	0	5	250	799.484
1	130321391	1	32	8	3120	2	1	0	4.90349	0	2	450	0	0	0	7.14286	7.14286	0	150	150	720.971
1	130321411	1	32	8	3121	1	1	0	4.98836	0	4	1100	0	0	0	0	64.2857	0	450	0	1559.51
1	130321411	1	32	8	3121	2	1	0	4.98836	0	4	950	0	10	0	0	0	0	250	0	1182.49
1	120330051	1	33	1	3204	1	1	1	4.15606	0	2	450	7.14286	0	0	0	0	0	5	64.2857	514.834
1	120330051	1	33	1	3204	2	1	1	4.15606	0	2	550	64.2857	0	0	0	21.4286	0	0	64.2857	686.521
1	120330071	1	33	1	3205	1	1	1	4.23272	#NULL!	2	550	0	0	0	1.66667	10	0	0	250	767.373
1	120330071	1	33	1	3205	2	1	1	4.23272	#NULL!	2	0	1.66667	0	0	1.66667	1.66667	1.66667	10	250	222.012
1	120330081	1	33	1	3206	1	1	1	4.15332	0	4	250	0	64.2857	21.4286	10	10	0	450	0	749.047
1	120330081	1	33	1	3206	2	1	1	4.15332	0	4	550	0	35.7143	107.143	10	64.2857	0	250	0	977.733
1	120330091	1	33	1	3207	1	1	1	3.64408	0	4	850	0	0	0	0	0	0	350	0	1162.9
1	120330091	1	33	1	3207	2	1	1	3.64408	0	4	950	0	0	0	21.4286	0	0	250	0	1192.44
1	120330111	1	33	1	3208	1	1	0	4.39151	1	2	550	0	35.7143	0	8.33333	16.6667	0	250	0	827.807
1	120330111	1	33	1	3208	2	1	0	4.39151	1	2	550	0	35.7143	50	16.6667	16.6667	0	250	0	884.674
1	120330121	1	33	1	3209	1	1	0	3.68515	1	2	550	0	0	0	0	107.143	0	1100	107.143	1717.47
1	120330121	1	33	1	3209	2	1	0	3.68515	1	2	0	0	64.2857	64.2857	3.33333	250	0	650	0	927.982
1	120330131	1	33	1	3210	1	1	1	4.06297	0	2	750	0	0	0	10	0	0	250	21.4286	1000.08
1	120330131	1	33	1	3210	2	1	1	4.06297	0	2	650	0	0	0	64.2857	10	0	250	21.4286	956.971
1	120330141	1	33	1	3211	1	1	0	3.70705	1	4	450	0	64.2857	1.66667	1.66667	3.33333	1.66667	21.4286	150	658.69
1	120330141	1	33	1	3211	2	1	0	3.70705	1	4	450	0	10	0	0	0	0	0	50	500.39
1	120330211	1	33	2	3198	1	1	0	4.18891	#NULL!	2	250	0	50	0	0	10	0	16.6667	550	774.15
1	120330211	1	33	2	3198	2	1	0	4.18891	#NULL!	2	353.571	0	117.857	1.66667	1.66667	16.6667	0	0	150	601.682
1	120330251	1	33	2	3199	1	1	0	4.35592	1	4	250	0	35.7143	0	0	107.143	0	10	107.143	475.119
1	120330251	1	33	2	3199	2	1	0	4.35592	1	4	0	0	107.143	0	0	64.2857	0	0	117.857	251.121
1	120330261	1	33	2	3200	1	1	1	3.69884	1	2	450	0	150	0	21.4286	64.2857	0	64.2857	117.857	816.064
1	120330261	1	33	2	3200	2	1	1	3.69884	1	2	350	0	250	196.429	0	107.143	0	16.6667	107.143	968.186
1	120330271	1	33	2	3201	1	1	1	3.49624	1	2	550	0	107.143	0	8.33333	16.6667	0	250	0	892.021
1	120330271	1	33	2	3201	2	1	1	3.49624	1	2	550	0	35.7143	50	0	0	0	250	0	855.107
1	120330281	1	33	2	3202	1	1	1	3.9206	#NULL!	4	450	3.33333	450	1.66667	10	64.2857	1.66667	0	150	1051.23
1	120330281	1	33	2	3202	2	1	1	3.9206	#NULL!	4	450	107.143	350	1.66667	21.4286	196.429	5	196.429	107.143	1335.77
1	120330301	1	33	2	3203	1	1	0	3.90965	#NULL!	2	0	0	0	0	0	0	0	0	0	0
1	120330301	1	33	2	3203	2	1	0	3.90965	#NULL!	2	0	0	64.2857	64.2857	3.33333	250	0	650	0	927.982
1	120330341	1	33	3	3192	1	1	1	5.39904	#NULL!	4	550	1.66667	35.7143	0	10	64.2857	1.66667	746.429	1.66667	1319.96
1	120330341	1	33	3	3192	2	1	1	5.39904	#NULL!	4	350	1.66667	3.33333	1.66667	3.33333	1.66667	3.33333	50	1.66667	409.722
1	120330351	1	33	3	3193	1	1	0	4.64066	1	2	550	0	10	0	10	107.143	0	250	107.143	975.401
1	120330351	1	33	3	3193	2	1	0	4.64066	1	2	250	0	16.6667	0	3.33333	7.14286	0	50	21.4286	336.73
1	120330371	1	33	3	3194	1	1	0	5.37166	1	4	550	0	10	10	5	35.7143	0	250	35.7143	858.167
1	120330371	1	33	3	3194	2	1	0	5.37166	1	4	850	0	35.7143	0	21.4286	35.7143	35.7143	150	21.4286	1115.75
1	120330401	1	33	3	3195	1	1	1	5.21287	1	2	650	10	64.2857	0	5	0	0	150	350	1146.1
1	120330401	1	33	3	3195	2	1	1	5.21287	1	2	850	10	107.143	8.33333	8.33333	150	0	107.143	192.857	1360.9
1	120330411	1	33	3	3196	1	1	1	5.44285	1	2	450	0	21.4286	0	10	64.2857	0	64.2857	0	592.79
1	120330411	1	33	3	3196	2	1	1	5.44285	1	2	450	0	21.4286	0	35.7143	35.7143	0	150	0	666.721
1	120330431	1	33	3	3197	1	1	0	4.48186	0	2	650	1.66667	1.66667	1.66667	1.66667	1.66667	1.66667	350	1.66667	973.5
1	120330431	1	33	3	3197	2	1	0	4.48186	0	2	550	1.66667	1.66667	1.66667	1.66667	1.66667	1.66667	350	1.66667	873.5
1	120330521	1	33	4	3188	1	1	1	4.69268	0	4	550	0	0	0	35.7143	107.143	8.33333	550	107.143	1264.59
1	120330521	1	33	4	3188	2	1	1	4.69268	0	4	750	0	1.66667	1.66667	107.143	107.143	10	550	250	1650.62
1	120330541	1	33	4	3189	1	1	1	4.73648	0	2	0	0	10	0	0	10	0	650	10	607.27
1	120330541	1	33	4	3189	2	1	1	4.73648	0	2	350	0	64.2857	0	0	64.2857	0	250	64.2857	741.736
1	120330581	1	33	4	3190	1	1	0	4.46817	0	2	950	3.33333	1.66667	1.66667	64.2857	64.2857	5	0	3.33333	1077.63
1	120330581	1	33	4	3190	2	1	0	4.46817	0	2	850	7.14286	16.6667	0	7.14286	3.33333	3.33333	0	10	892.58
1	120330601	1	33	4	3191	1	1	0	4.90623	0	2	0	0	35.7143	0	0	64.2857	0	350	5	406.361
1	120330601	1	33	4	3191	2	1	0	4.90623	0	2	450	1.66667	8.33333	5	5	10	1.66667	117.857	1.66667	585.621
1	130340011	1	34	1	3305	1	1	0	3.78919	0	2	0	0	0	0	0	0	0	50	0	44.7
1	130340011	1	34	1	3305	2	1	0	3.78919	0	2	0	0	0	0	0	0	0	0	0	0
1	130340021	1	34	1	3306	1	1	1	3.75633	#NULL!	4	350	0	35.7143	16.6667	0	10	0	550	35.7143	928.779
1	130340021	1	34	1	3306	2	1	1	3.75633	#NULL!	4	550	0	10	5	5	10	5	107.143	35.7143	706.967
1	130340031	1	34	1	3307	1	1	1	3.63313	#NULL!	4	250	0	150	0	35.7143	196.429	0	21.4286	150	734.6
1	130340031	1	34	1	3307	2	1	1	3.63313	#NULL!	4	250	0	150	21.4286	64.2857	21.4286	0	64.2857	150	663.636
1	130340061	1	34	1	3308	1	1	1	3.96988	1	2	250	3.33333	107.143	0	0	150	0	21.4286	21.4286	520.051
1	130340061	1	34	1	3308	2	1	1	3.96988	1	2	450	1.66667	250	0	3.33333	117.857	0	35.7143	10	824.463
1	130340071	1	34	1	3309	1	1	1	3.83573	0	4	150	1.66667	150	1.66667	3.33333	107.143	1.66667	3.33333	0	390.899
1	130340071	1	34	1	3309	2	1	1	3.83573	0	4	850	1.66667	21.4286	21.4286	1.66667	35.7143	1.66667	7.14286	150	1057.44
1	130340081	1	34	1	3310	1	1	0	3.59206	0	4	150	1.66667	64.2857	3.33333	3.33333	196.429	0	550	0	882.226
1	130340081	1	34	1	3310	2	1	0	3.59206	0	4	50	1.66667	35.7143	35.7143	10	21.4286	1.66667	7.14286	21.4286	172.619
1	130340091	1	34	1	3311	1	1	1	4.04381	1	2	450	0	10	3.33333	0	3.33333	0	432.143	10	859.872
1	130340091	1	34	1	3311	2	1	1	4.04381	1	2	350	0	7.14286	21.4286	0	250	0	0	0	600.136
1	130340111	1	34	1	3312	1	1	0	4.28474	#NULL!	4	250	0	0	0	0	0	0	7.14286	550	711.786
1	130340111	1	34	1	3312	2	1	0	4.28474	#NULL!	4	350	0	0	0	0	0	0	350	10	671.18
1	130340121	1	34	1	3313	1	1	1	4.29021	0	2	650	0	0	0	0	0	0	50	50	736.1
1	130340121	1	34	1	3313	2	1	1	4.29021	0	2	550	0	0	0	0	0	0	0	21.4286	567.743
1	130340131	1	34	1	3314	1	1	1	3.93429	#NULL!	2	150	0	35.7143	35.7143	10	10	0	350	35.7143	577.676
1	130340131	1	34	1	3314	2	1	1	3.93429	#NULL!	2	0	0	0	0	0	0	0	0	0	0
1	130340141	1	34	1	3315	1	1	1	3.87953	1	4	650	0	0	0	21.4286	64.2857	0	250	21.4286	967.4
1	130340141	1	34	1	3315	2	1	1	3.87953	1	4	350	0	0	0	3.33333	150	0	117.857	64.2857	645.04
1	130340151	1	34	1	3316	1	1	1	4.29843	0	4	550	1.66667	1.66667	1.66667	1.66667	1.66667	1.66667	64.2857	0	616.691
1	130340151	1	34	1	3316	2	1	1	4.29843	0	4	550	1.66667	1.66667	1.66667	1.66667	1.66667	1.66667	450	5	965.66
1	130340161	1	34	1	3317	1	1	0	4.05476	#NULL!	2	550	0	64.2857	0	0	150	0	350	0	1054.19
1	130340161	1	34	1	3317	2	1	0	4.05476	#NULL!	2	550	0	21.4286	0	64.2857	64.2857	0	250	0	906.807
1	130340171	1	34	1	3318	1	1	0	3.93703	0	4	350	0	0	0	0	7.14286	0	0	50	397.757
1	130340171	1	34	1	3318	2	1	0	3.93703	0	4	0	0	0	0	0	0	0	0	0	0
1	130340181	1	34	1	3319	1	1	0	4.29843	#NULL!	2	550	1.66667	1.66667	1.66667	1.66667	1.66667	1.66667	450	107.143	1050.23
1	130340181	1	34	1	3319	2	1	0	4.29843	#NULL!	2	450	1.66667	107.143	1.66667	1.66667	107.143	1.66667	250	64.2857	924.645
1	130340211	1	34	2	3282	1	1	1	4.21355	1	2	350	0	21.4286	0	3.33333	21.4286	0	3.33333	3.33333	397.022
1	130340211	1	34	2	3282	2	1	1	4.21355	1	2	950	0	10	0	0	250	0	16.6667	21.4286	1214.13
1	130340241	1	34	2	3283	1	1	1	4.0219	1	4	107.143	1.66667	35.7143	50	1.66667	107.143	1.66667	150	10	431.075
1	130340241	1	34	2	3283	2	1	1	4.0219	1	4	350	1.66667	35.7143	50	0	10	64.2857	21.4286	16.6667	531.058
1	130340251	1	34	2	3284	1	1	1	3.90691	0	4	450	0	0	250	107.143	150	35.7143	0	16.6667	970.586
1	130340251	1	34	2	3284	2	1	1	3.90691	0	4	510.714	0	16.6667	0	0	150	16.6667	21.4286	16.6667	706.655
1	130340261	1	34	2	3285	1	1	1	3.89049	1	4	350	0	35.7143	0	150	50	8.33333	196.429	350	1031.86
1	130340261	1	34	2	3285	2	1	1	3.89049	1	4	450	0	450	0	21.4286	107.143	0	250	250	1399.35
1	130340271	1	34	2	3286	1	1	1	3.60027	1	4	275	0	35.7143	192.857	1.66667	107.143	0	0	550	1050.27
1	130340271	1	34	2	3286	2	1	1	3.60027	1	4	510.714	0	0	16.6667	0	23.3333	0	0	350	837.781
1	130340281	1	34	2	3287	1	1	0	3.75086	#NULL!	4	250	0	0	0	21.4286	64.2857	0	64.2857	64.2857	436.857
1	130340281	1	34	2	3287	2	1	0	3.75086	#NULL!	4	450	0	0	0	21.4286	21.4286	0	250	10	719.794
1	130340311	1	34	2	3288	1	1	0	3.64408	1	4	250	0	21.4286	0	0	39.2857	0	150	0	438.329
1	130340311	1	34	2	3288	2	1	0	3.64408	1	4	450	0	7.14286	0	0	150	0	0	3.33333	592.681
1	130340331	1	34	2	3289	1	1	1	3.65229	#NULL!	2	450	0	21.4286	21.4286	21.4286	21.4286	0	150	64.2857	715.821
1	130340331	1	34	2	3289	2	1	1	3.65229	#NULL!	2	650	0	7.14286	21.4286	10	21.4286	0	64.2857	10	771.299
1	130340341	1	34	2	3290	1	1	1	3.66324	#NULL!	4	750	0	0	0	3.33333	1.66667	0	250	21.4286	995.673
1	130340341	1	34	2	3290	2	1	1	3.66324	#NULL!	4	1100	0	0	0	1.66667	1.66667	0	150	50	1278.46
1	130340361	1	34	2	3291	1	1	1	4.29295	0	2	450	0	3.33333	0	10	107.143	0	250	64.2857	833.922
1	130340361	1	34	2	3291	2	1	1	4.29295	0	2	450	0	21.4286	10	0	16.6667	0	350	107.143	895.612
1	130340371	1	34	2	3292	1	1	0	4.04654	0	2	150	1.66667	1.66667	1.66667	1.66667	35.7143	1.66667	1.66667	450	563.612
1	130340371	1	34	2	3292	2	1	0	4.04654	0	2	196.429	1.66667	8.33333	8.33333	1.66667	107.143	1.66667	1.66667	450	686.206
1	130340391	1	34	3	3261	1	1	0	4.87885	#NULL!	4	350	0	21.4286	16.6667	10	16.6667	0	35.7143	35.7143	470.938
1	130340391	1	34	3	3261	2	1	0	4.87885	#NULL!	4	850	0	36.6667	8.33333	30	23.3333	0	35.7143	23.3333	989.749
1	130340401	1	34	3	3262	1	1	1	5.11978	0	4	150	1.66667	21.4286	21.4286	1.66667	1.66667	1.66667	150	64.2857	383.879
1	130340401	1	34	3	3262	2	1	1	5.11978	0	4	350	0	35.7143	35.7143	10	35.7143	0	350	16.6667	784.79
1	130340421	1	34	3	3263	1	1	1	4.90623	1	2	250	0	7.14286	0	0	64.2857	0	117.857	0	419
1	130340421	1	34	3	3263	2	1	1	4.90623	1	2	250	0	7.14286	0	1.66667	10	0	117.857	0	372.159
1	130340431	1	34	3	3264	1	1	1	5.31417	1	4	450	0	7.14286	0	0	196.429	0	117.857	10	744.887
1	130340431	1	34	3	3264	2	1	1	5.31417	1	4	350	0	21.4286	0	5	64.2857	0	150	64.2857	618.227
1	130340441	1	34	3	3265	1	1	1	4.66804	0	2	39.2857	0	250	0	21.4286	0	0	150	107.143	505.793
1	130340441	1	34	3	3265	2	1	1	4.66804	0	2	0	0	0	0	0	0	0	0	0	0
1	130340451	1	34	3	3266	1	1	0	4.65435	0	2	450	0	35.7143	35.7143	0	0	0	250	5	745.104
1	130340451	1	34	3	3266	2	1	0	4.65435	0	2	850	0	35.7143	16.6667	21.4286	0	0	250	5	1145.19
1	130340461	1	34	3	3267	1	1	1	4.63518	1	2	21.4286	0	150	64.2857	0	64.2857	0	0	150	401.336
1	130340461	1	34	3	3267	2	1	1	4.63518	1	2	150	0	0	64.2857	0	0	0	0	0	213.643
1	130340471	1	34	3	3268	1	1	0	4.92813	1	2	50	0	107.143	0	1.66667	650	5	150	10	873.025
1	130340471	1	34	3	3268	2	1	0	4.92813	1	2	10	5	21.4286	0	5	10	0	250	5	275.219
1	130340481	1	34	3	3269	1	1	0	4.41342	#NULL!	2	450	0	0	0	0	0	0	450	0	852.3
1	130340481	1	34	3	3269	2	1	0	4.41342	#NULL!	2	0	0	0	0	0	0	0	0	0	0
1	130340491	1	34	3	3270	1	1	1	5.29227	0	4	107.143	1.66667	35.7143	1.66667	1.66667	10	1.66667	250	1.66667	379.268
1	130340491	1	34	3	3270	2	1	1	5.29227	0	4	350	1.66667	7.14286	1.66667	10	16.6667	1.66667	250	1.66667	609.74
1	130340501	1	34	3	3271	1	1	0	4.8898	0	2	250	0	250	7.14286	0	64.2857	0	150	35.7143	702.707
1	130340501	1	34	3	3271	2	1	0	4.8898	0	2	250	1.66667	150	150	5	107.143	1.66667	250	35.7143	889.314
1	130340511	1	34	3	3272	1	1	0	4.67351	0	2	950	0	0	0	0	150	0	250	10	1315.28
1	130340511	1	34	3	3272	2	1	0	4.67351	0	2	450	1.66667	1.66667	1.66667	1.66667	107.143	1.66667	150	21.4286	704.937
1	130340521	1	34	3	3273	1	1	0	4.5065	0	2	550	0	7.14286	0	16.6667	117.857	0	10	10	693.268
1	130340521	1	34	3	3273	2	1	0	4.5065	0	2	650	0	35.7143	0	0	21.4286	0	64.2857	0	758.65
1	130340541	1	34	3	3274	1	1	0	5.29774	0	2	350	0	21.4286	0	10	107.143	0	250	5	701.101
1	130340541	1	34	3	3274	2	1	0	5.29774	0	2	250	0	64.2857	0	21.4286	107.143	0	350	10	743.273
1	130340551	1	34	3	3275	1	1	0	4.75291	0	4	750	0	0	23.3333	0	0	0	450	16.6667	1189.2
1	130340551	1	34	3	3275	2	1	0	4.75291	0	4	550	0	16.6667	16.6667	0	21.4286	0	350	16.6667	927.255
1	130340571	1	34	3	3276	1	1	1	4.57221	0	2	650	0	350	0	0	16.6667	0	0	10	987.763
1	130340571	1	34	3	3276	2	1	1	4.57221	0	2	650	0	64.2857	7.14286	0	21.4286	0	0	21.4286	751.679
1	130340611	1	34	4	3239	1	1	0	4.67077	0	4	250	0	21.4286	0	3.33333	0	0	0	0	272.211
1	130340611	1	34	4	3239	2	1	0	4.67077	0	4	850	0	107.143	0	7.14286	150	0	0	10	1094.42
1	130340631	1	34	4	3240	1	1	1	4.39151	1	4	150	0	3.33333	0	35.7143	107.143	0	450	21.4286	699.968
1	130340631	1	34	4	3240	2	1	1	4.39151	1	4	0	0	0	0	0	0	0	0	0	0
1	130340641	1	34	4	3241	1	1	0	4.99932	0	4	250	1.66667	107.143	1.66667	21.4286	64.2857	1.66667	1.66667	550	884.134
1	130340641	1	34	4	3241	2	1	0	4.99932	0	4	350	1.66667	21.4286	1.66667	1.66667	21.4286	1.66667	21.4286	450	786.331
1	130340661	1	34	4	3242	1	1	0	4.55305	0	4	750	1.66667	3.33333	1.66667	21.4286	35.7143	1.66667	450	1.66667	1212.17
1	130340661	1	34	4	3242	2	1	0	4.55305	0	4	550	0	16.6667	0	35.7143	107.143	0	550	0	1183.61
1	130340681	1	34	4	3243	1	1	0	4.36961	0	2	0	0	350	0	0	350	0	64.2857	0	683.621
1	130340681	1	34	4	3243	2	1	0	4.36961	0	2	750	0	450	0	0	450	0	0	192.857	1714.74
1	130340691	1	34	4	3244	1	1	1	4.61328	1	4	550	0	64.2857	0	0	64.2857	0	350	196.429	1140.55
1	130340691	1	34	4	3244	2	1	1	4.61328	1	4	550	1.66667	107.143	1.66667	1.66667	107.143	1.66667	1.66667	196.429	912.05
1	130340711	1	34	4	3245	1	1	0	4.69815	1	4	450	3.33333	7.14286	3.33333	1.66667	64.2857	1.66667	150	10	665.569
1	130340711	1	34	4	3245	2	1	0	4.69815	1	4	550	8.33333	64.2857	5	8.33333	107.143	0	350	35.7143	1066.26
1	130340731	1	34	4	3246	1	1	0	4.8679	#NULL!	2	350	0	50	0	0	250	0	0	0	617.45
1	130340731	1	34	4	3246	2	1	0	4.8679	#NULL!	2	650	0	39.2857	0	0	35.7143	0	0	0	717.104
1	130340741	1	34	4	3247	1	1	0	4.65161	0	4	550	0	21.4286	21.4286	50	35.7143	0	250	150	1014.16
1	130340741	1	34	4	3247	2	1	0	4.65161	0	4	850	1.66667	35.7143	1.66667	3.33333	64.2857	1.66667	1.66667	150	1072.72
1	130340771	1	34	4	3248	1	1	0	4.65161	1	2	550	1.66667	50	150	1.66667	5	1.66667	150	250	1093.59
1	130340771	1	34	4	3248	2	1	0	4.65161	1	2	650	0	21.4286	150	0	250	0	35.7143	250	1279.19
1	130340781	1	34	4	3249	1	1	1	4.81862	0	4	650	0	0	0	0	21.4286	0	650	1.66667	1251.55
1	130340781	1	34	4	3249	2	1	1	4.81862	0	4	550	0	0	0	0	0	0	750	0	1220.5
1	130340791	1	34	4	3250	1	1	1	4.90623	0	2	750	0	10	0	0	21.4286	0	0	107.143	866.776
1	130340791	1	34	4	3250	2	1	1	4.90623	0	2	667.857	1.66667	5	1.66667	5	5	1.66667	16.6667	196.429	863.53
1	130340801	1	34	4	3251	1	1	0	4.88433	1	2	550	0	107.143	0	0	0	0	0	0	646.321
1	130340801	1	34	4	3251	2	1	0	4.88433	1	2	250	0	150	0	0	21.4286	0	0	0	403.921
1	130340811	1	34	4	3252	1	1	1	4.80219	1	4	550	0	1.66667	1.66667	0	0	0	250	0	776.648
1	130340811	1	34	4	3252	2	1	1	4.80219	1	4	650	0	0	0	0	0	16.6667	0	250	871.5
1	130340831	1	34	5	3234	1	1	1	5.0705	0	4	450	0	0	0	0	196.429	0	250	107.143	937.036
1	130340831	1	34	5	3234	2	1	1	5.0705	0	4	350	0	0	0	0	117.857	0	107.143	196.429	713.321
1	130340841	1	34	5	3235	1	1	1	5.0705	0	2	0	0	23.3333	64.2857	0	107.143	0	350	35.7143	522.448
1	130340841	1	34	5	3235	2	1	1	5.0705	0	2	550	0	107.143	107.143	5	35.7143	0	450	35.7143	1220.47
1	130340851	1	34	5	3236	1	1	1	5.05681	#NULL!	2	550	0	21.4286	3.33333	0	64.2857	250	0	0	847.279
1	130340851	1	34	5	3236	2	1	1	5.05681	#NULL!	2	21.4286	0	7.14286	7.14286	7.14286	7.14286	0	3.33333	7.14286	56.4871
1	130340861	1	34	5	3237	1	1	0	5.02943	0	2	0	1.66667	10	1.66667	1.66667	16.6667	1.66667	196.429	1.66667	207.049
1	130340861	1	34	5	3237	2	1	0	5.02943	0	2	250	0	107.143	8.33333	8.33333	150	0	196.429	16.6667	684.845
1	130340871	1	34	5	3238	1	1	0	5.02943	#NULL!	4	250	0	64.2857	0	0	0	0	275	64.2857	606.871
1	130340871	1	34	5	3238	2	1	0	5.02943	#NULL!	4	150	0	150	0	0	35.7143	5	350	150	758.086
1	110350011	1	35	1	3337	1	1	1	4.46817	1	2	432.143	0	50	0	0	39.2857	0	150	21.4286	663.9
1	110350011	1	35	1	3337	2	1	1	4.46817	1	2	450	0	150	64.2857	0	21.4286	0	150	21.4286	819.407
1	110350081	1	35	1	3338	1	1	0	3.92882	0	4	350	0	16.6667	0	0	107.143	0	36.6667	550	948.52
1	110350081	1	35	1	3338	2	1	0	3.92882	0	4	750	0	16.6667	0	35.7143	16.6667	16.6667	450	16.6667	1241.99
1	110350091	1	35	1	3339	1	1	1	3.60575	0	4	250	0	0	0	0	0	0	0	0	250
1	110350091	1	35	1	3339	2	1	1	3.60575	0	4	850	0	0	0	0	64.2857	0	0	21.4286	924.957
1	110350101	1	35	1	3340	1	1	1	4.36413	1	2	150	0	1.66667	0	0	150	1.66667	150	150	544.748
1	110350101	1	35	1	3340	2	1	1	4.36413	1	2	250	0	107.143	0	0	0	16.6667	350	107.143	762.436
1	110350141	1	35	2	3336	1	1	0	3.54825	1	2	196.429	1.66667	250	11.6667	1.66667	64.2857	21.4286	1.66667	10	521.494
1	110350141	1	35	2	3336	2	1	0	3.54825	1	2	450	0	64.2857	0	16.6667	16.6667	0	450	35.7143	969.231
1	110350231	1	35	3	3330	1	1	0	4.60507	0	2	750	1.66667	1.66667	21.4286	1.66667	107.143	1.66667	1.66667	1.66667	875.528
1	110350231	1	35	3	3330	2	1	0	4.60507	0	2	950	0	8.33333	150	0	35.7143	0	0	0	1137.78
1	110350241	1	35	3	3331	1	1	1	4.96099	1	4	350	0	35.7143	16.6667	0	35.7143	0	250	107.143	742.607
1	110350241	1	35	3	3331	2	1	1	4.96099	1	4	350	1.66667	16.6667	16.6667	1.66667	64.2857	0	250	10	673.616
1	110350271	1	35	3	3332	1	1	1	4.95551	0	4	350	0	16.6667	0	0	107.143	0	550	550	1407.44
1	110350271	1	35	3	3332	2	1	1	4.95551	0	4	550	0	23.3333	0	0	23.3333	23.3333	450	30	1039.18
1	110350281	1	35	3	3333	1	1	1	5.38535	#NULL!	2	1100	0	0	0	0	0	0	0	0	1100
1	110350281	1	35	3	3333	2	1	1	5.38535	#NULL!	2	850	0	0	0	0	21.4286	0	0	10	877.351
1	110350291	1	35	3	3334	1	1	1	4.96372	1	2	150	0	321.429	50	21.4286	0	0	150	0	641.507
1	110350291	1	35	3	3334	2	1	1	4.96372	1	2	550	10	150	50	10	35.7143	0	150	0	919.066
1	110350311	1	35	3	3335	1	1	1	4.99384	0	4	117.857	0	16.6667	0	5	5	0	350	0	454.61
1	110350311	1	35	3	3335	2	1	1	4.99384	0	4	196.429	0	107.143	0	5	5	0	350	0	614.52
1	110350381	1	35	4	3329	1	1	0	5.08145	0	4	350	10	150	16.6667	5	50	1.66667	250	64.2857	838.439
1	110350381	1	35	4	3329	2	1	0	5.08145	0	4	150	64.2857	64.2857	0	0	64.2857	0	117.857	21.4286	452.336
1	120360161	1	36	1	3384	1	1	1	4.01916	0	4	350	1.66667	5	1.66667	5	107.143	5	450	16.6667	878.037
1	120360161	1	36	1	3384	2	1	1	4.01916	0	4	196.429	1.66667	10	1.66667	1.66667	21.4286	1.66667	150	10	373.108
1	120360171	1	36	1	3385	1	1	0	3.95893	1	2	750	0	0	0	0	235.714	0	16.6667	16.6667	988.486
1	120360171	1	36	1	3385	2	1	0	3.95893	1	2	350	0	0	0	0	0	0	0	21.4286	367.743
1	120360221	1	36	1	3386	1	1	1	3.65777	1	4	350	0	0	3.33333	0	64.2857	0	250	21.4286	651.757
1	120360221	1	36	1	3386	2	1	1	3.65777	1	4	250	0	0	3.33333	0	21.4286	0	50	21.4286	334.814
1	120360281	1	36	2	3374	1	1	1	4.47639	1	4	150	0	64.2857	64.2857	0	0	0	196.429	196.429	609.686
1	120360281	1	36	2	3374	2	1	1	4.47639	1	4	21.4286	0	150	196.429	150	250	0	0	107.143	794.557
1	120360301	1	36	2	3375	1	1	0	5.08693	1	2	350	0	21.4286	0	64.2857	21.4286	0	450	16.6667	861.264
1	120360301	1	36	2	3375	2	1	0	5.08693	1	2	192.857	0	235.714	192.857	35.7143	35.7143	0	150	107.143	881.864
1	120360361	1	36	2	3376	1	1	0	5.14716	0	4	150	1.66667	64.2857	0	1.66667	3.33333	0	196.429	64.2857	442.734
1	120360361	1	36	2	3376	2	1	0	5.14716	0	4	450	0	64.2857	0	0	16.6667	0	64.2857	150	704.298
1	120360371	1	36	2	3377	1	1	0	4.92539	1	4	550	0	350	21.4286	16.6667	16.6667	0	150	16.6667	1063.33
1	120360371	1	36	2	3377	2	1	0	4.92539	1	4	550	0	64.2857	64.2857	0	35.7143	1.66667	350	1.66667	1018.95
1	210200141	2	0	0	12	1	2	1	4.52567	0	1	750	10	107.143	21.4286	5	16.6667	1.66667	10	15	919.589
1	210200141	2	0	0	12	2	2	1	4.52567	0	1	1100	1.66667	35.7143	1.66667	1.66667	10	0	3.33333	1.66667	1150.16
1	230010021	2	1	1	167	1	2	0	4.75565	0	1	250	107.143	64.2857	0	21.4286	0	0	64.2857	10	499.523
1	230010021	2	1	1	167	2	2	0	4.75565	0	1	450	0	0	0	64.2857	10	0	0	10	524.009
1	230010031	2	1	1	168	1	2	0	4.94182	0	1	750	10	5	1.66667	196.429	16.6667	35.7143	250	5	1213.32
1	230010031	2	1	1	168	2	2	0	4.94182	0	1	0	0	0	0	0	0	0	0	0	0
1	230010061	2	1	1	169	1	2	1	4.83504	0	1	750	117.857	16.6667	0	117.857	16.6667	0	117.857	0	1107.11
1	230010061	2	1	1	169	2	2	1	4.83504	0	1	950	117.857	16.6667	0	16.6667	16.6667	0	0	0	1112.29
1	230010071	2	1	1	170	1	2	0	4.564	0	1	550	196.429	3.33333	7.14286	64.2857	1.66667	3.33333	117.857	7.14286	928.791
1	230010071	2	1	1	170	2	2	0	4.564	0	1	950	196.429	7.14286	1.66667	35.7143	3.33333	10	107.143	21.4286	1311.07
1	230010081	2	1	1	171	1	2	0	5.24298	0	1	550	235.714	35.7143	1.66667	10	35.7143	1.66667	64.2857	16.6667	932.583
1	230010081	2	1	1	171	2	2	0	5.24298	0	1	750	432.143	192.857	16.6667	23.3333	192.857	192.857	23.3333	21.4286	1770.25
1	230010131	2	1	1	172	1	2	0	4.98836	1	1	950	150	5	0	10	35.7143	16.6667	196.429	5	1339.22
1	230010131	2	1	1	172	2	2	0	4.98836	1	1	750	107.143	1.66667	1.66667	192.857	21.4286	7.14286	7.14286	1.66667	1063.72
1	230010151	2	1	1	173	1	2	0	4.49008	0	1	650	7.14286	0	0	10	10	1.66667	10	1.66667	686.646
1	230010151	2	1	1	173	2	2	0	4.49008	0	1	750	10	5	1.66667	16.6667	10	1.66667	107.143	1.66667	888.384
1	230010161	2	1	1	174	1	2	1	4.76386	0	1	3.33333	107.143	1.66667	0	35.7143	0	16.6667	196.429	107.143	422.26
1	230010161	2	1	1	174	2	2	1	4.76386	0	1	550	30	10	10	35.7143	0	16.6667	250	150	992.631
1	230010261	2	1	2	130	1	2	1	4.78029	0	1	550	64.2857	0	0	0	16.6667	0	64.2857	10	694.806
1	230010261	2	1	2	130	2	2	1	4.78029	0	1	850	64.2857	0	0	0	16.6667	0	117.857	0	1034.42
1	230010281	2	1	2	131	1	2	0	4.37509	1	1	0	0	0	0	0	64.2857	0	107.143	0	153
1	230010281	2	1	2	131	2	2	0	4.37509	1	1	650	0	0	0	0	0	0	0	0	650
1	230010311	2	1	2	132	1	2	1	4.33676	#NULL!	1	350	0	0	0	1.66667	0	0	450	21.4286	771.516
1	230010311	2	1	2	132	2	2	1	4.33676	#NULL!	1	150	7.14286	35.7143	21.4286	3.33333	10	7.14286	250	250	659.018
1	230010331	2	1	2	133	1	2	0	5.05407	1	1	350	250	50	5	107.143	196.429	107.143	150	1.66667	1147.88
1	230010331	2	1	2	133	2	2	0	5.05407	1	1	550	107.143	64.2857	7.14286	275	107.143	64.2857	196.429	64.2857	1345.12
1	230010401	2	1	2	134	1	2	1	4.31211	#NULL!	1	350	0	275	0	0	0	0	0	0	597.225
1	230010401	2	1	2	134	2	2	1	4.31211	#NULL!	1	350	107.143	21.4286	0	3.33333	21.4286	0	150	150	756.618
1	230010421	2	1	2	135	1	2	1	5.1937	0	1	450	35.7143	0	0	1.66667	550	0	21.4286	0	995.809
1	230010421	2	1	2	135	2	2	1	5.1937	0	1	650	21.4286	23.3333	1.66667	0	0	0	107.143	0	789.82
1	230010441	2	1	2	136	1	2	0	4.37509	0	1	650	64.2857	1.66667	1.66667	21.4286	10	1.66667	3.33333	1.66667	751.023
1	230010441	2	1	2	136	2	2	0	4.37509	0	1	750	21.4286	1.66667	1.66667	3.33333	10	1.66667	10	10	805.072
1	230020041	2	2	1	236	1	1	0	4.79398	0	3	1100	8.33333	64.2857	30	5	30	5	5	5	1239.9
1	230020041	2	2	1	236	2	1	0	4.79398	0	3	1100	5	5	5	8.33333	235.714	0	0	11.6667	1341.25
1	230020061	2	2	1	238	1	1	1	4.65435	1	3	450	10	1.66667	0	150	5	0	64.2857	0	656.01
1	230020061	2	2	1	238	2	1	1	4.65435	1	3	550	21.4286	0	0	250	21.4286	0	196.429	0	987.086
1	230020071	2	2	1	239	1	1	0	5.12799	0	5	350	150	1.66667	5	50	192.857	0	250	16.6667	959.441
1	230020071	2	2	1	239	2	1	0	5.12799	0	5	450	16.6667	1.66667	1.66667	107.143	1.66667	3.33333	192.857	21.4286	759.053
1	230020091	2	2	1	240	1	1	1	4.64339	0	3	550	21.4286	3.33333	1.66667	1.66667	3.33333	5	64.2857	10	650.595
1	230020091	2	2	1	240	2	1	1	4.64339	0	3	0	3.33333	1.66667	1.66667	1.66667	3.33333	1.66667	117.857	64.2857	170.961
1	230020101	2	2	1	241	1	1	1	5.08145	1	5	150	21.4286	64.2857	10	1.66667	3.33333	0	21.4286	21.4286	280.44
1	230020101	2	2	1	241	2	1	1	5.08145	1	5	250	64.2857	10	5	5	10	0	117.857	10	455.126
1	230020111	2	2	1	242	1	1	1	4.57769	#NULL!	5	150	107.143	0	0	7.14286	16.6667	0	35.7143	21.4286	327.855
1	230020111	2	2	1	242	2	1	1	4.57769	#NULL!	5	450	21.4286	3.33333	1.66667	10	10	1.66667	21.4286	1.66667	515.781
1	230020151	2	2	1	243	1	1	1	4.87337	1	3	550	16.6667	16.6667	0	0	16.6667	8.33333	196.429	196.429	941.967
1	230020151	2	2	1	243	2	1	1	4.87337	1	3	650	0	16.6667	16.6667	0	16.6667	16.6667	250	16.6667	948.117
1	230020201	2	2	1	246	1	1	0	5.07324	0	3	750	7.14286	0	0	21.4286	7.14286	0	250	0	1005.94
1	230020201	2	2	1	246	2	1	0	5.07324	0	3	550	64.2857	0	0	21.4286	21.4286	0	196.429	35.7143	857.414
1	230020211	2	2	1	247	1	1	0	4.35318	0	3	550	196.429	0	0	107.143	150	150	432.143	0	1491.28
1	230020211	2	2	1	247	2	1	0	4.35318	0	3	550	107.143	0	0	3.33333	64.2857	10	250	0	949.397
1	230020231	2	2	1	249	1	1	1	5.06502	0	3	750	35.7143	321.429	1.66667	278.571	432.143	35.7143	450	150	2264.73
1	230020231	2	2	1	249	2	1	1	5.06502	0	3	250	3.33333	3.33333	1.66667	1.66667	10	1.66667	21.4286	21.4286	306.7
1	230020261	2	2	1	251	1	1	1	5.22656	1	3	750	10	1.66667	1.66667	10	16.6667	1.66667	64.2857	3.33333	848.493
1	230020261	2	2	1	251	2	1	1	5.22656	1	3	750	64.2857	0	0	21.4286	21.4286	0	64.2857	5	913.847
1	230020291	2	2	2	203	1	1	0	5.13347	0	3	950	107.143	21.4286	1.66667	16.6667	107.143	1.66667	275	64.2857	1488.57
1	230020291	2	2	2	203	2	1	0	5.13347	0	3	950	107.143	21.4286	5	35.7143	107.143	1.66667	107.143	107.143	1394.13
1	230020311	2	2	2	205	1	1	1	4.52567	0	5	250	107.143	7.14286	1.66667	1.66667	3.33333	1.66667	21.4286	10	398.434
1	230020311	2	2	2	205	2	1	1	4.52567	0	5	950	278.571	21.4286	21.4286	192.857	107.143	0	0	0	1534.61
1	230020351	2	2	2	207	1	1	0	4.95825	#NULL!	5	550	192.857	0	0	192.857	192.857	0	550	0	1576.49
1	230020351	2	2	2	207	2	1	0	4.95825	#NULL!	5	650	250	0	0	196.429	0	21.4286	250	16.6667	1329.34
1	230020421	2	2	2	209	1	1	0	4.9117	0	5	750	0	7.14286	3.33333	35.7143	3.33333	0	0	0	794.26
1	230020421	2	2	2	209	2	1	0	4.9117	0	5	450	21.4286	21.4286	16.6667	64.2857	10	21.4286	107.143	21.4286	705.071
1	230020441	2	2	2	210	1	1	1	5.11431	0	3	350	10	1.66667	1.66667	1.66667	10	1.66667	64.2857	1.66667	433.813
1	230020441	2	2	2	210	2	1	1	5.11431	0	3	650	21.4286	5	0	0	10	0	64.2857	0	742.274
1	230020451	2	2	2	211	1	1	1	4.55031	0	3	950	0	0	0	35.7143	16.6667	16.6667	350	250	1530.8
1	230020451	2	2	2	211	2	1	1	4.55031	0	3	750	0	0	0	107.143	0	107.143	150	16.6667	1085.83
1	230020471	2	2	2	212	1	1	1	4.55031	0	5	450	1.66667	10	1.66667	1.66667	10	1.66667	150	1.66667	609.608
1	230020471	2	2	2	212	2	1	1	4.55031	0	5	850	64.2857	107.143	0	16.6667	16.6667	0	107.143	35.7143	1165.47
1	230020511	2	2	2	214	1	1	0	4.61602	0	5	750	250	10	0	250	3.33333	1.66667	10	1.66667	1244.48
1	230020511	2	2	2	214	2	1	0	4.61602	0	5	450	196.429	1.66667	1.66667	107.143	1.66667	1.66667	16.6667	1.66667	763.308
1	230020531	2	2	2	215	1	1	0	4.92539	0	3	650	10	1.66667	1.66667	10	64.2857	10	10	1.66667	748.213
1	230020531	2	2	2	215	2	1	0	4.92539	0	3	850	10	10	1.66667	10	21.4286	10	21.4286	1.66667	927.779
1	230020541	2	2	2	216	1	1	1	4.52019	0	5	1100	250	107.143	0	107.143	150	0	0	0	1674.29
1	230020541	2	2	2	216	2	1	1	4.52019	0	5	1100	196.429	35.7143	0	107.143	35.7143	0	250	107.143	1767.05
1	220030031	2	3	1	351	1	1	0	5.25667	0	4	950	0	0	0	0	0	0	107.143	10	1054.07
1	220030031	2	3	1	351	2	1	0	5.25667	0	4	950	0	1.66667	1.66667	64.2857	10	1.66667	39.2857	1.66667	1056.83
1	220030071	2	3	1	354	1	1	0	4.47091	1	4	650	10	1.66667	1.66667	1.66667	10	1.66667	10	1.66667	685.282
1	220030071	2	3	1	354	2	1	0	4.47091	1	4	450	5	1.66667	1.66667	10	16.6667	1.66667	5	10	496.017
1	220030141	2	3	1	360	1	1	0	4.44627	0	4	750	35.7143	0	0	35.7143	107.143	0	150	5	1050.85
1	220030141	2	3	1	360	2	1	0	4.44627	0	4	750	107.143	0	0	107.143	16.6667	0	117.857	0	1071.95
1	220030291	2	3	2	313	1	1	1	4.74743	1	4	250	5	450	64.2857	35.7143	107.143	16.6667	150	150	1122.92
1	220030291	2	3	2	313	2	1	1	4.74743	1	4	0	0	0	0	0	0	0	0	0	0
1	220040091	2	4	1	460	1	2	1	4.69815	#NULL!	1	950	64.2857	21.4286	10	107.143	10	10	64.2857	10	1221.45
1	220040091	2	4	1	460	2	2	1	4.69815	#NULL!	1	450	64.2857	10	10	107.143	10	35.7143	107.143	35.7143	793.154
1	220040111	2	4	1	461	1	2	0	4.35318	0	1	750	10	0	0	10	35.7143	0	21.4286	0	819.773
1	220040111	2	4	1	461	2	2	0	4.35318	0	1	950	21.4286	0	0	0	16.6667	1.66667	3.33333	1.66667	992.05
1	220040141	2	4	1	462	1	2	0	4.72279	0	1	1100	1.66667	1.66667	10	1.66667	21.4286	1.66667	64.2857	1.66667	1193.91
1	220040141	2	4	1	462	2	2	0	4.72279	0	1	1100	21.4286	1.66667	1.66667	10	21.4286	21.4286	64.2857	21.4286	1246.32
1	220040151	2	4	1	463	1	2	0	4.89528	#NULL!	1	650	64.2857	1.66667	1.66667	1.66667	117.857	1.66667	117.857	1.66667	931.93
1	220040151	2	4	1	463	2	2	0	4.89528	#NULL!	1	550	107.143	1.66667	1.66667	8.33333	196.429	1.66667	350	10	1165
1	220040211	2	4	1	464	1	2	0	4.69541	1	1	750	275	1.66667	107.143	150	192.857	1.66667	50	16.6667	1496.49
1	220040211	2	4	1	464	2	2	0	4.69541	1	1	950	16.6667	0	0	16.6667	353.571	1.66667	35.7143	35.7143	1359.01
1	220040241	2	4	1	465	1	2	0	4.42984	1	1	950	3.33333	1.66667	1.66667	64.2857	64.2857	1.66667	64.2857	64.2857	1182.67
1	220040241	2	4	1	465	2	2	0	4.42984	1	1	1100	117.857	0	0	0	0	0	39.2857	0	1252.86
1	220040261	2	4	1	466	1	2	0	4.9692	#NULL!	1	950	21.4286	35.7143	1.66667	1.66667	15	1.66667	864.286	1.66667	1795.49
1	220040261	2	4	1	466	2	2	0	4.9692	#NULL!	1	550	107.143	64.2857	64.2857	16.6667	250	16.6667	196.429	107.143	1294.53
1	220040291	2	4	2	417	1	2	0	4.73101	0	1	192.857	21.4286	1.66667	1.66667	50	50	10	107.143	21.4286	428.341
1	220040291	2	4	2	417	2	2	0	4.73101	0	1	1100	235.714	1.66667	1.66667	30	35.7143	36.6667	50	23.3333	1492.85
1	220040301	2	4	2	418	1	2	1	4.75565	1	1	550	0	7.14286	1.66667	1.66667	7.14286	1.66667	16.6667	1.66667	583.632
1	220040301	2	4	2	418	2	2	1	4.75565	1	1	550	1.66667	1.66667	1.66667	10	10	1.66667	3.33333	3.33333	579.743
1	220040311	2	4	2	419	1	2	1	4.7885	0	1	650	21.4286	21.4286	3.33333	21.4286	64.2857	35.7143	35.7143	35.7143	862.7
1	220040311	2	4	2	419	2	2	1	4.7885	0	1	650	35.7143	21.4286	35.7143	35.7143	107.143	16.6667	107.143	21.4286	995.257
1	220040321	2	4	2	420	1	2	0	5.09788	1	1	950	10	23.3333	1.66667	196.429	196.429	0	250	1.66667	1555.96
1	220040321	2	4	2	420	2	2	0	5.09788	1	1	950	1.66667	1.66667	1.66667	35.7143	250	1.66667	107.143	1.66667	1307.5
1	220040381	2	4	2	421	1	2	1	5.25667	1	1	850	3.33333	3.33333	35.7143	3.33333	3.33333	3.33333	650	1.66667	1482.98
1	220040381	2	4	2	421	2	2	1	5.25667	1	1	0	0	0	0	0	0	0	0	0	0
1	220040411	2	4	2	422	1	2	1	4.39151	1	1	1100	21.4286	35.7143	64.2857	0	250	35.7143	107.143	107.143	1655.23
1	220040411	2	4	2	422	2	2	1	4.39151	1	1	21.4286	64.2857	3.33333	3.33333	1.66667	107.143	3.33333	35.7143	21.4286	241.349
1	220040431	2	4	2	423	1	2	0	5.04312	0	1	850	350	0	0	107.143	10	1.66667	10	1.66667	1315.03
1	220040431	2	4	2	423	2	2	0	5.04312	0	1	1100	196.429	0	0	35.7143	5	5	107.143	16.6667	1446.19
1	220040451	2	4	2	424	1	2	0	5.1499	1	1	550	64.2857	10	50	64.2857	64.2857	10	117.857	1.66667	902.199
1	220040451	2	4	2	424	2	2	0	5.1499	1	1	950	64.2857	64.2857	1.66667	64.2857	64.2857	10	150	10	1338.79
1	220040521	2	4	2	425	1	2	0	4.78303	0	1	350	107.143	1.66667	1.66667	16.6667	150	1.66667	107.143	16.6667	719.453
1	220040521	2	4	2	425	2	2	0	4.78303	0	1	250	107.143	5	5	35.7143	150	5	64.2857	35.7143	622.945
1	220050061	2	5	1	597	1	1	1	4.67351	1	5	650	1.66667	35.7143	10	10	10	1.66667	107.143	107.143	897.362
1	220050061	2	5	1	597	2	1	1	4.67351	1	5	550	107.143	35.7143	35.7143	16.6667	16.6667	10	107.143	0	858.552
1	220050091	2	5	1	598	1	1	0	5.24572	1	5	550	10	3.33333	1.66667	0	10	1.66667	117.857	21.4286	698.094
1	220050091	2	5	1	598	2	1	0	5.24572	1	5	450	7.14286	3.33333	1.66667	21.4286	10	35.7143	196.429	107.143	785.018
1	220050111	2	5	1	599	1	1	0	5.01574	1	5	850	5	5	5	16.6667	10	5	107.143	107.143	1076.92
1	220050111	2	5	1	599	2	1	0	5.01574	1	5	650	16.6667	16.6667	1.66667	16.6667	23.3333	8.33333	107.143	35.7143	851.39
1	220050141	2	5	1	600	1	1	1	4.38056	#NULL!	3	0	0	0	0	0	0	0	0	0	0
1	220050141	2	5	1	600	2	1	1	4.38056	#NULL!	3	107.143	117.857	21.4286	10	16.6667	150	16.6667	192.857	16.6667	602.994
1	230060071	2	6	1	726	1	1	0	4.4052	0	2	450	64.2857	15	1.66667	1.66667	117.857	5	21.4286	10	667.51
1	230060071	2	6	1	726	2	1	0	4.4052	0	2	950	21.4286	3.33333	1.66667	10	35.7143	1.66667	0	3.33333	1020.89
1	230060081	2	6	1	727	1	1	0	4.99658	1	4	650	150	50	5	192.857	35.7143	30	107.143	107.143	1262.62
1	230060081	2	6	1	727	2	1	0	4.99658	1	4	750	196.429	0	0	107.143	275	0	0	0	1285.7
1	230060161	2	6	1	730	1	1	0	4.61875	0	4	850	16.6667	0	0	35.7143	35.7143	16.6667	196.429	0	1120.11
1	230060161	2	6	1	730	2	1	0	4.61875	0	4	750	5	0	0	35.7143	35.7143	16.6667	107.143	8.33333	935.538
1	230060171	2	6	1	731	1	1	1	5.29227	1	2	950	64.2857	1.66667	1.66667	1.66667	1.66667	1.66667	1.66667	1.66667	1024.65
1	230060171	2	6	1	731	2	1	1	5.29227	1	2	1100	3.33333	1.66667	1.66667	1.66667	10	10	3.33333	1.66667	1129.91
1	230060191	2	6	1	733	1	1	1	5.31143	0	4	350	16.6667	0	0	10	5	0	107.143	10	484.006
1	230060191	2	6	1	733	2	1	1	5.31143	0	4	650	35.7143	1.66667	1.66667	107.143	35.7143	16.6667	150	1.66667	965.307
1	230060291	2	6	2	667	1	1	0	4.88706	0	2	350	35.7143	350	0	0	196.429	0	21.4286	21.4286	912.05
1	230060291	2	6	2	667	2	1	0	4.88706	0	2	650	117.857	150	3.33333	10	117.857	5	10	10	1041.19
1	230060311	2	6	2	669	1	1	0	4.65982	0	4	1100	196.429	1.66667	1.66667	21.4286	107.143	5	1.66667	10	1427.8
1	230060311	2	6	2	669	2	1	0	4.65982	0	4	1100	196.429	16.6667	1.66667	64.2857	35.7143	1.66667	35.7143	5	1439
1	230060401	2	6	2	674	1	1	1	4.69541	#NULL!	2	150	21.4286	1.66667	1.66667	3.33333	64.2857	10	35.7143	21.4286	293.088
1	230060401	2	6	2	674	2	1	1	4.69541	#NULL!	2	150	64.2857	1.66667	1.66667	35.7143	0	10	21.4286	10	285.078
1	230060441	2	6	2	675	1	1	1	4.89802	#NULL!	4	650	0	5	0	0	10	1.66667	64.2857	64.2857	775.545
1	230060441	2	6	2	675	2	1	1	4.89802	#NULL!	4	550	3.33333	0	0	7.14286	10	0	250	196.429	954.687
1	230060481	2	6	2	677	1	1	1	4.33949	0	4	650	21.4286	0	0	64.2857	589.286	1.66667	21.4286	0	1273.31
1	230060481	2	6	2	677	2	1	1	4.33949	0	4	650	35.7143	1.66667	1.66667	192.857	35.7143	8.33333	16.6667	16.6667	927.048
1	230060511	2	6	2	680	1	1	1	5.15537	0	2	850	21.4286	196.429	3.33333	117.857	64.2857	3.33333	39.2857	3.33333	1253.48
1	230060511	2	6	2	680	2	1	1	5.15537	0	2	1100	107.143	353.571	1.66667	250	235.714	35.7143	150	1.66667	2123.88
1	230070131	2	7	1	845	1	1	1	4.57495	0	3	750	10	0	0	21.4286	10	0	150	10	930.213
1	230070131	2	7	1	845	2	1	1	4.57495	0	3	450	10	0	0	16.6667	10	0	16.6667	0	498.523
1	230070151	2	7	1	846	1	1	0	4.69541	#NULL!	3	850	35.7143	30	1.66667	36.6667	407.143	1.66667	0	43.3333	1346.4
1	230070151	2	7	1	846	2	1	0	4.69541	#NULL!	3	35.7143	64.2857	1.66667	0	350	10	0	64.2857	0	477.205
1	230070171	2	7	1	847	1	1	0	5.29774	1	3	950	107.143	0	0	21.4286	16.6667	0	196.429	0	1266.42
1	230070171	2	7	1	847	2	1	0	5.29774	1	3	1100	16.6667	1.66667	1.66667	1.66667	1.66667	1.66667	250	1.66667	1349.09
1	230070211	2	7	1	850	1	1	1	4.4271	1	5	850	250	0	0	196.429	16.6667	0	21.4286	0	1307.38
1	230070211	2	7	1	850	2	1	1	4.4271	1	5	950	196.429	7.14286	1.66667	196.429	10	1.66667	250	64.2857	1615.03
1	230070261	2	7	1	852	1	1	0	5.16085	1	3	950	196.429	16.6667	0	35.7143	8.33333	0	64.2857	5	1261.82
1	230070261	2	7	1	852	2	1	0	5.16085	1	3	850	64.2857	5	0	16.6667	10	0	21.4286	0	961.507
1	230070281	2	7	1	854	1	1	1	5.16085	1	5	1100	64.2857	35.7143	0	16.6667	196.429	16.6667	21.4286	21.4286	1437.28
1	230070281	2	7	1	854	2	1	1	5.16085	1	5	1100	107.143	107.143	3.33333	10	107.143	10	450	16.6667	1835.65
1	230070291	2	7	1	855	1	1	0	4.39151	0	3	450	150	16.6667	0	10	250	0	196.429	0	1021.78
1	230070291	2	7	1	855	2	1	0	4.39151	0	3	650	150	0	0	64.2857	35.7143	16.6667	250	1.66667	1127.84
1	230070311	2	7	1	856	1	1	0	4.50376	0	3	1100	64.2857	1.66667	1.66667	64.2857	10	1.66667	0	0	1234.55
1	230070311	2	7	1	856	2	1	0	4.50376	0	3	950	64.2857	3.33333	3.33333	10	10	3.33333	64.2857	10	1106.91
1	230070411	2	7	2	797	1	1	1	4.78029	0	3	1100	1.66667	0	0	0	0	0	3.33333	1.66667	1106.03
1	230070411	2	7	2	797	2	1	1	4.78029	0	3	450	0	1.66667	1.66667	16.6667	107.143	16.6667	117.857	117.857	780.689
1	230080041	2	8	1	958	1	1	0	4.43258	1	5	550	10	196.429	0	10	21.4286	10	64.2857	10	838.942
1	230080041	2	8	1	958	2	1	0	4.43258	1	5	750	150	0	0	16.6667	0	0	35.7143	1.66667	947.892
1	230080061	2	8	1	959	1	1	1	4.97194	0	5	350	5	10	0	16.6667	10	5	64.2857	21.4286	467.183
1	230080061	2	8	1	959	2	1	1	4.97194	0	5	350	107.143	35.7143	1.66667	107.143	64.2857	35.7143	196.429	21.4286	867.143
1	230080091	2	8	1	961	1	1	0	4.87337	#NULL!	5	950	21.4286	64.2857	1.66667	64.2857	432.143	21.4286	21.4286	7.14286	1516
1	230080091	2	8	1	961	2	1	0	4.87337	#NULL!	5	1100	64.2857	21.4286	0	150	250	10	107.143	10	1651.35
1	230080211	2	8	1	963	1	1	1	4.61875	0	5	650	107.143	21.4286	5	21.4286	196.429	35.7143	64.2857	35.7143	1093.13
1	230080211	2	8	1	963	2	1	1	4.61875	0	5	750	1.66667	3.33333	1.66667	1.66667	1.66667	1.66667	64.2857	1.66667	819.57
1	230080241	2	8	1	964	1	1	0	5.11431	0	5	650	3.33333	1.66667	1.66667	16.6667	1.66667	1.66667	107.143	16.6667	783.731
1	230080241	2	8	1	964	2	1	0	5.11431	0	5	650	35.7143	3.33333	1.66667	250	1.66667	1.66667	196.429	250	1296.87
1	230080271	2	8	2	913	1	1	0	4.51198	0	5	550	107.143	107.143	0	1.66667	1.66667	16.6667	250	1.66667	995.694
1	230080271	2	8	2	913	2	1	0	4.51198	0	5	0	0	0	0	0	0	0	0	0	0
1	230080281	2	8	2	914	1	1	0	4.44627	1	5	850	64.2857	3.33333	1.66667	64.2857	21.4286	3.33333	64.2857	1.66667	1056.52
1	230080281	2	8	2	914	2	1	0	4.44627	1	5	550	64.2857	1.66667	1.66667	21.4286	7.14286	1.66667	150	1.66667	779.6
1	230080291	2	8	2	915	1	1	1	4.55852	#NULL!	5	450	107.143	21.4286	0	21.4286	250	1.66667	150	3.33333	956.053
1	230080291	2	8	2	915	2	1	1	4.55852	#NULL!	5	850	107.143	0	0	21.4286	10	107.143	250	8.33333	1308.49
1	230080311	2	8	2	916	1	1	1	4.70089	0	5	1100	107.143	0	0	250	3.33333	0	107.143	3.33333	1529.55
1	230080311	2	8	2	916	2	1	1	4.70089	0	5	1100	107.143	1.66667	1.66667	250	10	1.66667	64.2857	1.66667	1500.39
1	230080331	2	8	2	917	1	1	1	5.2293	0	3	450	1.66667	10	1.66667	1.66667	550	1.66667	350	250	1474.63
1	230080331	2	8	2	917	2	1	1	5.2293	0	3	250	1.66667	250	1.66667	1.66667	250	1.66667	50	50	789.588
1	230080341	2	8	2	918	1	1	0	4.4846	1	3	0	10	0	0	0	0	10	117.857	0	124.054
1	230080341	2	8	2	918	2	1	0	4.4846	1	3	550	21.4286	0	0	0	0	0	10	1.66667	581.727
1	230080351	2	8	2	919	1	1	1	4.57769	1	5	1100	21.4286	16.6667	16.6667	23.3333	150	5	1.66667	5	1317
1	230080351	2	8	2	919	2	1	1	4.57769	1	5	950	64.2857	21.4286	1.66667	64.2857	21.4286	1.66667	1.66667	1.66667	1115.36
1	230080371	2	8	2	920	1	1	0	4.35044	1	3	350	107.143	1.66667	1.66667	10	10	1.66667	1.66667	1.66667	482.244
1	230080371	2	8	2	920	2	1	0	4.35044	1	3	450	64.2857	1.66667	1.66667	64.2857	3.33333	1.66667	1.66667	1.66667	581.485
1	230080391	2	8	2	922	1	1	0	4.8679	1	5	3.33333	250	21.4286	21.4286	10	107.143	1.66667	107.143	10	503.275
1	230080391	2	8	2	922	2	1	0	4.8679	1	5	39.2857	107.143	21.4286	0	35.7143	35.7143	0	64.2857	21.4286	304.157
1	230080411	2	8	2	924	1	1	1	4.87885	1	5	450	5	1.66667	1.66667	10	21.4286	1.66667	64.2857	1.66667	546.356
1	230080411	2	8	2	924	2	1	1	4.87885	1	5	650	35.7143	5	5	10	16.6667	16.6667	16.6667	16.6667	761.997
1	230080431	2	8	2	926	1	1	0	5.15264	1	5	350	16.6667	30	0	0	107.143	50	107.143	0	628.263
1	230080431	2	8	2	926	2	1	0	5.15264	1	5	350	10	5	0	0	64.2857	16.6667	250	5	663.839
1	230080461	2	8	2	928	1	1	1	4.68172	1	3	450	64.2857	3.33333	1.66667	21.4286	21.4286	10	64.2857	21.4286	640.797
1	230080461	2	8	2	928	2	1	1	4.68172	1	3	350	64.2857	7.14286	1.66667	3.33333	3.33333	10	64.2857	10	502.658
1	230100261	2	10	2	1132	1	2	0	4.85421	0	1	950	350	0	0	150	150	0	107.143	16.6667	1675.34
1	230100261	2	10	2	1132	2	2	0	4.85421	0	1	450	150	21.4286	0	250	5	1.66667	64.2857	10	911.766
1	230100271	2	10	2	1133	1	2	0	4.53662	0	1	650	107.143	1.66667	1.66667	16.6667	196.429	1.66667	35.7143	1.66667	984.497
1	230100271	2	10	2	1133	2	2	0	4.53662	0	1	950	196.429	117.857	0	10	16.6667	1.66667	64.2857	0	1334.78
1	230100291	2	10	2	1134	1	2	0	4.76386	1	1	0	0	0	0	0	0	0	0	0	0
1	230100291	2	10	2	1134	2	2	0	4.76386	1	1	550	21.4286	1.66667	1.66667	35.7143	250	21.4286	21.4286	21.4286	884.17
1	230100311	2	10	2	1135	1	2	1	4.63792	0	1	1100	350	1.66667	1.66667	7.14286	3.33333	1.66667	3.33333	0	1466.51
1	230100311	2	10	2	1135	2	2	1	4.63792	0	1	950	350	0	0	107.143	10	0	10	0	1412.2
1	230100331	2	10	2	1136	1	2	1	4.73101	0	1	950	10	5	1.66667	1.66667	10	1.66667	235.714	1.66667	1190.07
1	230100331	2	10	2	1136	2	2	1	4.73101	0	1	750	1.66667	3.33333	0	5	150	0	5	1.66667	898.432
1	230100341	2	10	2	1137	1	2	1	4.3833	1	1	650	21.4286	1.66667	1.66667	10	5	1.66667	35.7143	21.4286	738.967
1	230100341	2	10	2	1137	2	2	1	4.3833	1	1	1100	5	0	0	0	107.143	0	64.2857	64.2857	1311.05
1	230100361	2	10	2	1138	1	2	1	5.07598	0	1	550	0	0	0	64.2857	1.66667	3.33333	3.33333	3.33333	616.952
1	230100361	2	10	2	1138	2	2	1	5.07598	0	1	550	64.2857	0	0	35.7143	0	5	10	0	659.083
1	230100381	2	10	2	1139	1	2	1	5.16906	0	1	350	107.143	1.66667	1.66667	107.143	5	1.66667	107.143	16.6667	670.384
1	230100381	2	10	2	1139	2	2	1	5.16906	0	1	1100	107.143	16.6667	10	107.143	10	8.33333	107.143	107.143	1527.28
1	230100451	2	10	3	1110	1	2	1	4.79398	0	1	1100	353.571	0	0	150	150	16.6667	107.143	5	1833.74
1	230100451	2	10	3	1110	2	2	1	4.79398	0	1	1100	23.3333	0	0	10	107.143	5	10	5	1244.94
1	230100461	2	10	3	1111	1	2	1	5.16085	1	1	0	0	0	0	0	0	0	0	0	0
1	230100461	2	10	3	1111	2	2	1	5.16085	1	1	0	0	0	0	0	0	0	0	0	0
1	230100471	2	10	3	1112	1	2	1	4.54483	1	1	350	64.2857	3.33333	1.66667	21.4286	64.2857	1.66667	64.2857	64.2857	607.175
1	230100471	2	10	3	1112	2	2	1	4.54483	1	1	650	21.4286	10	10	10	196.429	10	107.143	35.7143	1008.02
1	230100501	2	10	3	1113	1	2	0	4.43532	0	1	950	16.6667	1.66667	1.66667	1.66667	16.6667	50	50	64.2857	1127.53
1	230100501	2	10	3	1113	2	2	0	4.43532	0	1	450	107.143	5	0	5	10	0	150	10	717.231
1	230100511	2	10	3	1114	1	2	0	4.72005	0	1	950	16.6667	0	0	0	196.429	0	16.6667	10	1164.65
1	230100511	2	10	3	1114	2	2	0	4.72005	0	1	950	107.143	5	107.143	196.429	21.4286	0	0	0	1360.32
1	230100541	2	10	3	1115	1	2	0	4.53662	0	1	650	353.571	0	0	107.143	107.143	35.7143	350	107.143	1625.98
1	230100541	2	10	3	1115	2	2	0	4.53662	0	1	750	275	1.66667	1.66667	64.2857	107.143	107.143	250	35.7143	1526.34
1	230100581	2	10	3	1116	1	2	0	4.70637	1	1	350	107.143	0	0	7.14286	150	107.143	150	7.14286	830.079
1	230100581	2	10	3	1116	2	2	0	4.70637	1	1	0	0	0	0	0	0	0	0	0	0
1	230100621	2	10	3	1117	1	2	0	4.69268	0	1	750	196.429	107.143	1.66667	196.429	107.143	64.2857	250	107.143	1681.35
1	230100621	2	10	3	1117	2	2	0	4.69268	0	1	850	250	1.66667	1.66667	192.857	107.143	64.2857	196.429	10	1608.56
1	230100631	2	10	3	1118	1	2	0	4.40794	0	1	850	21.4286	35.7143	5	16.6667	8.33333	8.33333	10	1.66667	948.184
1	230100631	2	10	3	1118	2	2	0	4.40794	0	1	550	7.14286	1.66667	1.66667	7.14286	1.66667	1.66667	1.66667	1.66667	572.402
1	230110031	2	11	1	1276	1	2	1	4.52293	1	1	750	107.143	30	0	21.4286	64.2857	10	107.143	0	1064.65
1	230110031	2	11	1	1276	2	2	1	4.52293	1	1	850	107.143	8.33333	5	35.7143	35.7143	16.6667	107.143	0	1143.12
1	230110041	2	11	1	1277	1	2	0	5.03217	1	1	750	0	10	1.66667	21.4286	64.2857	10	150	35.7143	1009.17
1	230110041	2	11	1	1277	2	2	0	5.03217	1	1	850	64.2857	21.4286	1.66667	50	64.2857	16.6667	250	21.4286	1292.29
1	230110091	2	11	1	1278	1	2	1	4.53662	0	1	750	16.6667	30	0	50	196.429	0	196.429	107.143	1276.96
1	230110091	2	11	1	1278	2	2	1	4.53662	0	1	650	3.33333	3.33333	1.66667	35.7143	21.4286	10	150	64.2857	904.648
1	230110101	2	11	1	1279	1	2	1	4.42437	0	1	750	0	7.14286	1.66667	1.66667	3.33333	1.66667	1.66667	1.66667	766.831
1	230110101	2	11	1	1279	2	2	1	4.42437	0	1	650	64.2857	16.6667	1.66667	5	16.6667	16.6667	107.143	1.66667	861.774
1	230110111	2	11	1	1280	1	2	1	4.84052	0	1	650	64.2857	35.7143	0	64.2857	196.429	0	0	3.33333	980.739
1	230110111	2	11	1	1280	2	2	1	4.84052	0	1	650	107.143	107.143	3.33333	64.2857	107.143	1.66667	21.4286	10	1037.73
1	230110121	2	11	1	1281	1	2	1	4.71458	1	1	350	107.143	196.429	0	196.429	196.429	0	107.143	0	1077.88
1	230110121	2	11	1	1281	2	2	1	4.71458	1	1	650	150	1.66667	1.66667	64.2857	107.143	1.66667	64.2857	3.33333	1016.87
1	230110141	2	11	1	1282	1	2	1	4.46817	1	1	450	117.857	0	0	0	107.143	3.33333	35.7143	35.7143	727.496
1	230110141	2	11	1	1282	2	2	1	4.46817	1	1	450	107.143	15	1.66667	8.33333	107.143	1.66667	35.7143	35.7143	737.845
1	230110151	2	11	1	1283	1	2	1	4.60507	0	1	1100	0	8.33333	0	0	16.6667	16.6667	107.143	107.143	1321.32
1	230110151	2	11	1	1283	2	2	1	4.60507	0	1	1100	1.66667	3.33333	1.66667	1.66667	1.66667	16.6667	21.4286	10	1151.21
1	230110181	2	11	1	1284	1	2	1	5.08966	0	1	550	16.6667	0	0	23.3333	107.143	16.6667	64.2857	16.6667	768.405
1	230110181	2	11	1	1284	2	2	1	5.08966	0	1	250	64.2857	1.66667	1.66667	3.33333	117.857	1.66667	196.429	64.2857	655.495
1	230110191	2	11	1	1285	1	2	1	5.19644	1	1	550	35.7143	107.143	3.33333	16.6667	275	1.66667	35.7143	5	982.302
1	230110191	2	11	1	1285	2	2	1	5.19644	1	1	450	196.429	16.6667	1.66667	16.6667	107.143	1.66667	21.4286	10	801.843
1	230110201	2	11	1	1286	1	2	1	4.72827	0	1	950	364.286	1.66667	1.66667	746.429	21.4286	1.66667	1.66667	1.66667	2000.3
1	230110201	2	11	1	1286	2	2	1	4.72827	0	1	950	21.4286	5	5	107.143	5	5	21.4286	5	1107.66
1	230110211	2	11	1	1287	1	2	0	4.82683	0	1	650	150	1.66667	0	107.143	16.6667	16.6667	107.143	35.7143	1050.75
1	230110211	2	11	1	1287	2	2	0	4.82683	0	1	350	0	5	1.66667	16.6667	107.143	21.4286	0	35.7143	514.45
1	230110221	2	11	1	1288	1	2	1	5.08419	0	1	550	16.6667	0	0	10	35.7143	0	150	0	741.376
1	230110221	2	11	1	1288	2	2	1	5.08419	0	1	450	16.6667	35.7143	5	10	16.6667	8.33333	64.2857	5	596.242
1	230110231	2	11	1	1289	1	2	0	5.34702	0	1	950	107.143	5	1.66667	1.66667	10	0	107.143	107.143	1258.05
1	230110231	2	11	1	1289	2	2	0	5.34702	0	1	1100	107.143	35.7143	5	5	16.6667	1.66667	107.143	1.66667	1361.96
1	230110241	2	11	1	1290	1	2	0	4.97741	1	1	450	250	64.2857	1.66667	7.14286	107.143	1.66667	10	1.66667	872.634
1	230110241	2	11	1	1290	2	2	0	4.97741	1	1	650	407.143	150	1.66667	50	407.143	1.66667	50	3.33333	1648.7
1	230110251	2	11	1	1291	1	2	0	4.95277	1	1	350	107.143	5	8.33333	0	107.143	0	0	0	565.138
1	230110251	2	11	1	1291	2	2	0	4.95277	1	1	450	107.143	1.66667	1.66667	5	64.2857	1.66667	0	0	623.268
1	230110301	2	11	2	1234	1	2	0	4.60233	1	1	650	10	7.14286	1.66667	64.2857	39.2857	1.66667	21.4286	3.33333	783.221
1	230110301	2	11	2	1234	2	2	0	4.60233	1	1	0	0	0	0	0	0	0	0	0	0
1	230110311	2	11	2	1235	1	2	1	4.77755	1	1	950	196.429	64.2857	1.66667	107.143	10	50	64.2857	1.66667	1411.64
1	230110311	2	11	2	1235	2	2	1	4.77755	1	1	550	64.2857	1.66667	1.66667	107.143	21.4286	8.33333	0	0	738.405
1	230110321	2	11	2	1236	1	2	0	4.54209	0	1	250	0	0	0	21.4286	107.143	0	16.6667	150	503.4
1	230110321	2	11	2	1236	2	2	0	4.54209	0	1	650	3.33333	18.3333	0	107.143	235.714	0	1.66667	0	975.802
1	230110341	2	11	2	1237	1	2	1	5.0924	0	1	650	64.2857	10	10	35.7143	64.2857	1.66667	10	1.66667	833.667
1	230110341	2	11	2	1237	2	2	1	5.0924	0	1	650	16.6667	21.4286	10	21.4286	10	5	10	5	741.087
1	230110351	2	11	2	1238	1	2	1	4.61875	#NULL!	1	350	21.4286	50	0	1.66667	10	3.33333	3.33333	1.66667	433.99
1	230110351	2	11	2	1238	2	2	1	4.61875	#NULL!	1	450	35.7143	16.6667	5	1.66667	10	10	50	64.2857	622.614
1	230110401	2	11	2	1239	1	2	1	4.8898	0	1	550	10	78.5714	1.66667	16.6667	107.143	16.6667	107.143	0	852.652
1	230110401	2	11	2	1239	2	2	1	4.8898	0	1	750	21.4286	30	5	192.857	107.143	23.3333	107.143	35.7143	1214.83
1	230110411	2	11	2	1240	1	2	0	4.78576	1	1	450	353.571	0	0	432.143	353.571	64.2857	196.429	107.143	1820.16
1	230110411	2	11	2	1240	2	2	0	4.78576	1	1	650	275	1.66667	1.66667	550	35.7143	1.66667	196.429	1.66667	1624.3
1	230110441	2	11	2	1241	1	2	1	5.25667	0	1	250	21.4286	0	0	3.33333	21.4286	0	21.4286	3.33333	315.342
1	230110441	2	11	2	1241	2	2	1	5.25667	0	1	450	21.4286	21.4286	0	21.4286	7.14286	0	7.14286	7.14286	528.271
1	230110451	2	11	2	1242	1	2	1	4.51745	1	1	250	0	150	150	64.2857	107.143	0	150	3.33333	822.396
1	230110451	2	11	2	1242	2	2	1	4.51745	1	1	550	1.66667	50	64.2857	150	107.143	64.2857	350	275	1484.74
1	230120011	2	12	1	1428	1	2	0	5.26215	#NULL!	1	250	5	7.14286	1.66667	350	1.66667	1.66667	192.857	192.857	907.5
1	230120011	2	12	1	1428	2	2	0	5.26215	#NULL!	1	650	1.66667	1.66667	1.66667	432.143	1.66667	1.66667	192.857	35.7143	1241.75
1	230120021	2	12	1	1429	1	2	1	5.2512	1	1	750	35.7143	1.66667	1.66667	16.6667	35.7143	1.66667	35.7143	5	872.865
1	230120021	2	12	1	1429	2	2	1	5.2512	1	1	950	35.7143	1.66667	0	0	10	16.6667	196.429	0	1186.18
1	230120031	2	12	1	1430	1	2	1	4.80767	0	1	450	21.4286	0	0	21.4286	21.4286	0	64.2857	10	575.173
1	230120031	2	12	1	1430	2	2	1	4.80767	0	1	350	64.2857	0	0	21.4286	10	10	21.4286	0	469.921
1	230120041	2	12	1	1431	1	2	1	4.75565	1	1	1100	0	0	0	0	0	0	0	0	1100
1	230120041	2	12	1	1431	2	2	1	4.75565	1	1	1100	64.2857	1.66667	0	64.2857	5	5	250	7.14286	1460.76
1	230120051	2	12	1	1432	1	2	0	5.27584	0	1	450	1.66667	1.66667	1.66667	1.66667	64.2857	1.66667	64.2857	1.66667	573.802
1	230120051	2	12	1	1432	2	2	0	5.27584	0	1	350	16.6667	1.66667	1.66667	5	35.7143	8.33333	107.143	16.6667	522.84
1	230120061	2	12	1	1433	1	2	1	4.55578	0	1	550	117.857	0	0	21.4286	21.4286	0	21.4286	0	724.911
1	230120061	2	12	1	1433	2	2	1	4.55578	0	1	650	150	0	0	250	117.857	0	64.2857	0	1183.21
1	230120071	2	12	1	1434	1	2	0	4.65982	0	1	1100	35.7143	150	0	1.66667	107.143	1.66667	1.66667	1.66667	1371.68
1	230120071	2	12	1	1434	2	2	0	4.65982	0	1	0	0	0	0	0	0	0	0	0	0
1	230120081	2	12	1	1435	1	2	1	4.78029	0	1	550	64.2857	64.2857	0	0	10	0	0	0	680.914
1	230120081	2	12	1	1435	2	2	1	4.78029	0	1	450	64.2857	3.33333	3.33333	3.33333	3.33333	1.66667	1.66667	1.66667	530.751
1	230120091	2	12	1	1436	1	2	0	4.65435	0	1	250	107.143	10	0	0	64.2857	0	10	5	436.32
1	230120091	2	12	1	1436	2	2	0	4.65435	0	1	550	107.143	16.6667	16.6667	5	35.7143	8.33333	5	8.33333	743.345
1	230120121	2	12	1	1437	1	2	0	5.23751	#NULL!	1	950	35.7143	8.33333	0	16.6667	350	8.33333	5	5	1335.26
1	230120121	2	12	1	1437	2	2	0	5.23751	#NULL!	1	950	23.3333	1.66667	1.66667	8.33333	107.143	1.66667	64.2857	64.2857	1191.33
1	230120141	2	12	1	1438	1	2	1	4.4627	#NULL!	1	550	64.2857	3.33333	1.66667	1.66667	107.143	3.33333	64.2857	10	784.35
1	230120141	2	12	1	1438	2	2	1	4.4627	#NULL!	1	550	196.429	3.33333	1.66667	1.66667	107.143	10	64.2857	10	922.161
1	230120151	2	12	1	1439	1	2	1	5.04312	0	1	350	3.33333	5	0	0	10	0	5	0	371.195
1	230120151	2	12	1	1439	2	2	1	5.04312	0	1	750	21.4286	5	0	0	21.4286	0	10	0	803.914
1	230120161	2	12	1	1440	1	2	1	4.67625	0	1	350	64.2857	1.66667	1.66667	10	21.4286	1.66667	21.4286	1.66667	467.268
1	230120161	2	12	1	1440	2	2	1	4.67625	0	1	950	21.4286	1.66667	1.66667	64.2857	10	1.66667	21.4286	1.66667	1062.27
1	230120171	2	12	1	1441	1	2	0	5.22656	1	1	1100	196.429	64.2857	64.2857	16.6667	150	16.6667	275	150	1950.45
1	230120171	2	12	1	1441	2	2	0	5.22656	1	1	1100	107.143	5	5	10	10	10	117.857	10	1356.56
1	230120191	2	12	1	1442	1	2	0	5.26762	0	1	150	16.6667	0	0	16.6667	117.857	23.3333	107.143	16.6667	416.162
1	230120191	2	12	1	1442	2	2	0	5.26762	0	1	21.4286	1.66667	21.4286	8.33333	78.5714	7.14286	50	21.4286	11.6667	198.739
1	230120201	2	12	1	1443	1	2	0	4.7091	0	1	1100	107.143	0	0	64.2857	21.4286	0	117.857	10	1396.58
1	230120201	2	12	1	1443	2	2	0	4.7091	0	1	0	0	0	0	0	0	0	0	0	0
1	230120211	2	12	1	1444	1	2	0	4.39699	0	1	1100	64.2857	3.33333	3.33333	1.66667	64.2857	1.66667	196.429	1.66667	1407.64
1	230120211	2	12	1	1444	2	2	0	4.39699	0	1	650	21.4286	7.14286	1.66667	1.66667	117.857	1.66667	196.429	1.66667	964.282
1	230120251	2	12	1	1445	1	2	0	5.03491	0	1	850	150	0	0	10	107.143	0	10	0	1112.99
1	230120251	2	12	1	1445	2	2	0	5.03491	0	1	1100	550	353.571	0	196.429	275	78.5714	7.14286	78.5714	2525.5
1	230120271	2	12	2	1384	1	2	0	4.73922	0	1	650	0	0	0	1.66667	0	0	36.6667	0	684.253
1	230120271	2	12	2	1384	2	2	0	4.73922	0	1	550	0	0	0	1.66667	0	0	0	0	551.473
1	230120281	2	12	2	1385	1	2	0	4.49555	0	1	650	10	1.66667	1.66667	1.66667	117.857	1.66667	1.66667	1.66667	773.825
1	230120281	2	12	2	1385	2	2	0	4.49555	0	1	950	16.6667	0	0	0	150	0	16.6667	16.6667	1128.85
1	230120301	2	12	2	1386	1	2	0	5.01848	1	1	750	0	0	0	107.143	21.4286	0	117.857	64.2857	1022.38
1	230120301	2	12	2	1386	2	2	0	5.01848	1	1	950	10	0	0	35.7143	10	0	117.857	64.2857	1159.05
1	230120331	2	12	2	1387	1	2	1	4.88433	0	1	250	0	0	0	0	250	0	10	10	489.72
1	230120331	2	12	2	1387	2	2	1	4.88433	0	1	450	64.2857	0	0	0	23.3333	10	10	0	552.628
1	230120381	2	12	2	1388	1	2	1	5.13895	0	1	550	0	107.143	0	35.7143	0	0	1.66667	0	679.383
1	230120381	2	12	2	1388	2	2	1	5.13895	0	1	650	0	0	0	3.33333	107.143	0	0	0	748.304
1	230120391	2	12	2	1389	1	2	1	5.33607	0	1	450	107.143	3.33333	64.2857	16.6667	35.7143	16.6667	35.7143	16.6667	730.423
1	230120391	2	12	2	1389	2	2	1	5.33607	0	1	450	107.143	64.2857	21.4286	35.7143	35.7143	8.33333	35.7143	5	742.719
1	230120401	2	12	2	1390	1	2	0	4.91718	1	1	250	21.4286	64.2857	250	21.4286	107.143	10	250	150	1047.4
1	230120401	2	12	2	1390	2	2	0	4.91718	1	1	35.7143	64.2857	107.143	196.429	21.4286	64.2857	21.4286	64.2857	64.2857	596.221
1	230120431	2	12	2	1391	1	2	0	5.17728	1	1	1100	35.7143	16.6667	1.66667	1.66667	16.6667	1.66667	35.7143	35.7143	1231.57
1	230120431	2	12	2	1391	2	2	0	5.17728	1	1	850	1.66667	35.7143	8.33333	8.33333	16.6667	3.33333	16.6667	8.33333	938.922
1	230120451	2	12	2	1392	1	2	1	5.02943	1	1	750	250	21.4286	1.66667	35.7143	196.429	1.66667	64.2857	21.4286	1303.72
1	230120451	2	12	2	1392	2	2	1	5.02943	1	1	750	107.143	10	5	10	107.143	1.66667	150	10	1119
1	230120461	2	12	2	1393	1	2	0	4.41615	0	1	650	5	0	0	21.4286	16.6667	0	107.143	5	788.697
1	230120461	2	12	2	1393	2	2	0	4.41615	0	1	950	35.7143	35.7143	0	35.7143	35.7143	16.6667	35.7143	10	1135.85
1	230120501	2	12	2	1394	1	2	0	5.27858	1	1	550	16.6667	450	0	550	16.6667	0	350	0	1785.13
1	230120501	2	12	2	1394	2	2	0	5.27858	1	1	350	192.857	150	0	35.7143	21.4286	16.6667	150	35.7143	906.329
1	220130111	2	13	1	1539	1	1	1	4.49008	0	3	64.2857	10	0	0	0	196.429	5	250	250	683.947
1	220130111	2	13	1	1539	2	1	1	4.49008	0	3	550	117.857	0	0	0	64.2857	0	250	117.857	1046.04
1	220130151	2	13	1	1541	1	1	1	4.83504	1	5	1100	64.2857	350	0	107.143	196.429	0	64.2857	21.4286	1823.62
1	220130151	2	13	1	1541	2	1	1	4.83504	1	5	1100	10	5	1.66667	21.4286	1.66667	0	150	1.66667	1272.04
1	220130171	2	13	1	1542	1	1	1	4.4052	#NULL!	3	450	250	196.429	0	196.429	30	0	0	0	1076.68
1	220130171	2	13	1	1542	2	1	1	4.4052	#NULL!	3	450	35.7143	5	1.66667	16.6667	16.6667	1.66667	16.6667	1.66667	539.12
1	220130301	2	13	2	1490	1	1	0	5.22656	0	3	550	0	0	0	0	450	0	107.143	0	1046.29
1	220130301	2	13	2	1490	2	1	0	5.22656	0	3	650	7.14286	1.66667	1.66667	1.66667	250	1.66667	64.2857	21.4286	960.922
1	220130351	2	13	2	1494	1	1	1	4.4271	0	3	746.429	5	5	0	16.6667	275	0	10	0	1024.34
1	220130351	2	13	2	1494	2	1	1	4.4271	0	3	350	1.66667	1.66667	1.66667	16.6667	35.7143	1.66667	117.857	1.66667	509.527
1	220130371	2	13	2	1495	1	1	0	4.58042	0	3	750	117.857	16.6667	235.714	64.2857	350	16.6667	64.2857	21.4286	1574.12
1	220130371	2	13	2	1495	2	1	0	4.58042	0	3	750	64.2857	1.66667	64.2857	35.7143	196.429	21.4286	107.143	107.143	1288.9
1	220130441	2	13	2	1499	1	1	0	5.22656	0	3	1100	10	1.66667	0	10	0	0	250	0	1343.83
1	220130441	2	13	2	1499	2	1	0	5.22656	0	3	950	10	1.66667	1.66667	1.66667	1.66667	1.66667	250	1.66667	1192.43
1	220130461	2	13	2	1500	1	1	0	4.96372	0	5	750	107.143	21.4286	5	107.143	35.7143	5	196.429	16.6667	1201.51
1	220130461	2	13	2	1500	2	1	0	4.96372	0	5	650	35.7143	3.33333	1.66667	35.7143	35.7143	1.66667	35.7143	10	795.341
1	220130491	2	13	2	1502	1	1	1	4.5065	0	3	117.857	1.66667	1.66667	0	3.33333	64.2857	64.2857	1.66667	1.66667	239.98
1	220130491	2	13	2	1502	2	1	1	4.5065	0	3	250	10	3.33333	1.66667	21.4286	196.429	3.33333	64.2857	1.66667	520.152
1	220130551	2	13	2	1503	1	1	0	5.26762	0	3	550	107.143	107.143	21.4286	16.6667	196.429	10	107.143	5	1072.75
1	220130551	2	13	2	1503	2	1	0	5.26762	0	3	950	107.143	64.2857	5	16.6667	275	16.6667	150	16.6667	1541.66
1	220130591	2	13	3	1472	1	1	0	5.1937	#NULL!	3	1100	10	1.66667	0	0	1.66667	0	450	0	1515.27
1	220130591	2	13	3	1472	2	1	0	5.1937	#NULL!	3	950	36.6667	1.66667	1.66667	746.429	1.66667	1.66667	278.571	1.66667	1902.98
1	220130601	2	13	3	1473	1	1	0	4.80493	0	5	950	5	0	0	0	16.6667	0	196.429	107.143	1234.15
1	220130601	2	13	3	1473	2	1	0	4.80493	0	5	950	1.66667	1.66667	1.66667	10	21.4286	10	117.857	10	1105.07
1	220130641	2	13	3	1474	1	1	1	5.09514	0	3	750	7.14286	3.33333	3.33333	1.66667	7.14286	1.66667	117.857	1.66667	879.457
1	220130641	2	13	3	1474	2	1	1	5.09514	0	3	950	107.143	35.7143	5	23.3333	107.143	1.66667	64.2857	1.66667	1270.38
1	220130671	2	13	3	1476	1	1	1	4.44901	1	3	1100	1.66667	1.66667	1.66667	1.66667	107.143	1.66667	64.2857	1.66667	1261.95
1	220130671	2	13	3	1476	2	1	1	4.44901	1	3	950	10	21.4286	21.4286	16.6667	107.143	5	196.429	10	1298.8
1	220130751	2	13	3	1479	1	1	1	4.50376	0	5	950	1.66667	1.66667	0	107.143	107.143	1.66667	196.429	1.66667	1321.67
1	220130751	2	13	3	1479	2	1	1	4.50376	0	5	1100	21.4286	1.66667	1.66667	107.143	10	1.66667	150	1.66667	1365.1
1	220140041	2	14	1	1601	1	2	0	5.11157	0	1	650	275	30	11.6667	23.3333	196.429	8.33333	16.6667	8.33333	1187.74
1	220140041	2	14	1	1601	2	2	0	5.11157	0	1	1100	35.7143	50	23.3333	16.6667	107.143	16.6667	16.6667	16.6667	1357.02
1	220140051	2	14	1	1602	1	2	1	5.16359	1	1	850	10	1.66667	1.66667	16.6667	192.857	1.66667	1.66667	10	1060.73
1	220140051	2	14	1	1602	2	2	1	5.16359	1	1	667.857	23.3333	1.66667	1.66667	35.7143	21.4286	1.66667	150	1.66667	881.888
1	220140061	2	14	1	1603	1	2	0	5.05955	0	1	1100	50	35.7143	8.33333	50	50	8.33333	107.143	16.6667	1395.84
1	220140061	2	14	1	1603	2	2	0	5.05955	0	1	1100	107.143	35.7143	16.6667	35.7143	35.7143	35.7143	107.143	35.7143	1475.43
1	220140101	2	14	1	1604	1	2	0	5.11978	0	1	850	16.6667	1.66667	1.66667	10	10	1.66667	1.66667	10	898.758
1	220140101	2	14	1	1604	2	2	0	5.11978	0	1	750	21.4286	107.143	8.33333	235.714	16.6667	16.6667	150	16.6667	1261.58
1	220140131	2	14	1	1605	1	2	1	5.31143	0	1	550	107.143	0	0	16.6667	3.33333	5	107.143	64.2857	828.1
1	220140131	2	14	1	1605	2	2	1	5.31143	0	1	0	0	0	0	0	0	0	0	0	0
1	220140151	2	14	1	1606	1	2	1	4.87064	1	1	650	16.6667	7.14286	1.66667	21.4286	64.2857	1.66667	64.2857	10	818.08
1	220140151	2	14	1	1606	2	2	1	4.87064	1	1	950	10	1.66667	1.66667	64.2857	64.2857	1.66667	64.2857	192.857	1295.79
1	220140191	2	14	1	1607	1	2	1	5.12799	0	1	650	3.33333	1.66667	1.66667	235.714	235.714	10	107.143	1.66667	1180.5
1	220140191	2	14	1	1607	2	2	1	5.12799	0	1	0	0	0	0	0	0	0	0	0	0
1	230150501	2	15	2	1657	1	1	0	5.02122	1	2	550	0	0	0	64.2857	64.2857	10	350	3.33333	988.403
1	230150501	2	15	2	1657	2	1	0	5.02122	1	2	450	150	1.66667	1.66667	64.2857	21.4286	1.66667	150	1.66667	815.828
1	220160081	2	16	1	1757	1	1	0	5.03765	0	2	850	10	117.857	3.33333	21.4286	117.857	3.33333	117.857	21.4286	1219.09
1	220160081	2	16	1	1757	2	1	0	5.03765	0	2	850	3.33333	21.4286	0	3.33333	21.4286	1.66667	117.857	64.2857	1054.66
1	220160091	2	16	1	1758	1	1	1	4.69541	0	4	850	35.7143	1.66667	1.66667	10	64.2857	1.66667	250	1.66667	1181.21
1	220160091	2	16	1	1758	2	1	1	4.69541	0	4	950	16.6667	1.66667	1.66667	16.6667	8.33333	16.6667	250	10	1238.23
1	220160161	2	16	1	1760	1	1	1	4.91992	0	4	950	1.66667	0	0	21.4286	64.2857	1.66667	64.2857	0	1086.74
1	220160161	2	16	1	1760	2	1	1	4.91992	0	4	150	0	0	0	21.4286	107.143	1.66667	64.2857	5	327.361
1	220160361	2	16	2	1718	1	1	0	5.1937	0	4	1100	150	64.2857	1.66667	1.66667	21.4286	0	0	0	1329.84
1	220160361	2	16	2	1718	2	1	0	5.1937	0	4	950	364.286	3.33333	0	0	21.4286	0	0	0	1335.99
1	220160391	2	16	2	1720	1	1	1	4.93908	1	4	950	1.66667	5	1.66667	30	16.6667	1.66667	235.714	1.66667	1212.72
1	220160391	2	16	2	1720	2	1	1	4.93908	1	4	850	64.2857	1.66667	1.66667	50	16.6667	35.7143	64.2857	64.2857	1118.17
1	220160411	2	16	2	1722	1	1	1	5.34428	0	4	1100	10	3.33333	275	16.6667	35.7143	16.6667	117.857	117.857	1649.21
1	220160411	2	16	2	1722	2	1	1	5.34428	0	4	950	16.6667	150	23.3333	16.6667	107.143	16.6667	107.143	35.7143	1374.55
1	220160441	2	16	2	1725	1	1	0	4.88159	0	2	0	16.6667	1.66667	0	5	16.6667	1.66667	192.857	35.7143	240.837
1	220160441	2	16	2	1725	2	1	0	4.88159	0	2	150	3.33333	0	0	64.2857	7.14286	0	117.857	21.4286	339.623
1	220160481	2	16	2	1728	1	1	0	5.14716	1	2	1100	107.143	16.6667	1.66667	16.6667	107.143	8.33333	250	16.6667	1578.31
1	220160481	2	16	2	1728	2	1	0	5.14716	1	2	1100	107.143	8.33333	0	50	35.7143	8.33333	350	16.6667	1624.46
1	220160531	2	16	2	1731	1	1	1	4.88706	1	4	1100	0	0	0	10	250	64.2857	150	150	1645.57
1	220160531	2	16	2	1731	2	1	1	4.88706	1	4	1100	0	18.3333	0	0	10	0	107.143	35.7143	1250.74
1	220160541	2	16	2	1732	1	1	0	4.88706	1	2	550	64.2857	16.6667	10	21.4286	21.4286	10	107.143	10	789.885
1	220160541	2	16	2	1732	2	1	0	4.88706	1	2	850	21.4286	35.7143	5	21.4286	35.7143	16.6667	35.7143	21.4286	1023.36
1	220160551	2	16	2	1733	1	1	1	4.79398	1	4	950	64.2857	0	0	0	107.143	0	64.2857	64.2857	1220.28
1	220160551	2	16	2	1733	2	1	1	4.79398	1	4	850	50	0	0	0	21.4286	0	64.2857	7.14286	982.407
1	220160571	2	16	2	1735	1	1	0	5.34155	0	4	750	117.857	107.143	1.66667	21.4286	64.2857	10	10	1.66667	1060.89
1	220160571	2	16	2	1735	2	1	0	5.34155	0	4	850	64.2857	35.7143	10	16.6667	107.143	10	3.33333	0	1078
1	220160691	2	16	3	1706	1	1	1	4.7666	1	4	1100	196.429	0	0	196.429	196.429	0	196.429	3.33333	1823.06
1	220160691	2	16	3	1706	2	1	1	4.7666	1	4	550	107.143	1.66667	1.66667	35.7143	107.143	1.66667	64.2857	1.66667	847.414
1	220160741	2	16	3	1709	1	1	0	5.16906	1	4	278.571	1.66667	7.14286	1.66667	1.66667	107.143	0	21.4286	21.4286	422.038
1	220160741	2	16	3	1709	2	1	0	5.16906	1	4	450	64.2857	10	0	0	107.143	0	0	0	618.569
1	220160861	2	16	3	1713	1	1	1	4.93087	1	4	950	107.143	107.143	0	0	192.857	10	150	107.143	1556.51
1	220160861	2	16	3	1713	2	1	1	4.93087	1	4	1100	64.2857	235.714	5	10	275	10	107.143	64.2857	1792.38
1	220180021	2	18	1	1961	1	2	1	5.30595	1	1	850	64.2857	1.66667	1.66667	21.4286	64.2857	1.66667	3.33333	1.66667	999.337
1	220180021	2	18	1	1961	2	2	1	5.30595	1	1	750	21.4286	3.33333	1.66667	3.33333	21.4286	1.66667	7.14286	3.33333	808.668
1	220180051	2	18	1	1962	1	2	1	5.23751	1	1	850	16.6667	1.66667	1.66667	10	150	1.66667	350	23.3333	1345.81
1	220180051	2	18	1	1962	2	2	1	5.23751	1	1	850	35.7143	1.66667	1.66667	16.6667	107.143	35.7143	0	107.143	1118.7
1	220180071	2	18	1	1963	1	2	1	5.05681	0	1	650	117.857	1.66667	1.66667	21.4286	107.143	1.66667	64.2857	64.2857	997.338
1	220180071	2	18	1	1963	2	2	1	5.05681	0	1	450	10	1.66667	1.66667	1.66667	1.66667	1.66667	21.4286	1.66667	488.082
1	220180101	2	18	1	1964	1	2	0	5.27858	0	1	550	117.857	5	0	5	21.4286	0	64.2857	5	757.337
1	220180101	2	18	1	1964	2	2	0	5.27858	0	1	750	64.2857	0	0	1.66667	10	0	64.2857	64.2857	935.295
1	220180111	2	18	1	1965	1	2	0	5.11157	1	1	950	64.2857	0	0	0	0	0	0	0	1014.22
1	220180111	2	18	1	1965	2	2	0	5.11157	1	1	950	0	0	0	0	21.4286	0	0	0	969.071
1	220180141	2	18	1	1966	1	2	0	4.88433	1	1	550	0	5	5	107.143	196.429	1.66667	35.7143	35.7143	891.931
1	220180141	2	18	1	1966	2	2	0	4.88433	1	1	850	64.2857	107.143	35.7143	35.7143	150	10	107.143	5	1319.6
1	220180191	2	18	2	1924	1	2	0	5.33607	0	1	850	107.143	0	0	107.143	10	0	450	0	1462.95
1	220180191	2	18	2	1924	2	2	0	5.33607	0	1	1100	35.7143	1.66667	0	7.14286	1.66667	1.66667	250	107.143	1458.64
1	220180201	2	18	2	1925	1	2	0	5.40726	1	1	1100	8.33333	7.14286	0	5	16.6667	5	196.429	35.7143	1343.53
1	220180201	2	18	2	1925	2	2	0	5.40726	1	1	950	5	64.2857	1.66667	10	35.7143	1.66667	235.714	64.2857	1320.47
1	220180241	2	18	2	1926	1	2	1	4.7885	#NULL!	1	650	7.14286	3.33333	1.66667	3.33333	7.14286	1.66667	10	10	689.756
1	220180241	2	18	2	1926	2	2	1	4.7885	#NULL!	1	1100	8.33333	8.33333	8.33333	107.143	23.3333	16.6667	16.6667	16.6667	1282.75
1	220180251	2	18	2	1927	1	2	1	5.36071	0	1	850	10	35.7143	16.6667	1.66667	35.7143	1.66667	35.7143	10	983.515
1	220180251	2	18	2	1927	2	2	1	5.36071	0	1	350	150	23.3333	5	35.7143	21.4286	1.66667	1.66667	16.6667	593.16
1	220180261	2	18	2	1928	1	2	1	4.78576	#NULL!	1	150	150	0	0	117.857	150	107.143	117.857	64.2857	789.343
1	220180261	2	18	2	1928	2	2	1	4.78576	#NULL!	1	0	0	0	0	0	0	0	0	0	0
1	220180271	2	18	2	1929	1	2	1	5.11157	0	1	550	8.33333	192.857	5	5	192.857	1.66667	21.4286	1.66667	934.704
1	220180271	2	18	2	1929	2	2	1	5.11157	0	1	450	35.7143	1.66667	1.66667	650	35.7143	16.6667	107.143	5	1209.64
1	220180281	2	18	2	1930	1	2	0	5.23203	1	1	450	21.4286	10	10	21.4286	10	1.66667	21.4286	10	547.027
1	220180281	2	18	2	1930	2	2	0	5.23203	1	1	550	10	3.33333	1.66667	21.4286	10	5	21.4286	1.66667	617.367
1	220180291	2	18	2	1931	1	2	1	5.02396	0	1	950	64.2857	3.33333	3.33333	1.66667	64.2857	1.66667	150	21.4286	1232.5
1	220180291	2	18	2	1931	2	2	1	5.02396	0	1	950	35.7143	3.33333	1.66667	3.33333	35.7143	1.66667	196.429	1.66667	1203.49
1	220180301	2	18	2	1932	1	2	0	4.72279	0	1	950	3.33333	1.66667	1.66667	35.7143	10	1.66667	64.2857	10	1064.15
1	220180301	2	18	2	1932	2	2	0	4.72279	0	1	850	21.4286	1.66667	1.66667	64.2857	1.66667	3.33333	21.4286	1.66667	956.305
1	220180321	2	18	2	1933	1	2	0	5.21834	0	1	1100	1.66667	64.2857	0	407.143	35.7143	21.4286	196.429	35.7143	1774.98
1	220180321	2	18	2	1933	2	2	0	5.21834	0	1	0	0	0	0	0	0	0	0	0	0
1	220180331	2	18	2	1934	1	2	0	4.51745	0	1	750	107.143	0	0	10	64.2857	0	0	21.4286	940.833
1	220180331	2	18	2	1934	2	2	0	4.51745	0	1	450	107.143	10	10	64.2857	0	5	196.429	10	820.991
1	220180361	2	18	2	1935	1	2	0	5.20465	1	1	950	321.429	10	1.66667	1.66667	21.4286	1.66667	23.3333	23.3333	1343.92
1	220180361	2	18	2	1935	2	2	0	5.20465	1	1	1100	107.143	10	1.66667	50	64.2857	1.66667	64.2857	1.66667	1379.39
1	220180381	2	18	2	1936	1	2	1	5.34976	0	1	650	21.4286	1.66667	1.66667	16.6667	150	1.66667	7.14286	1.66667	832.005
1	220180381	2	18	2	1936	2	2	1	5.34976	0	1	750	21.4286	10	1.66667	1.66667	21.4286	0	0	3.33333	805.352
1	220180391	2	18	2	1937	1	2	0	5.36619	0	1	1100	0	107.143	0	0	107.143	0	0	0	1291.68
1	220180391	2	18	2	1937	2	2	0	5.36619	0	1	1100	0	50	0	0	35.7143	0	107.143	0	1272.52
1	220180401	2	18	2	1938	1	2	1	4.85147	0	1	750	21.4286	64.2857	1.66667	21.4286	64.2857	1.66667	117.857	1.66667	1015.2
1	220180401	2	18	2	1938	2	2	1	4.85147	0	1	550	64.2857	10	10	21.4286	64.2857	10	117.857	10	831.613
1	220180421	2	18	2	1939	1	2	1	4.6653	#NULL!	1	0	107.143	0	0	0	196.429	0	0	550	737.257
1	220180421	2	18	2	1939	2	2	1	4.6653	#NULL!	1	350	150	5	1.66667	1.66667	107.143	5	3.33333	10	618.435
1	220190121	2	19	1	2042	1	1	0	4.84873	#NULL!	4	150	5	5	0	16.6667	5	0	5	0	183.143
1	220190121	2	19	1	2042	2	1	0	4.84873	#NULL!	4	550	5	5	5	150	10	16.6667	16.6667	5	739.48
1	220190171	2	19	1	2045	1	1	0	5.2293	0	4	650	7.14286	196.429	35.7143	10	117.857	1.66667	117.857	64.2857	1142.86
1	220190171	2	19	1	2045	2	1	0	5.2293	0	4	650	150	196.429	1.66667	16.6667	196.429	1.66667	107.143	450	1637.48
1	220190191	2	19	1	2046	1	1	1	5.26762	0	2	1100	150	150	1.66667	5	150	16.6667	353.571	8.33333	1861.76
1	220190191	2	19	1	2046	2	1	1	5.26762	0	2	1100	64.2857	7.14286	0	3.33333	64.2857	3.33333	196.429	3.33333	1412.07
1	210200021	2	20	1	2075	1	2	1	5.23203	1	1	150	1.66667	64.2857	150	1.66667	35.7143	5	64.2857	64.2857	506.267
1	210200021	2	20	1	2075	2	2	1	5.23203	1	1	1100	150	117.857	117.857	64.2857	196.429	23.3333	107.143	35.7143	1849.79
1	210200071	2	20	1	2076	1	2	1	4.8898	#NULL!	1	550	10	21.4286	50	10	117.857	0	350	64.2857	1108.62
1	210200071	2	20	1	2076	2	2	1	4.8898	#NULL!	1	850	1.66667	21.4286	64.2857	0	10	0	21.4286	0	962.629
1	210200121	2	20	1	2077	1	2	1	4.85695	1	1	450	107.143	275	23.3333	0	275	0	275	275	1545.66
1	210200121	2	20	1	2077	2	2	1	4.85695	1	1	750	10	50	0	0	5	0	30	30	861.05
1	210200131	2	20	1	2078	1	2	0	5.28679	1	1	950	107.143	107.143	16.6667	196.429	64.2857	10	275	10	1663.54
1	210200131	2	20	1	2078	2	2	0	5.28679	1	1	1100	39.2857	107.143	107.143	0	0	8.33333	353.571	275	1892.68
1	210200171	2	20	2	2068	1	2	1	5.37714	1	1	650	10	3.33333	1.66667	3.33333	10	1.66667	10	10	695.153
1	210200171	2	20	2	2068	2	2	1	5.37714	1	1	750	10	0	0	10	10	0	64.2857	5	839.341
1	210200221	2	20	2	2069	1	2	0	4.5859	0	1	450	10	0	0	10	0	10	64.2857	0	535.001
1	210200221	2	20	2	2069	2	2	0	4.5859	0	1	450	16.6667	0	0	10	64.2857	16.6667	107.143	107.143	731.704
1	210200251	2	20	2	2070	1	2	1	5.40726	1	1	850	21.4286	0	107.143	1.66667	107.143	0	35.7143	8.33333	1113.14
1	210200251	2	20	2	2070	2	2	1	5.40726	1	1	650	16.6667	10	16.6667	35.7143	35.7143	0	35.7143	35.7143	816.997
1	210210011	2	21	1	2186	1	1	1	4.92813	0	5	850	1.66667	1.66667	1.66667	1.66667	64.2857	8.33333	10	0	929.691
[truncated: 6,950 more rows]
